# Supplementary material for: Activation of pancreatic stellate cells attenuates intracellular Ca2+ signals due to downregulation of TRPA1 and protects against cell death induced by alcohol metabolites
Source: Springer Nature journal article supplement (doi:10.1038/s41419-022-05186-w), 2022-08-29

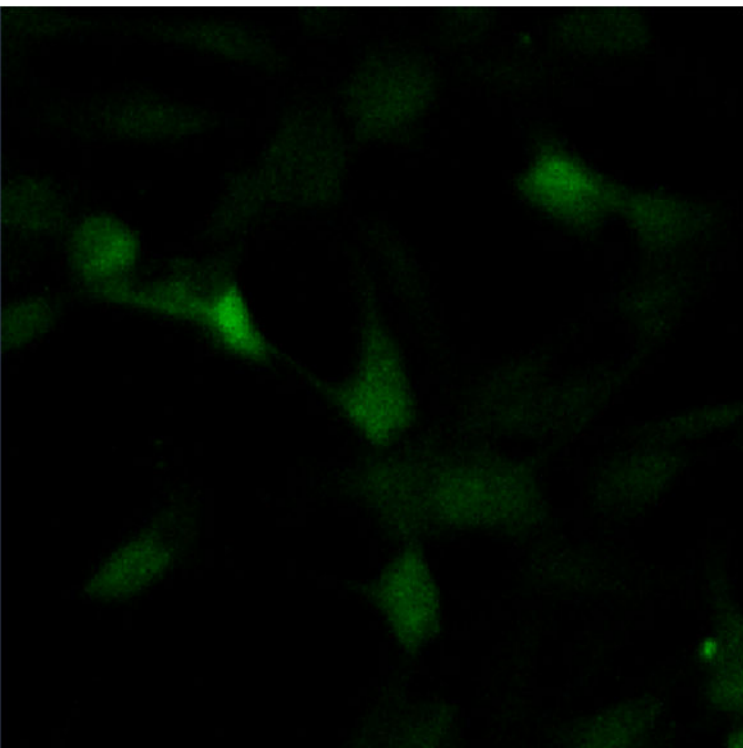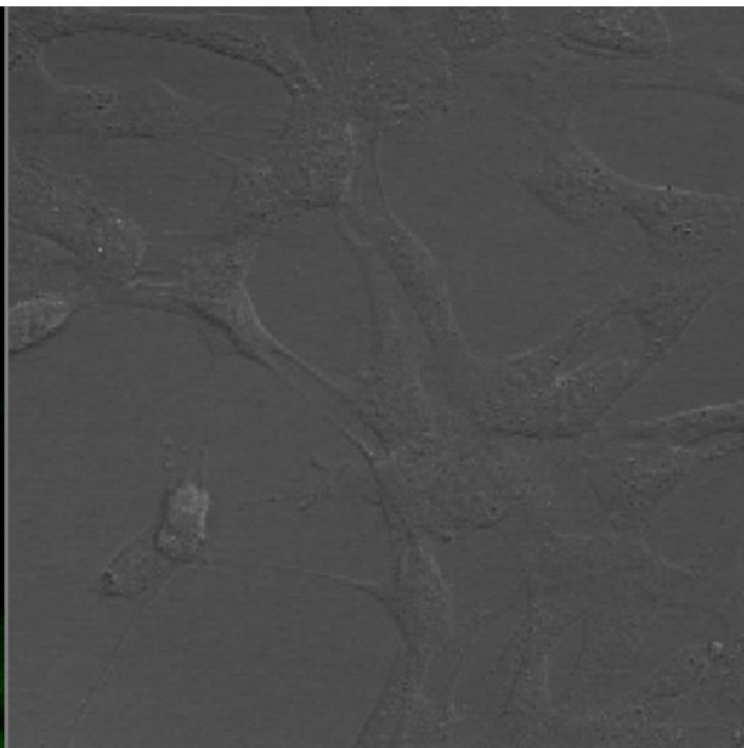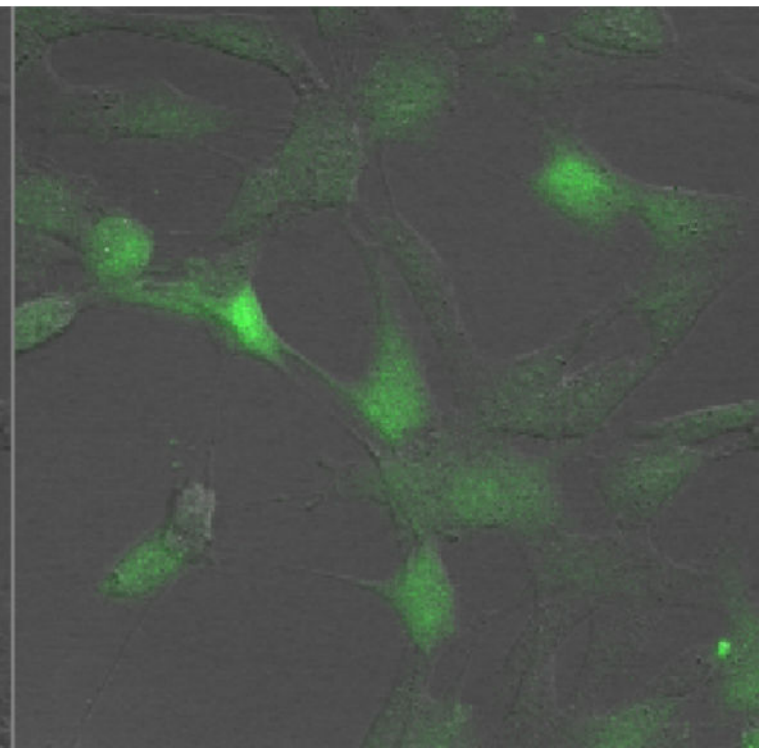



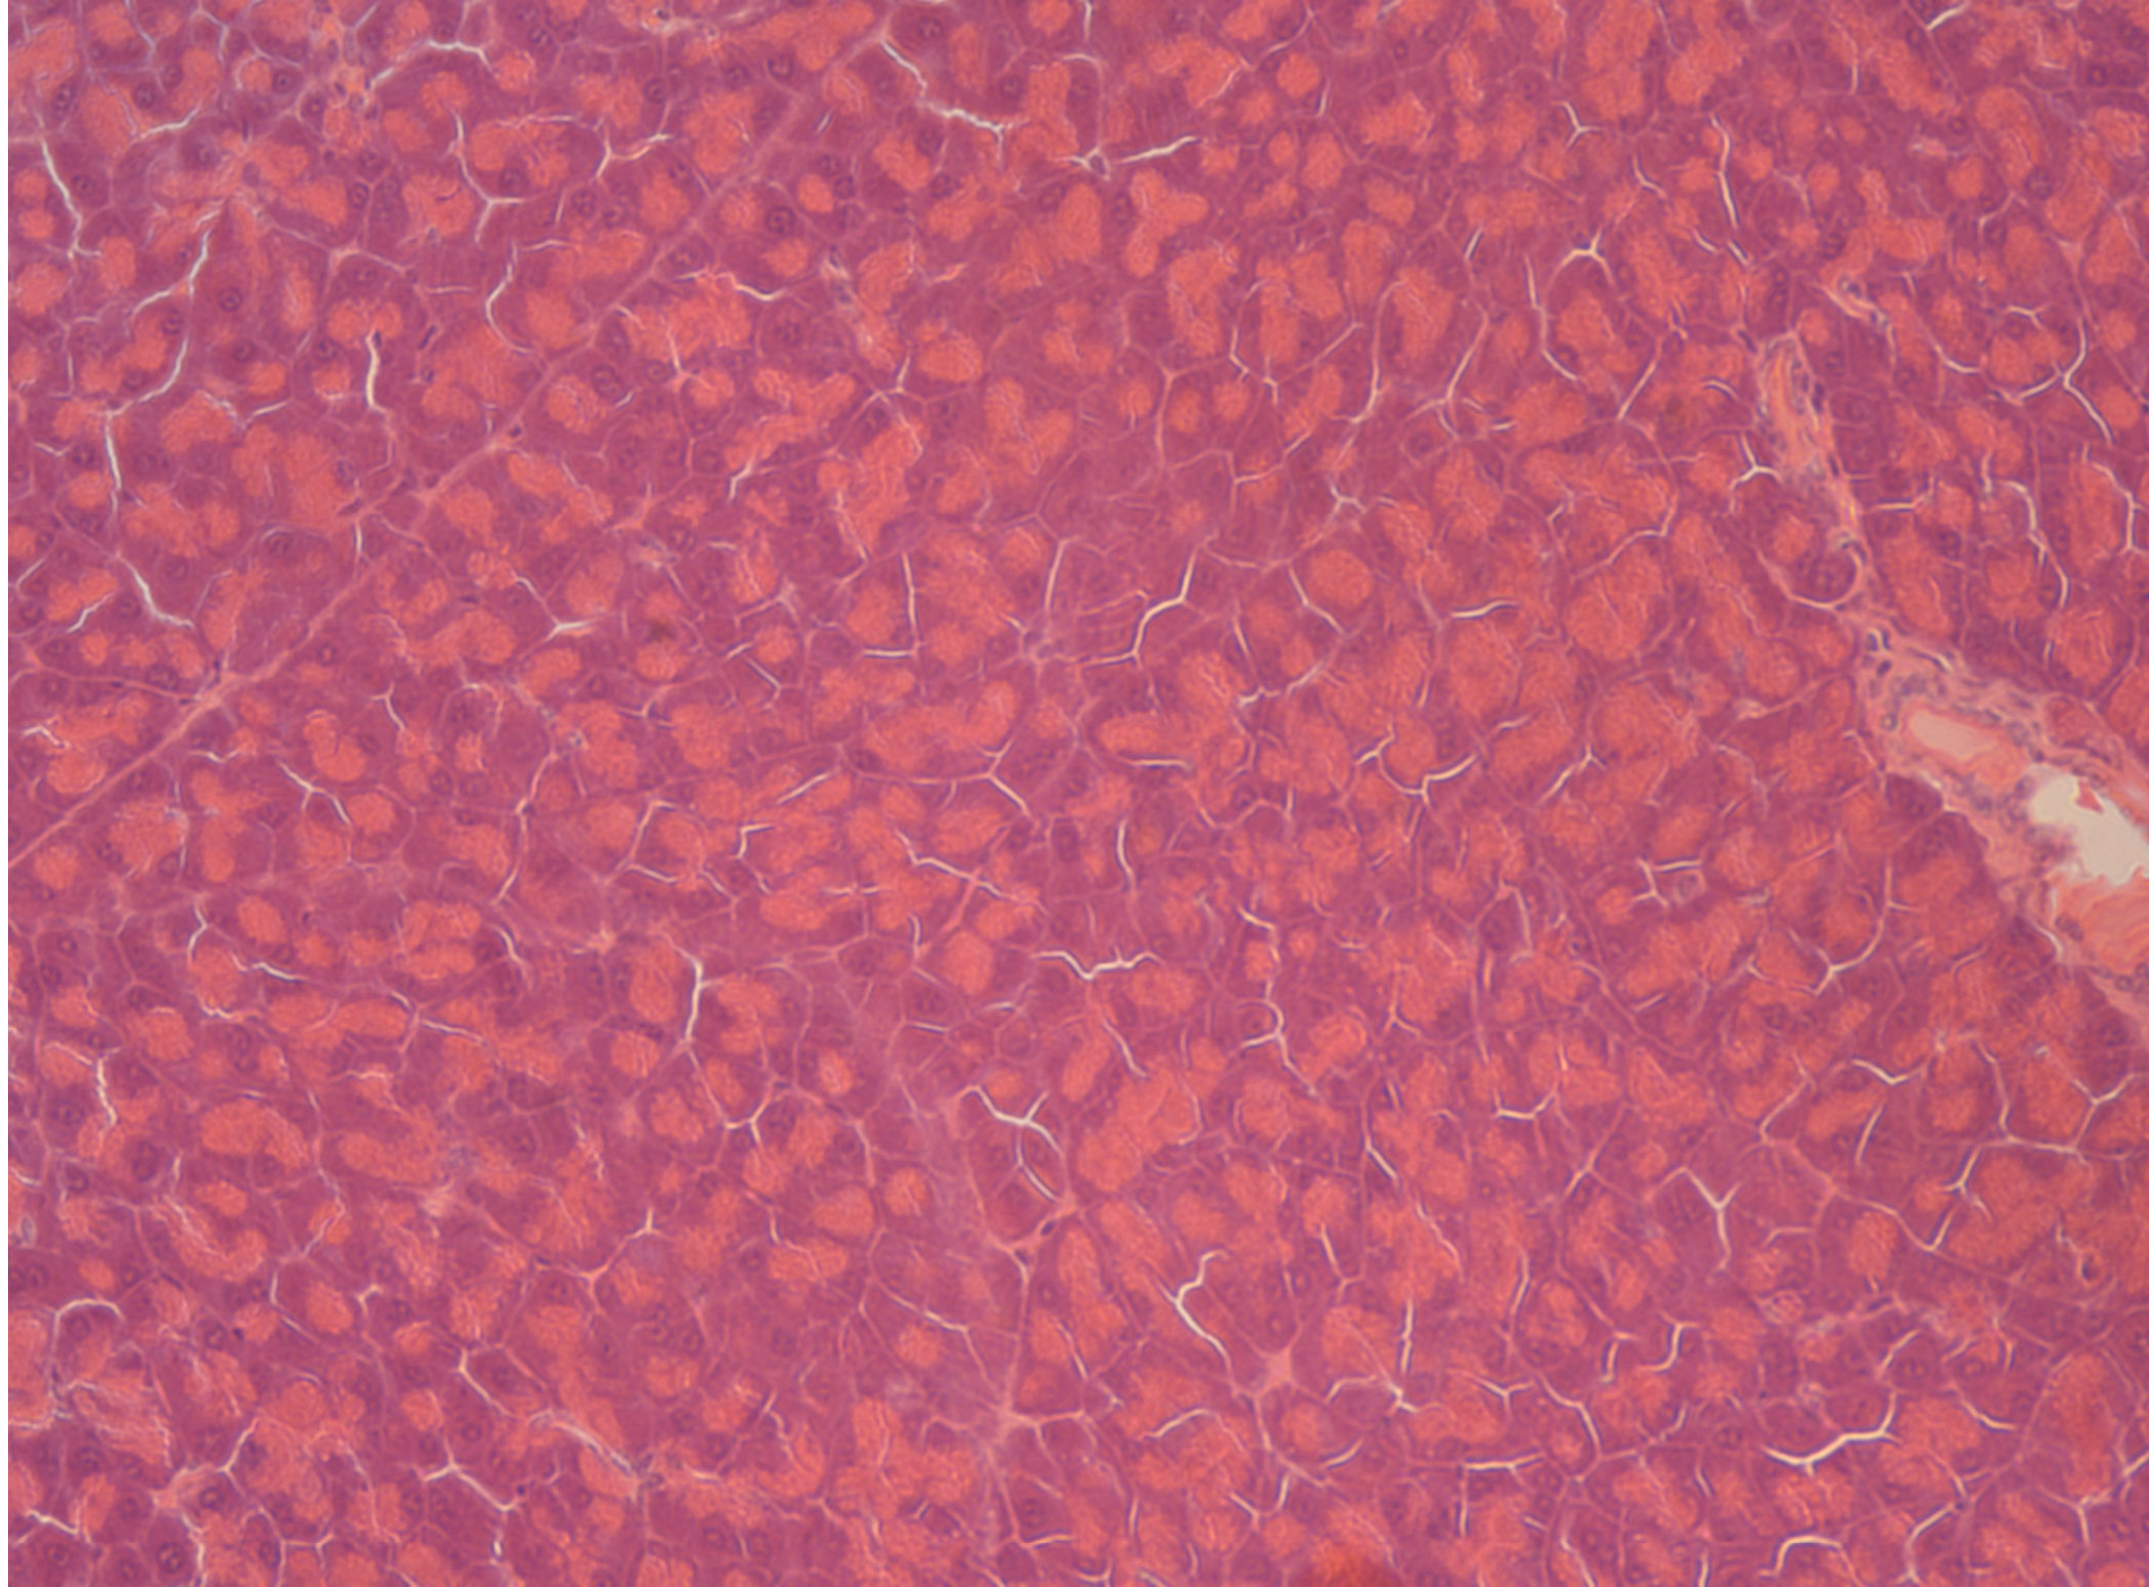

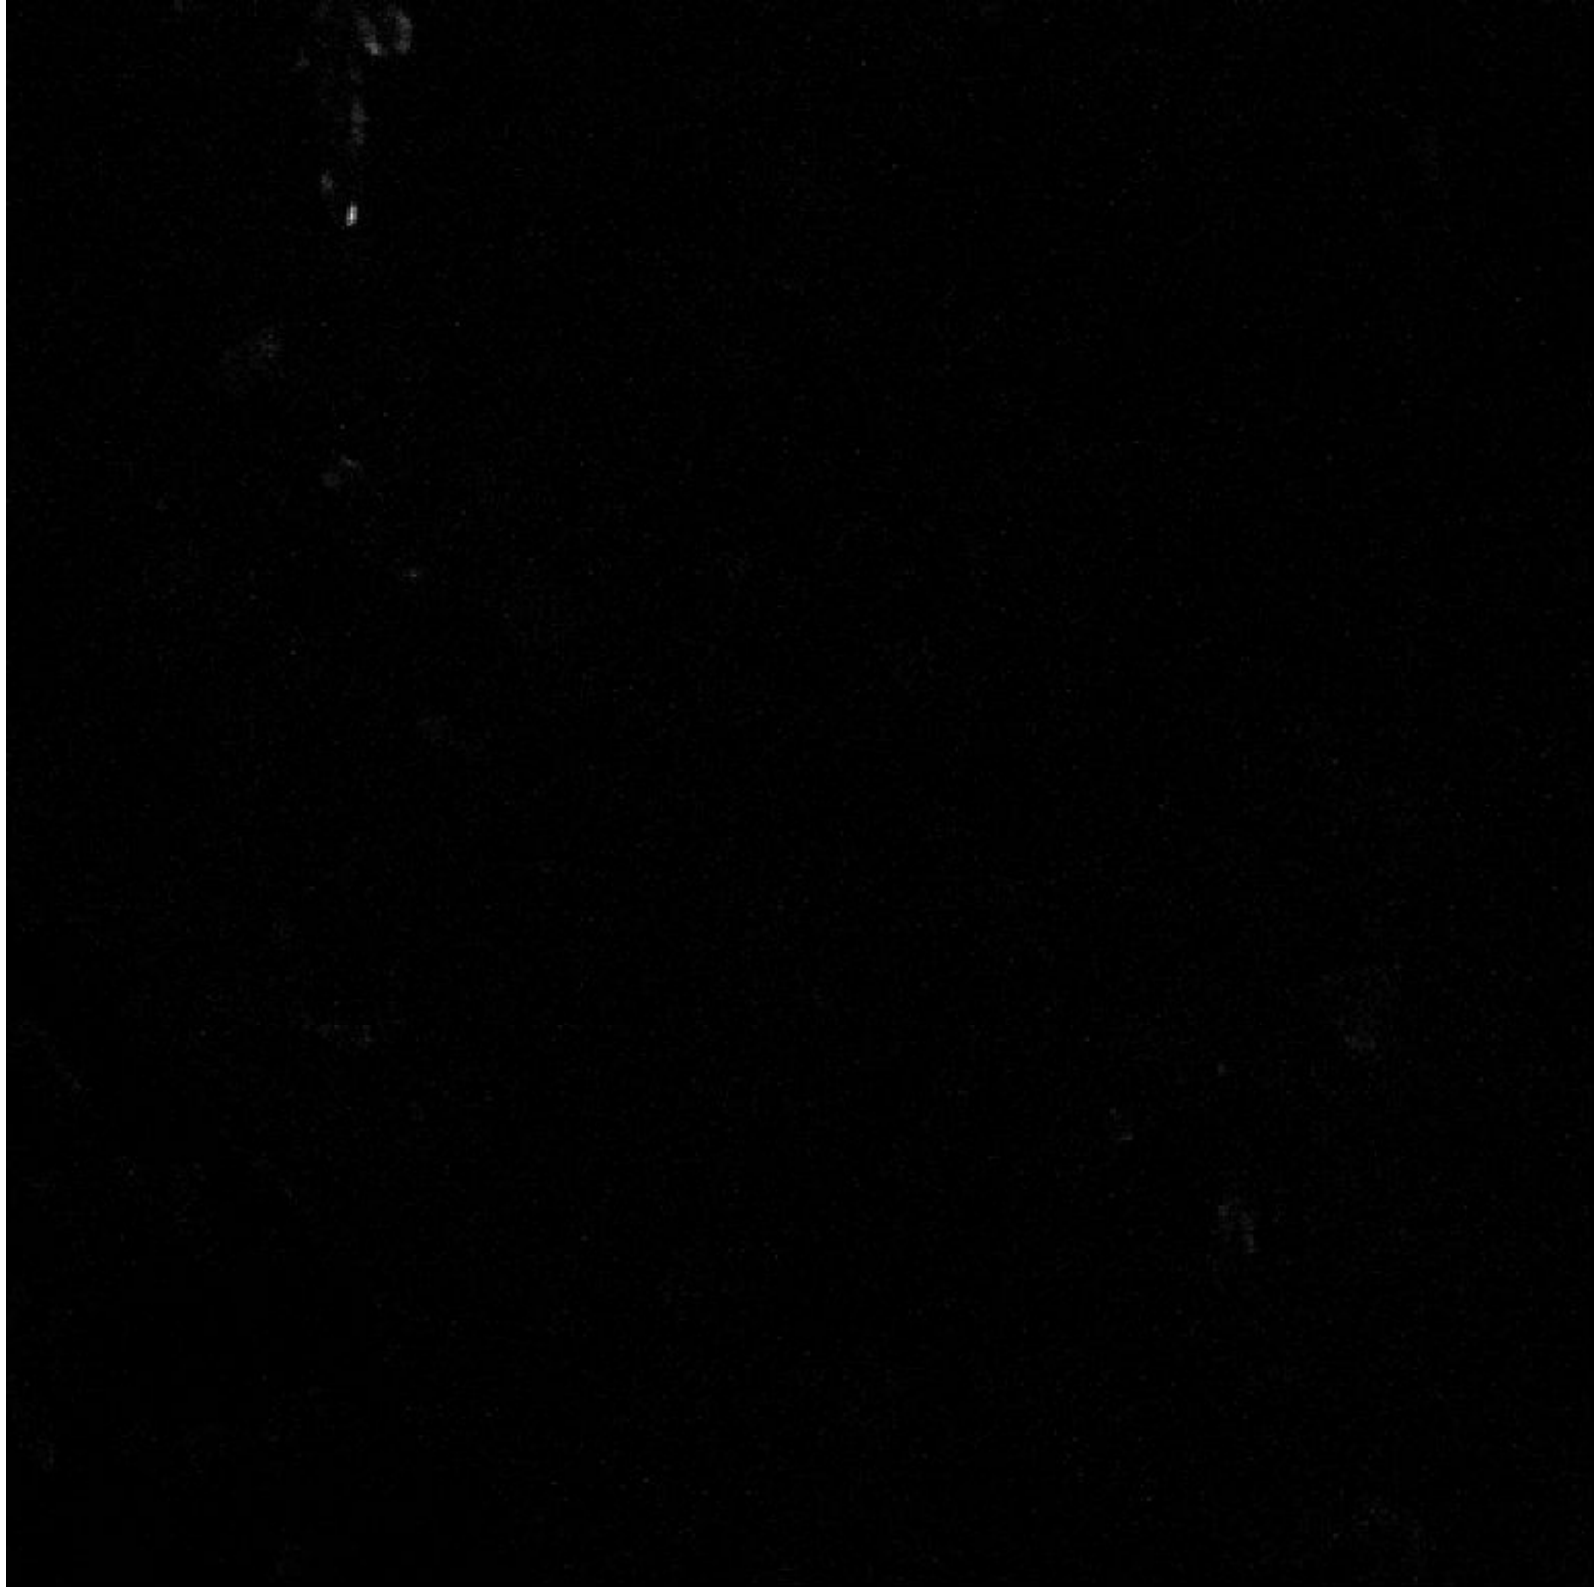



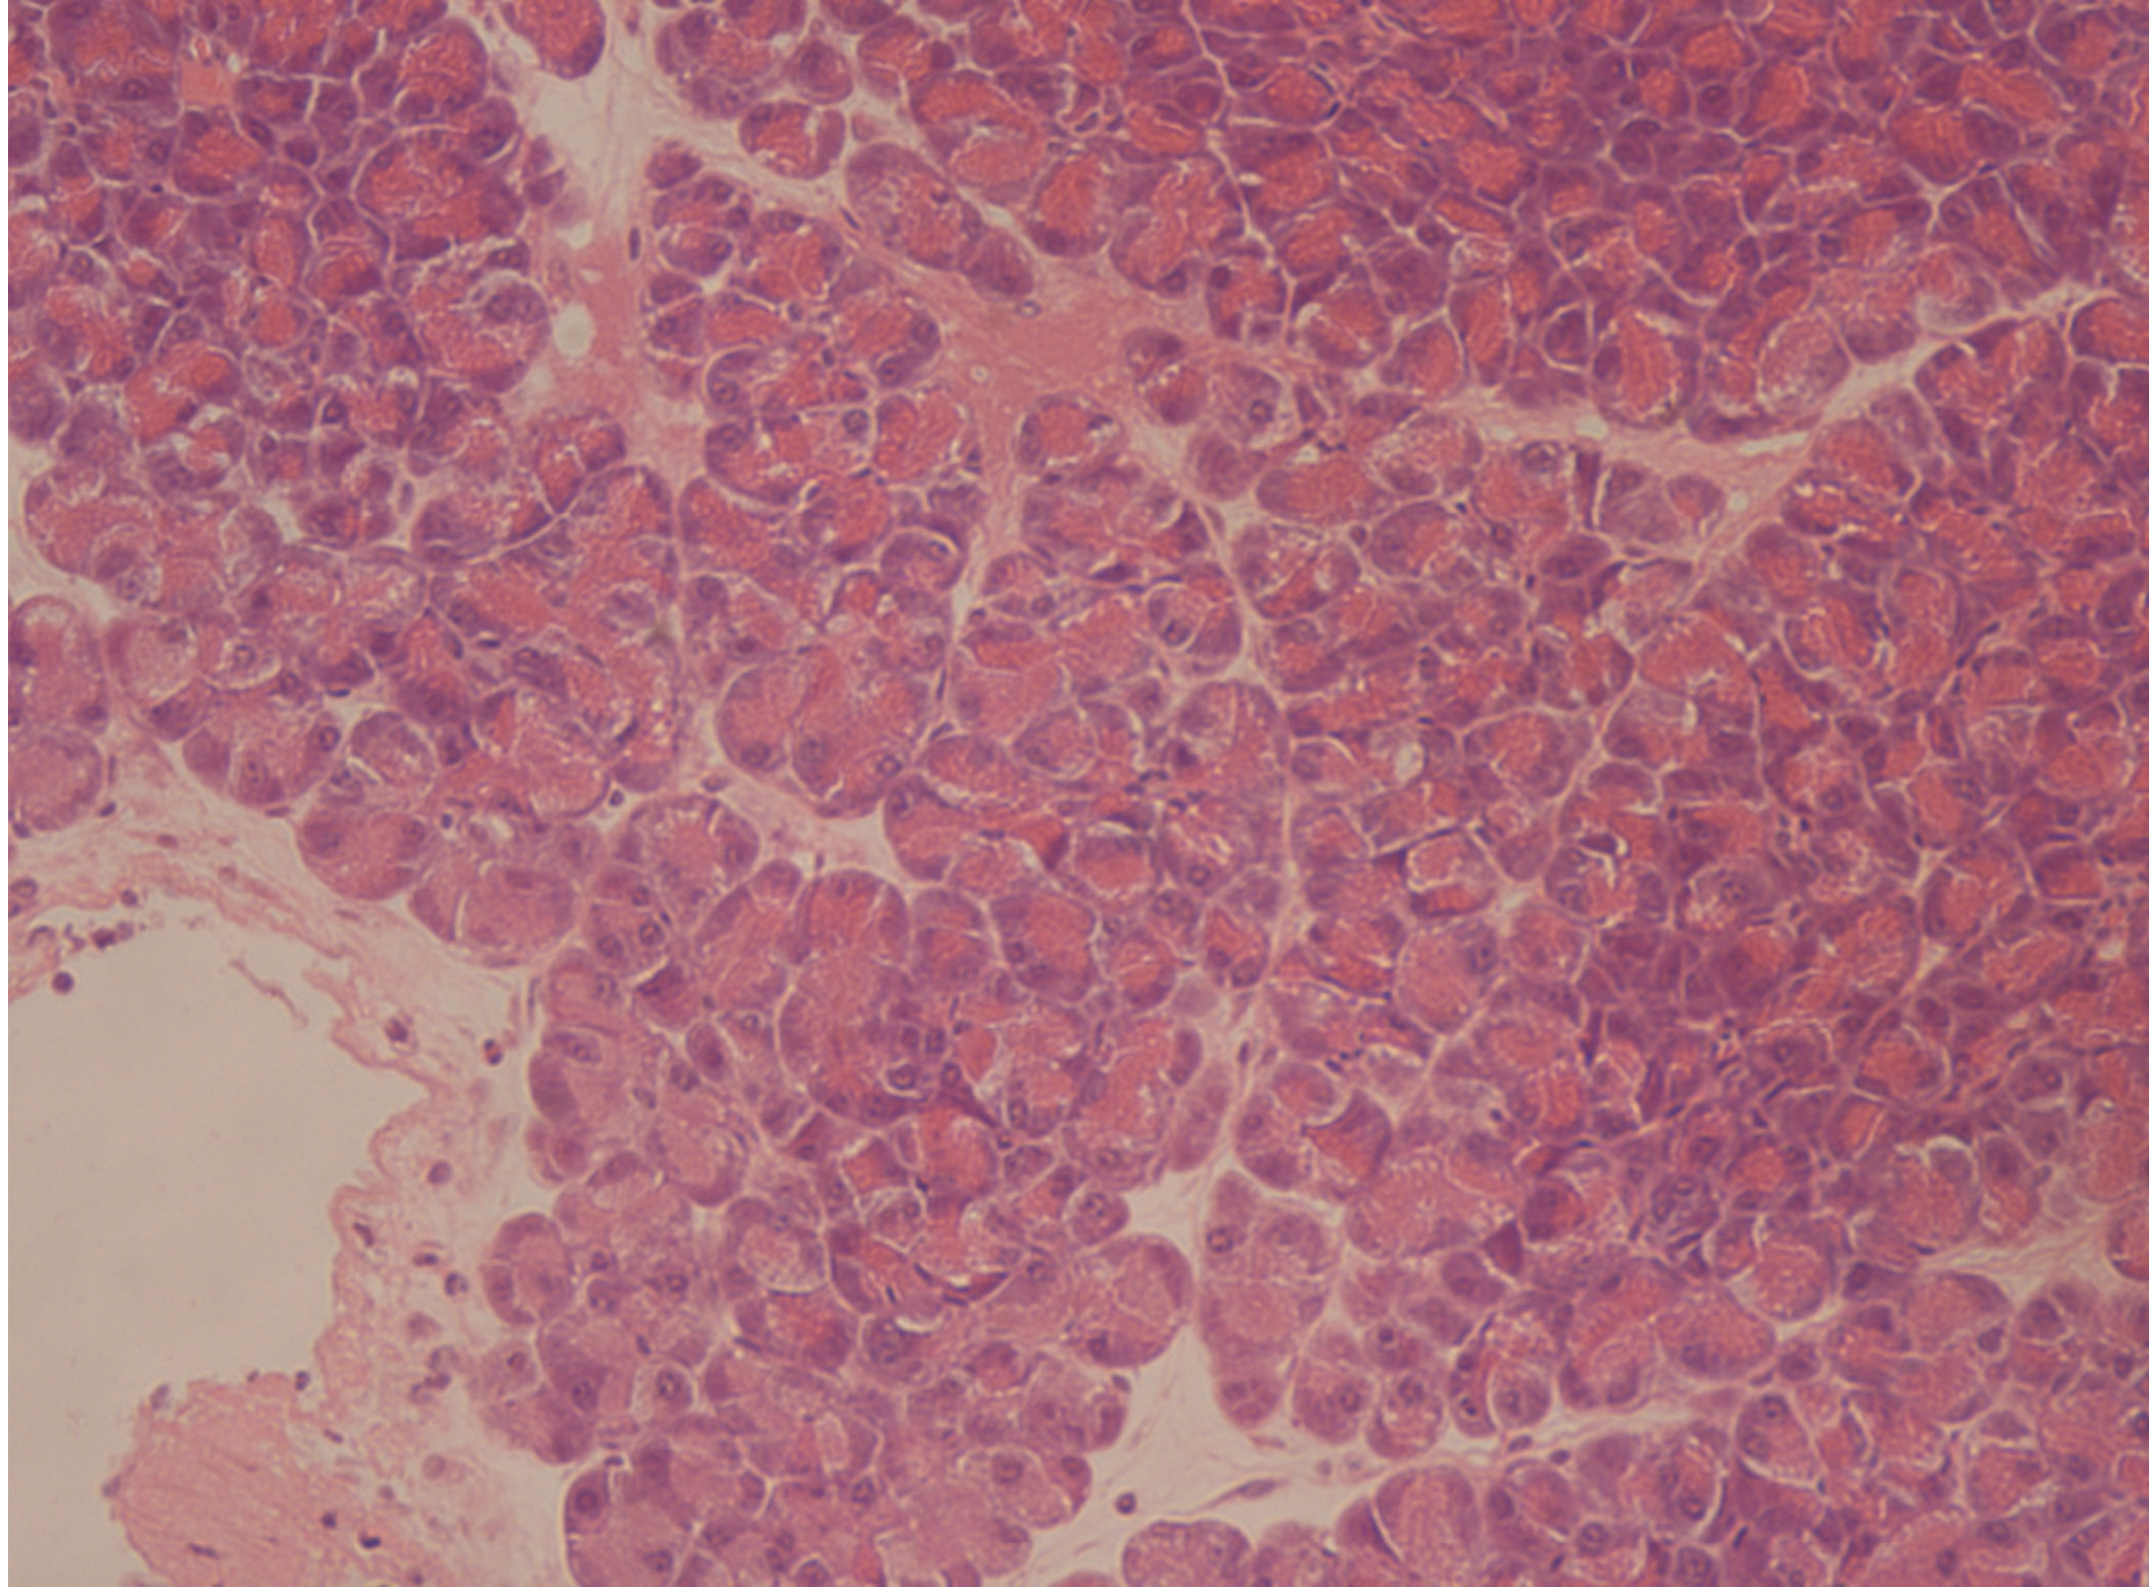



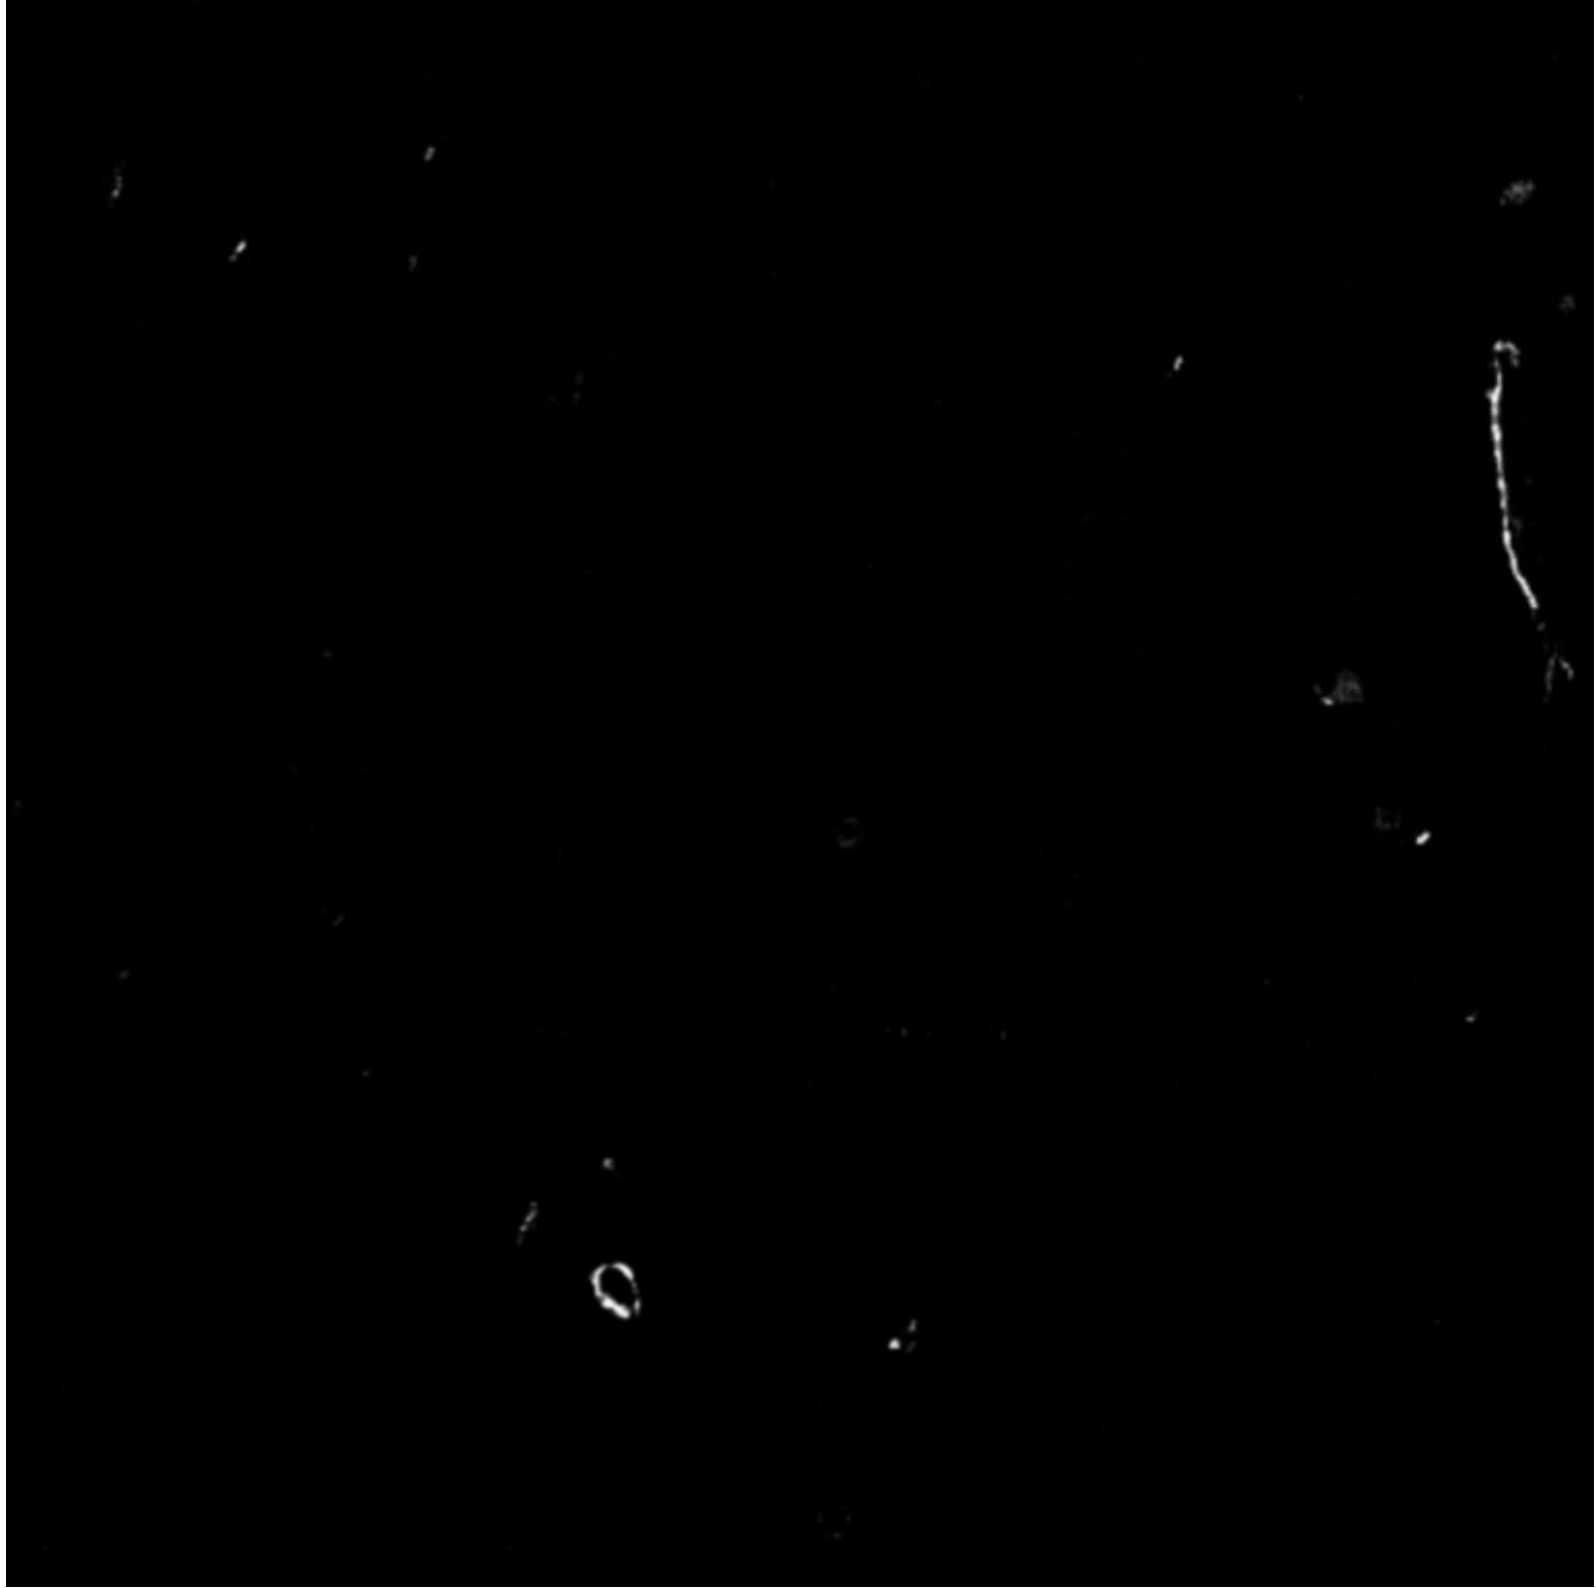



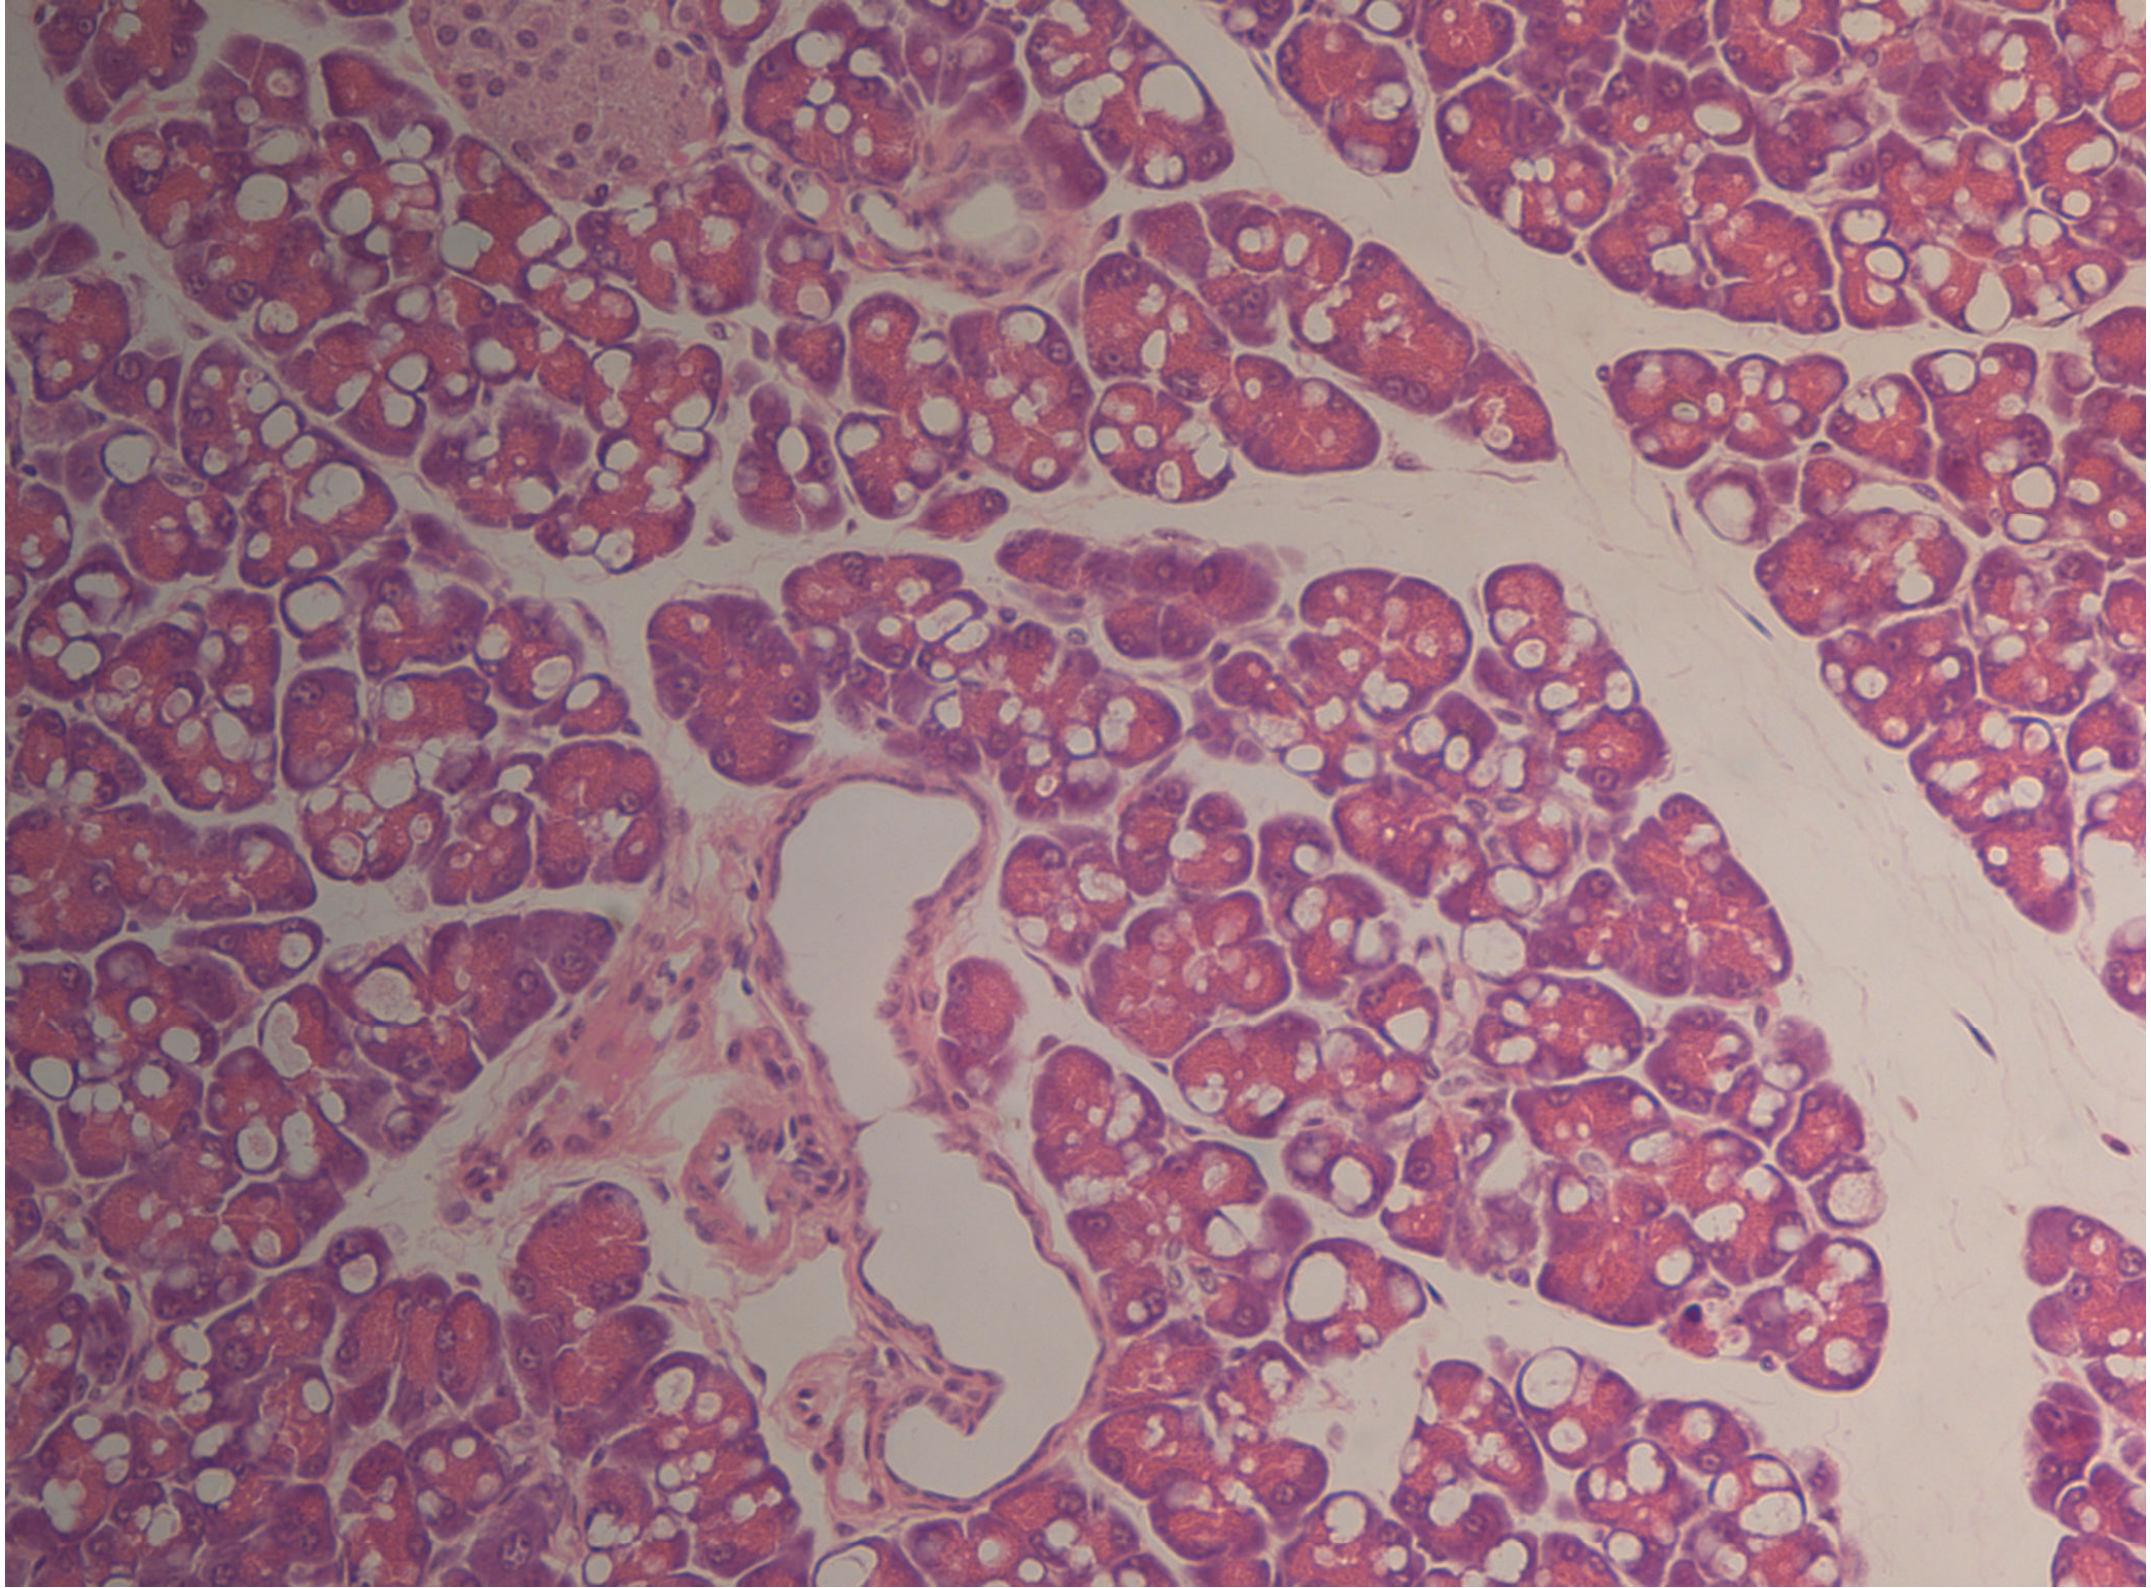



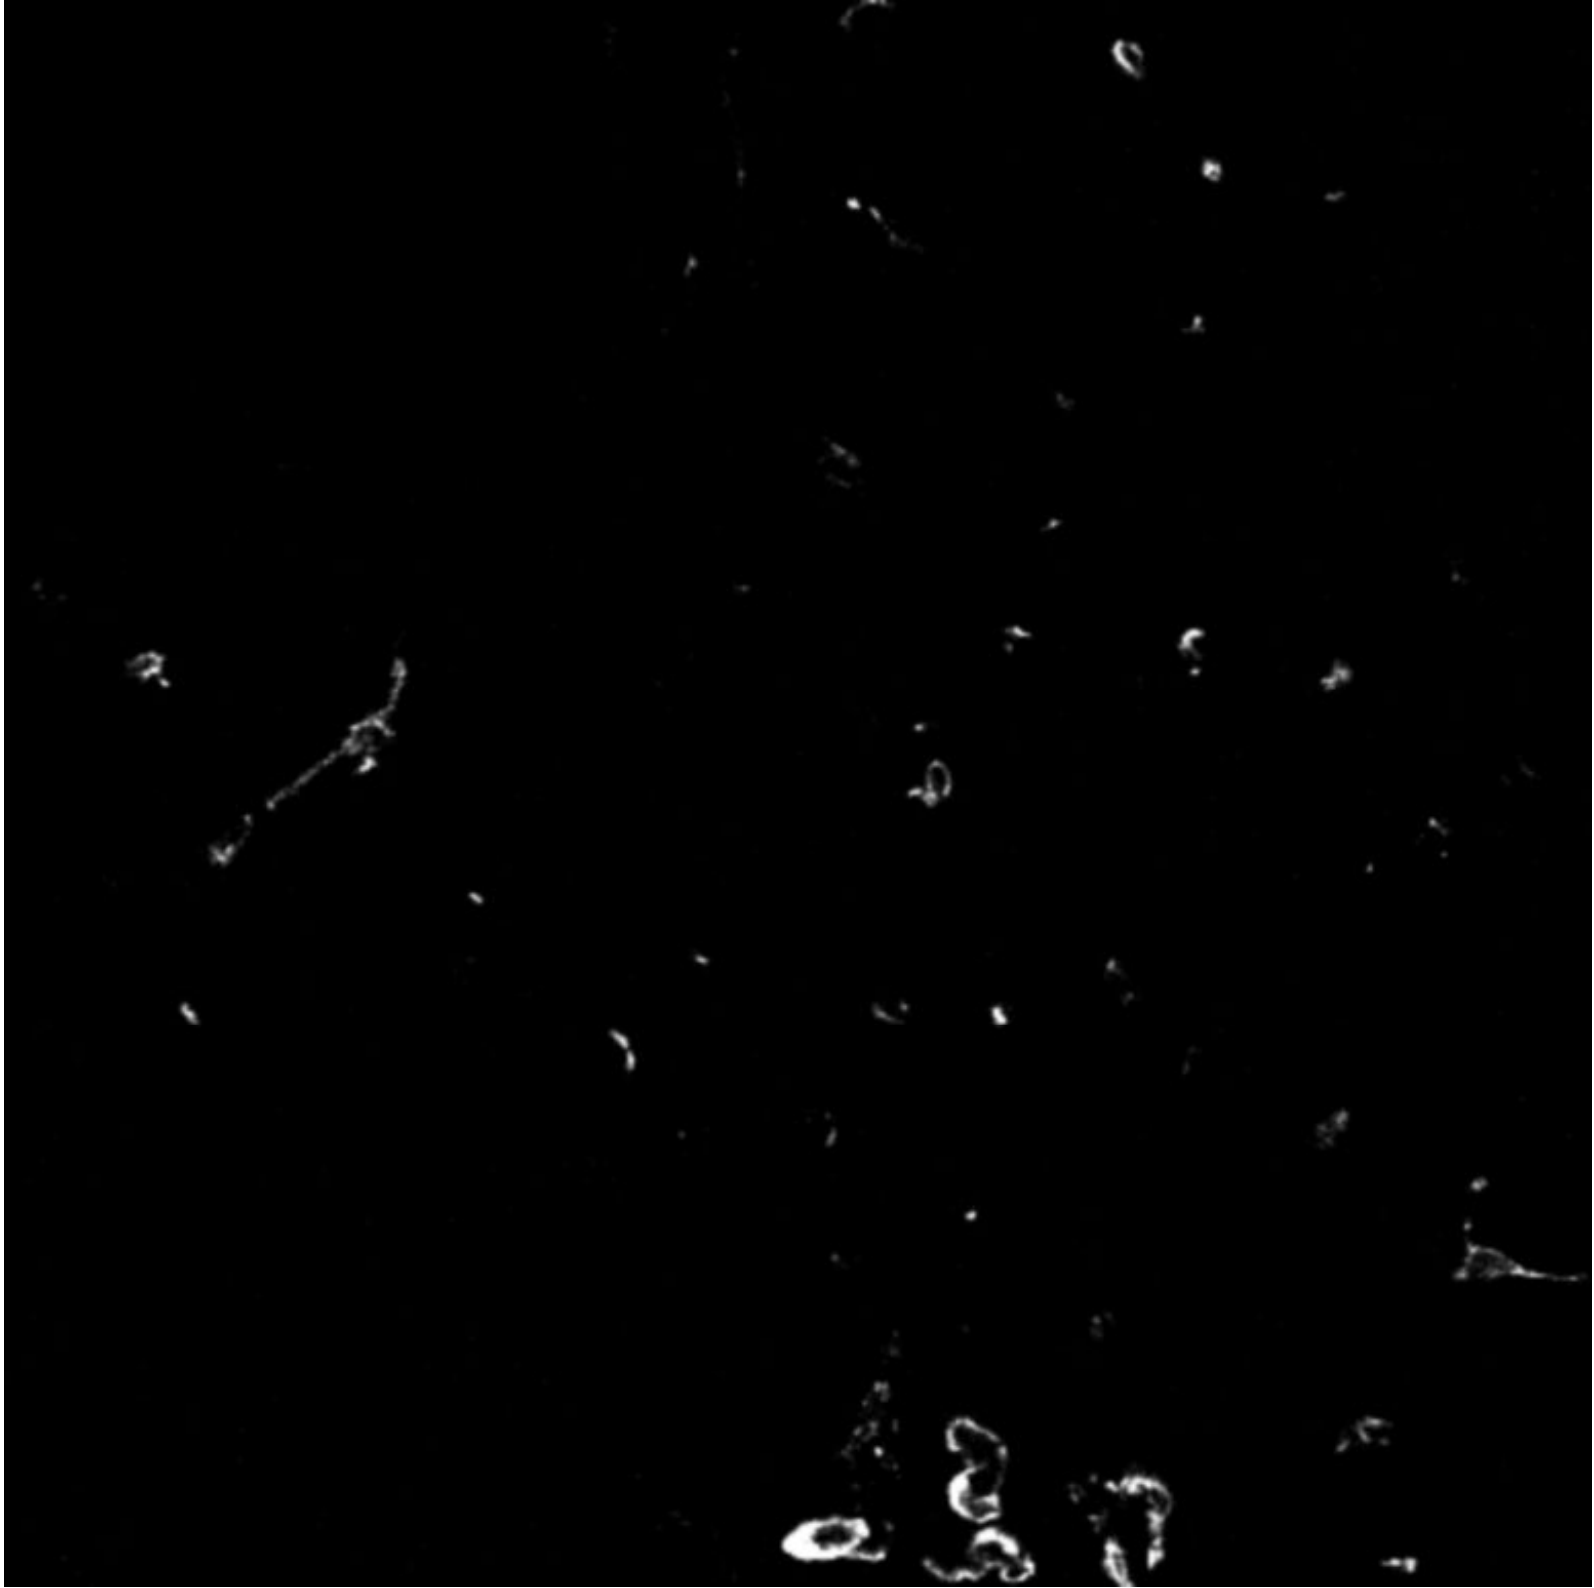



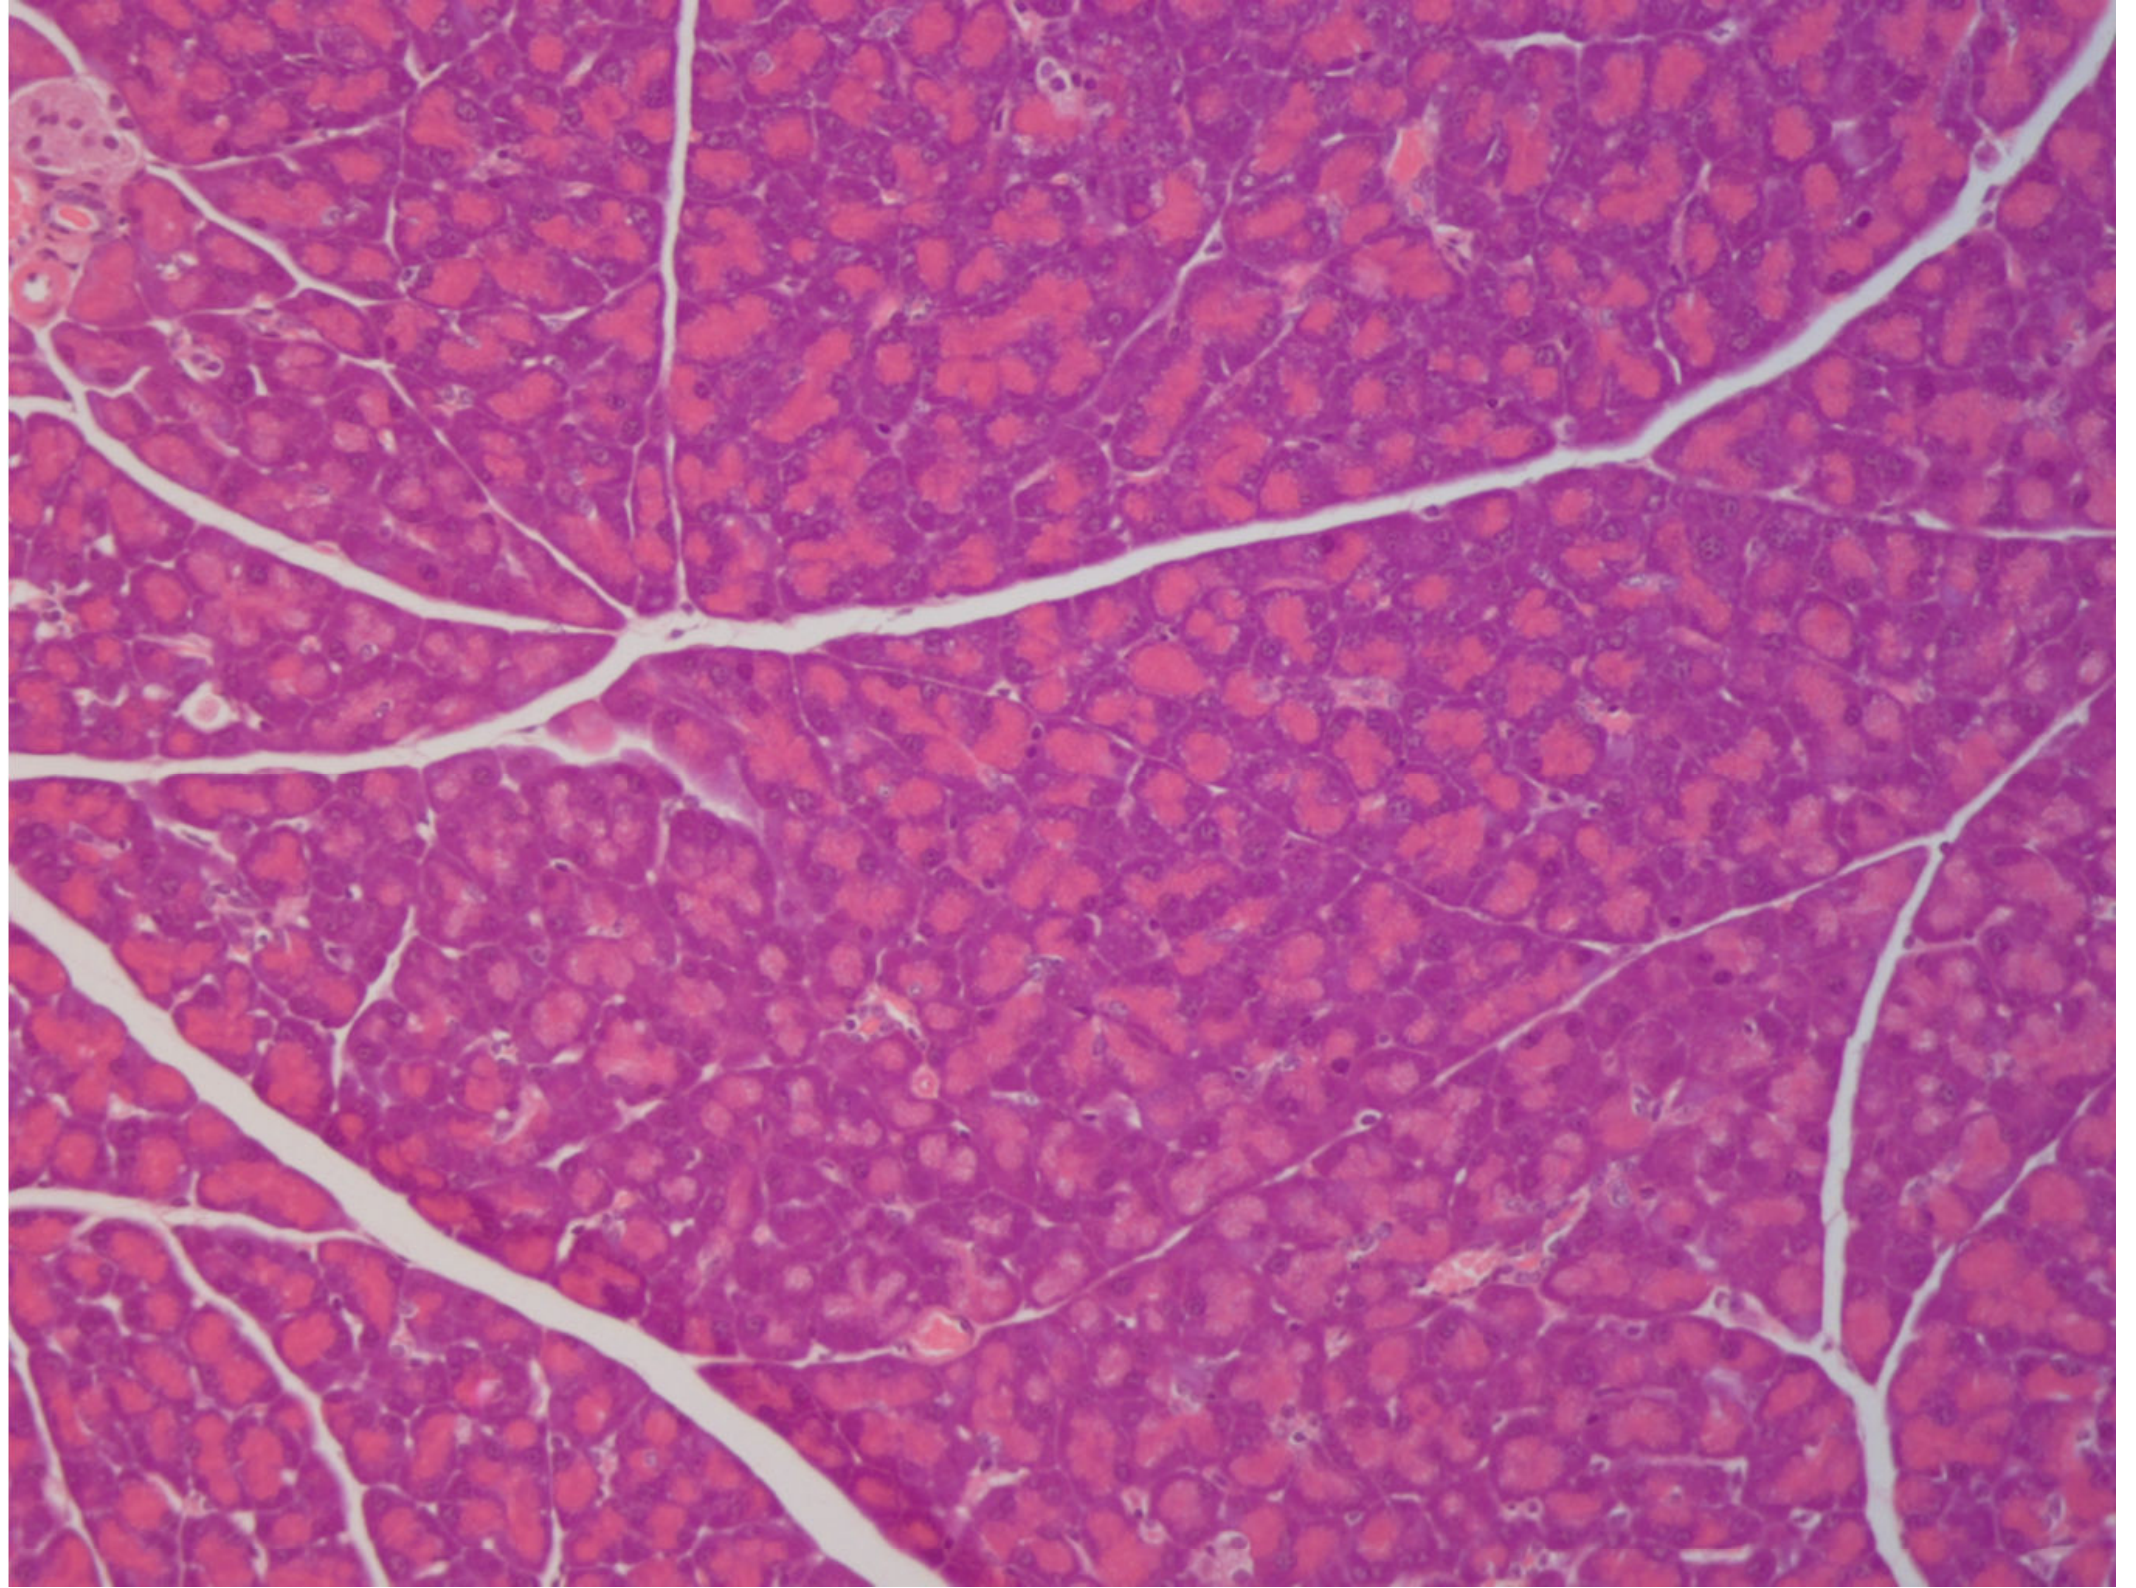



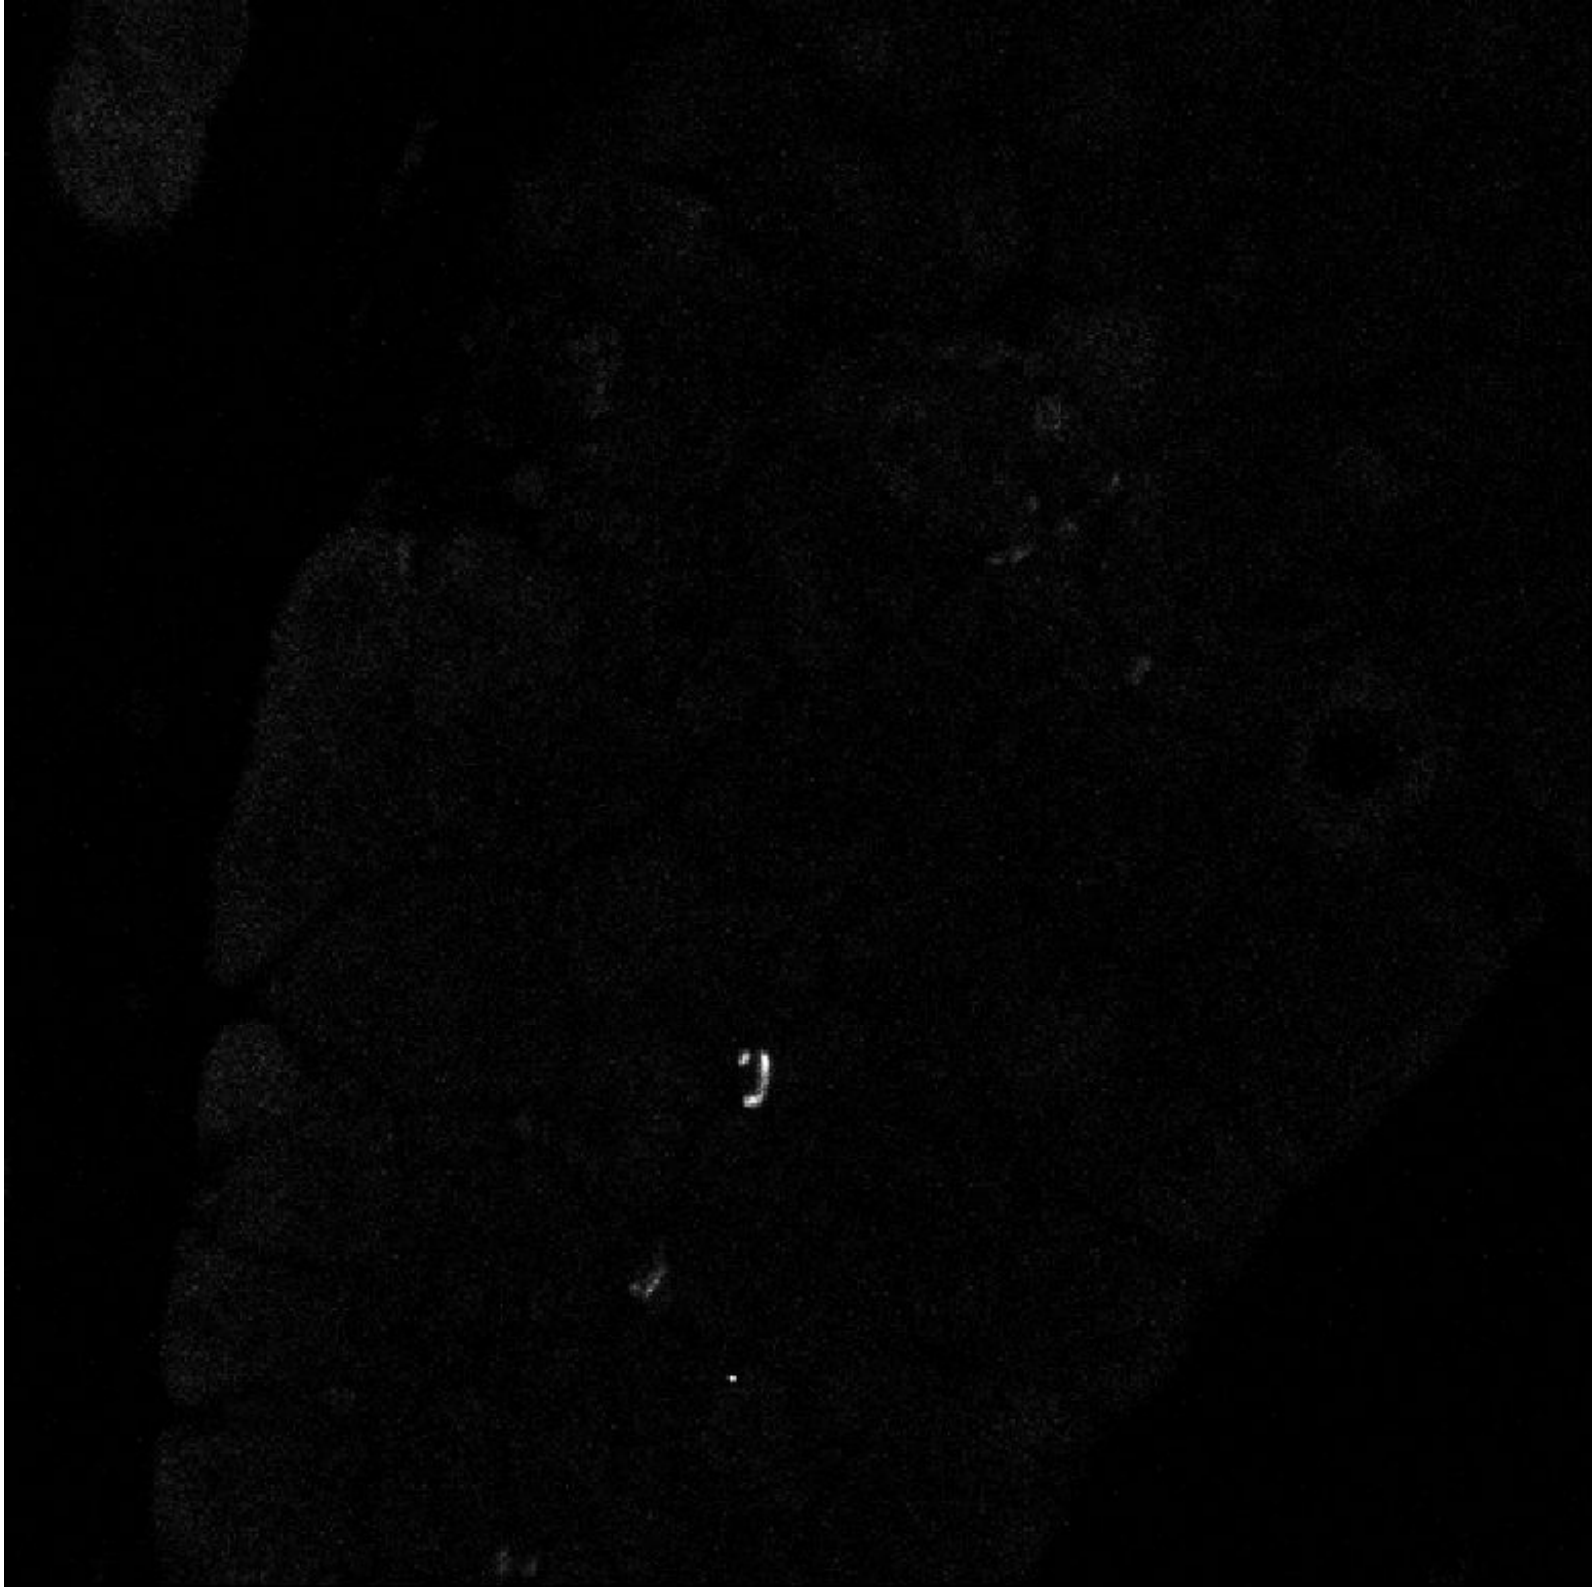



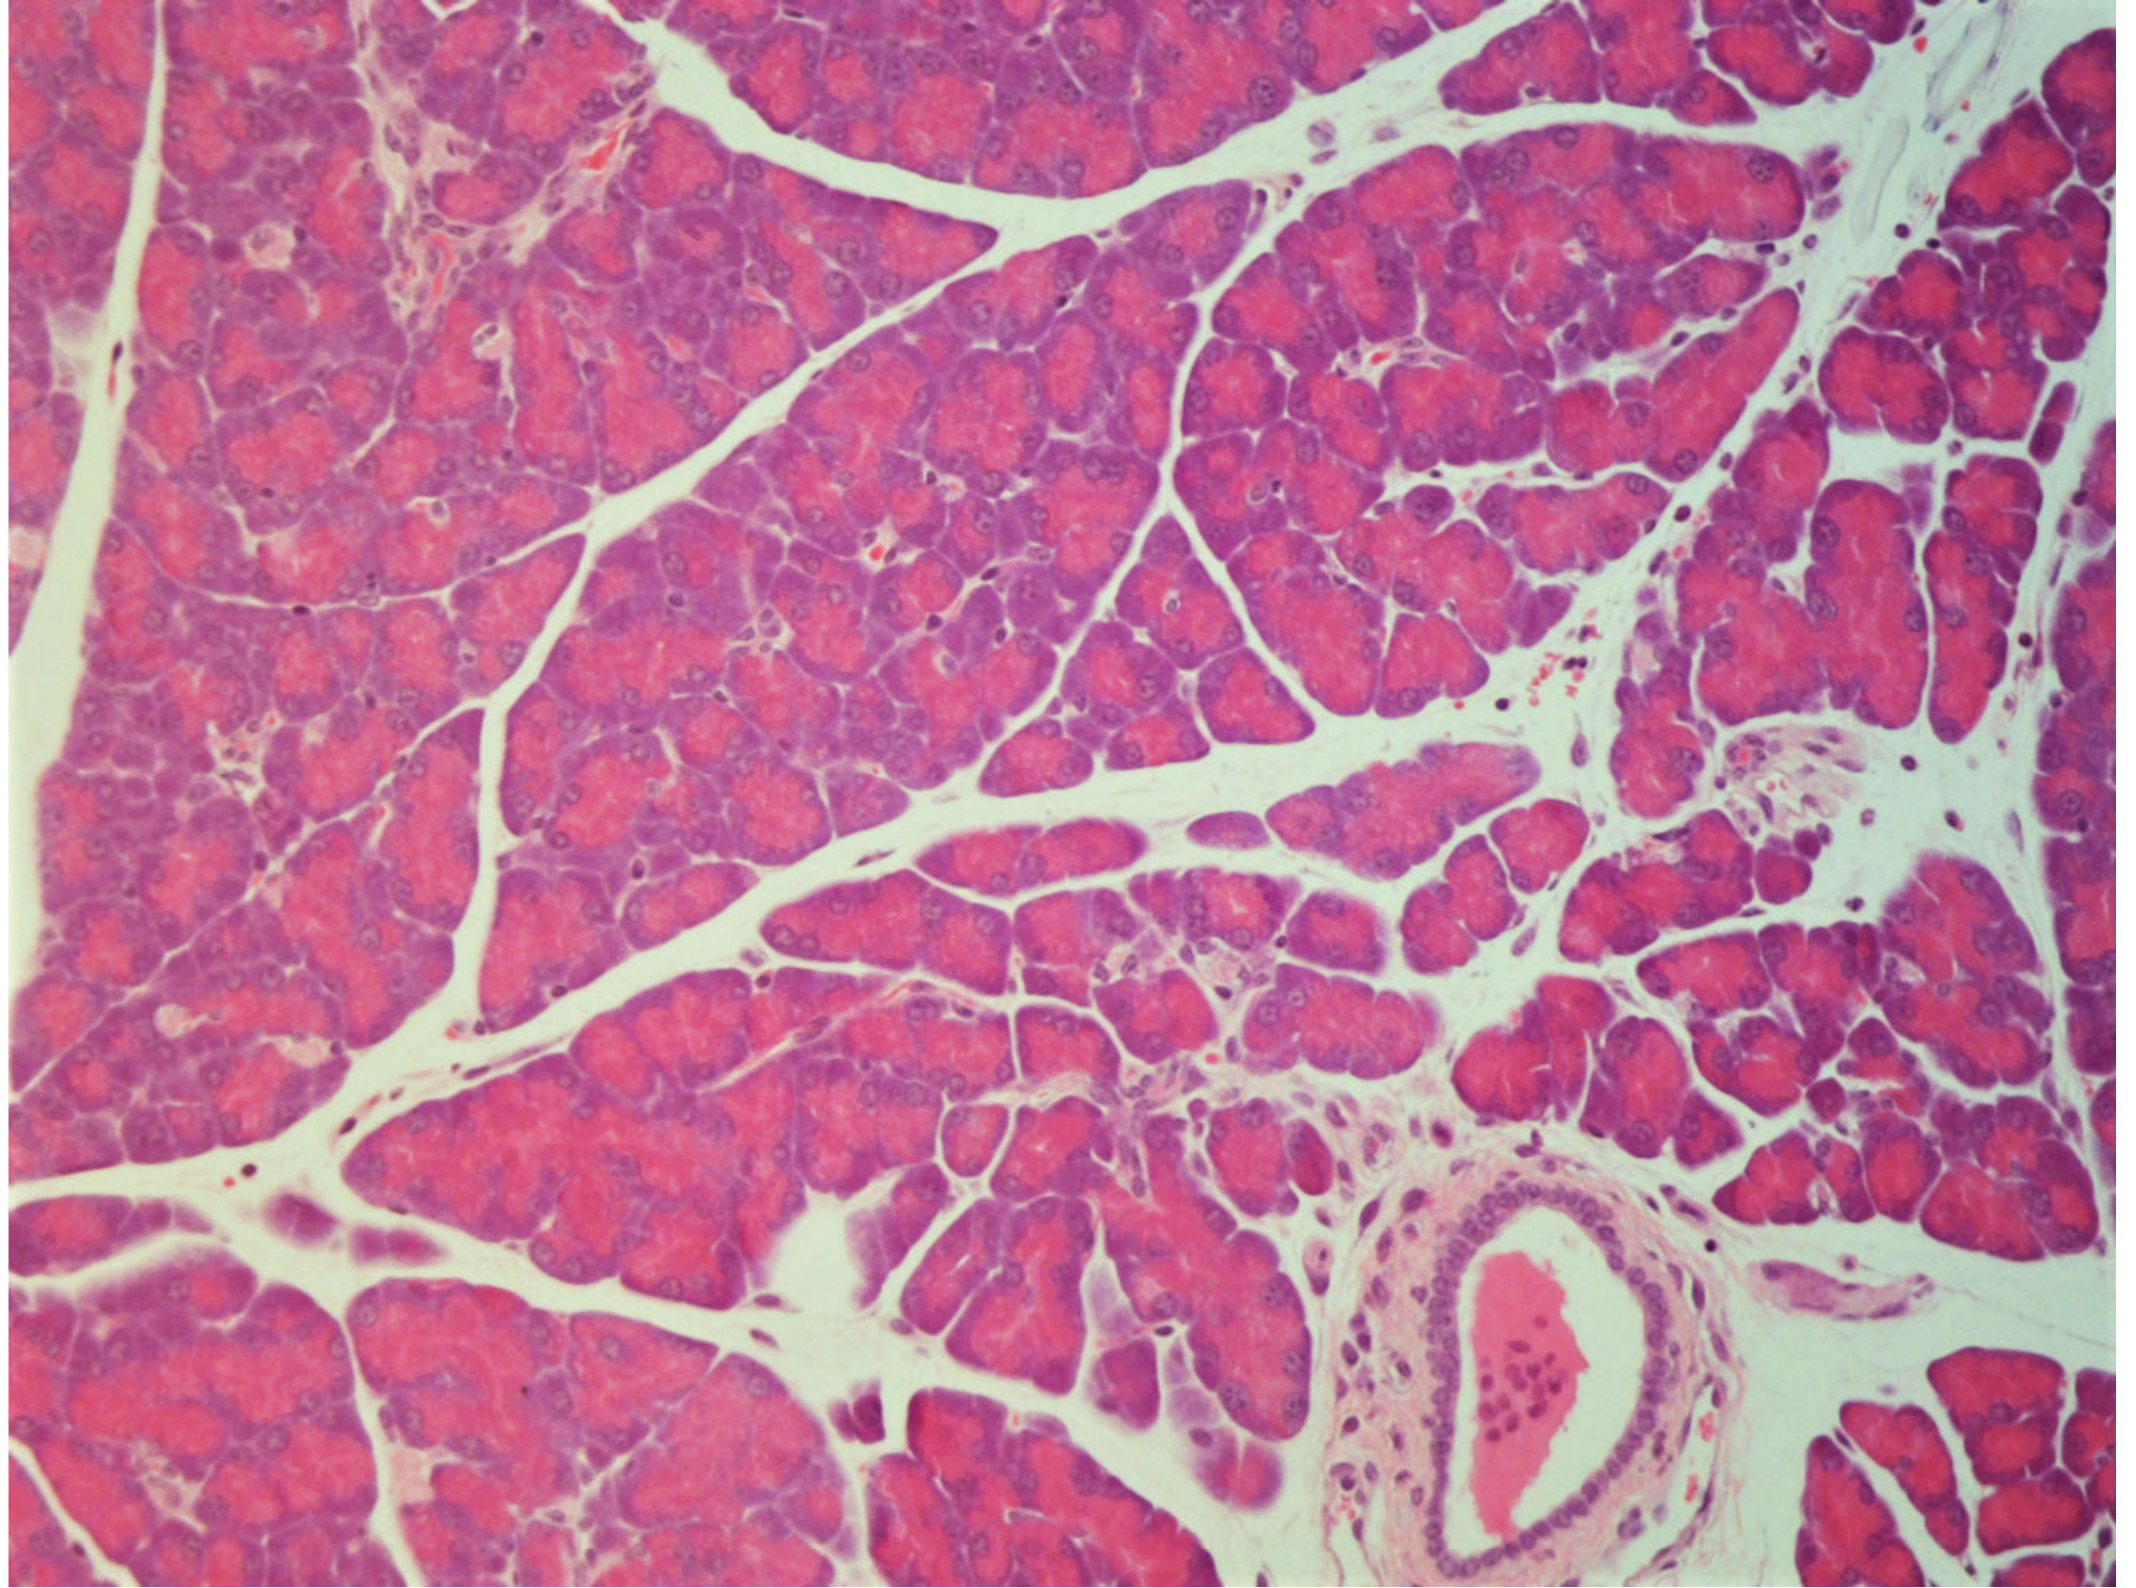



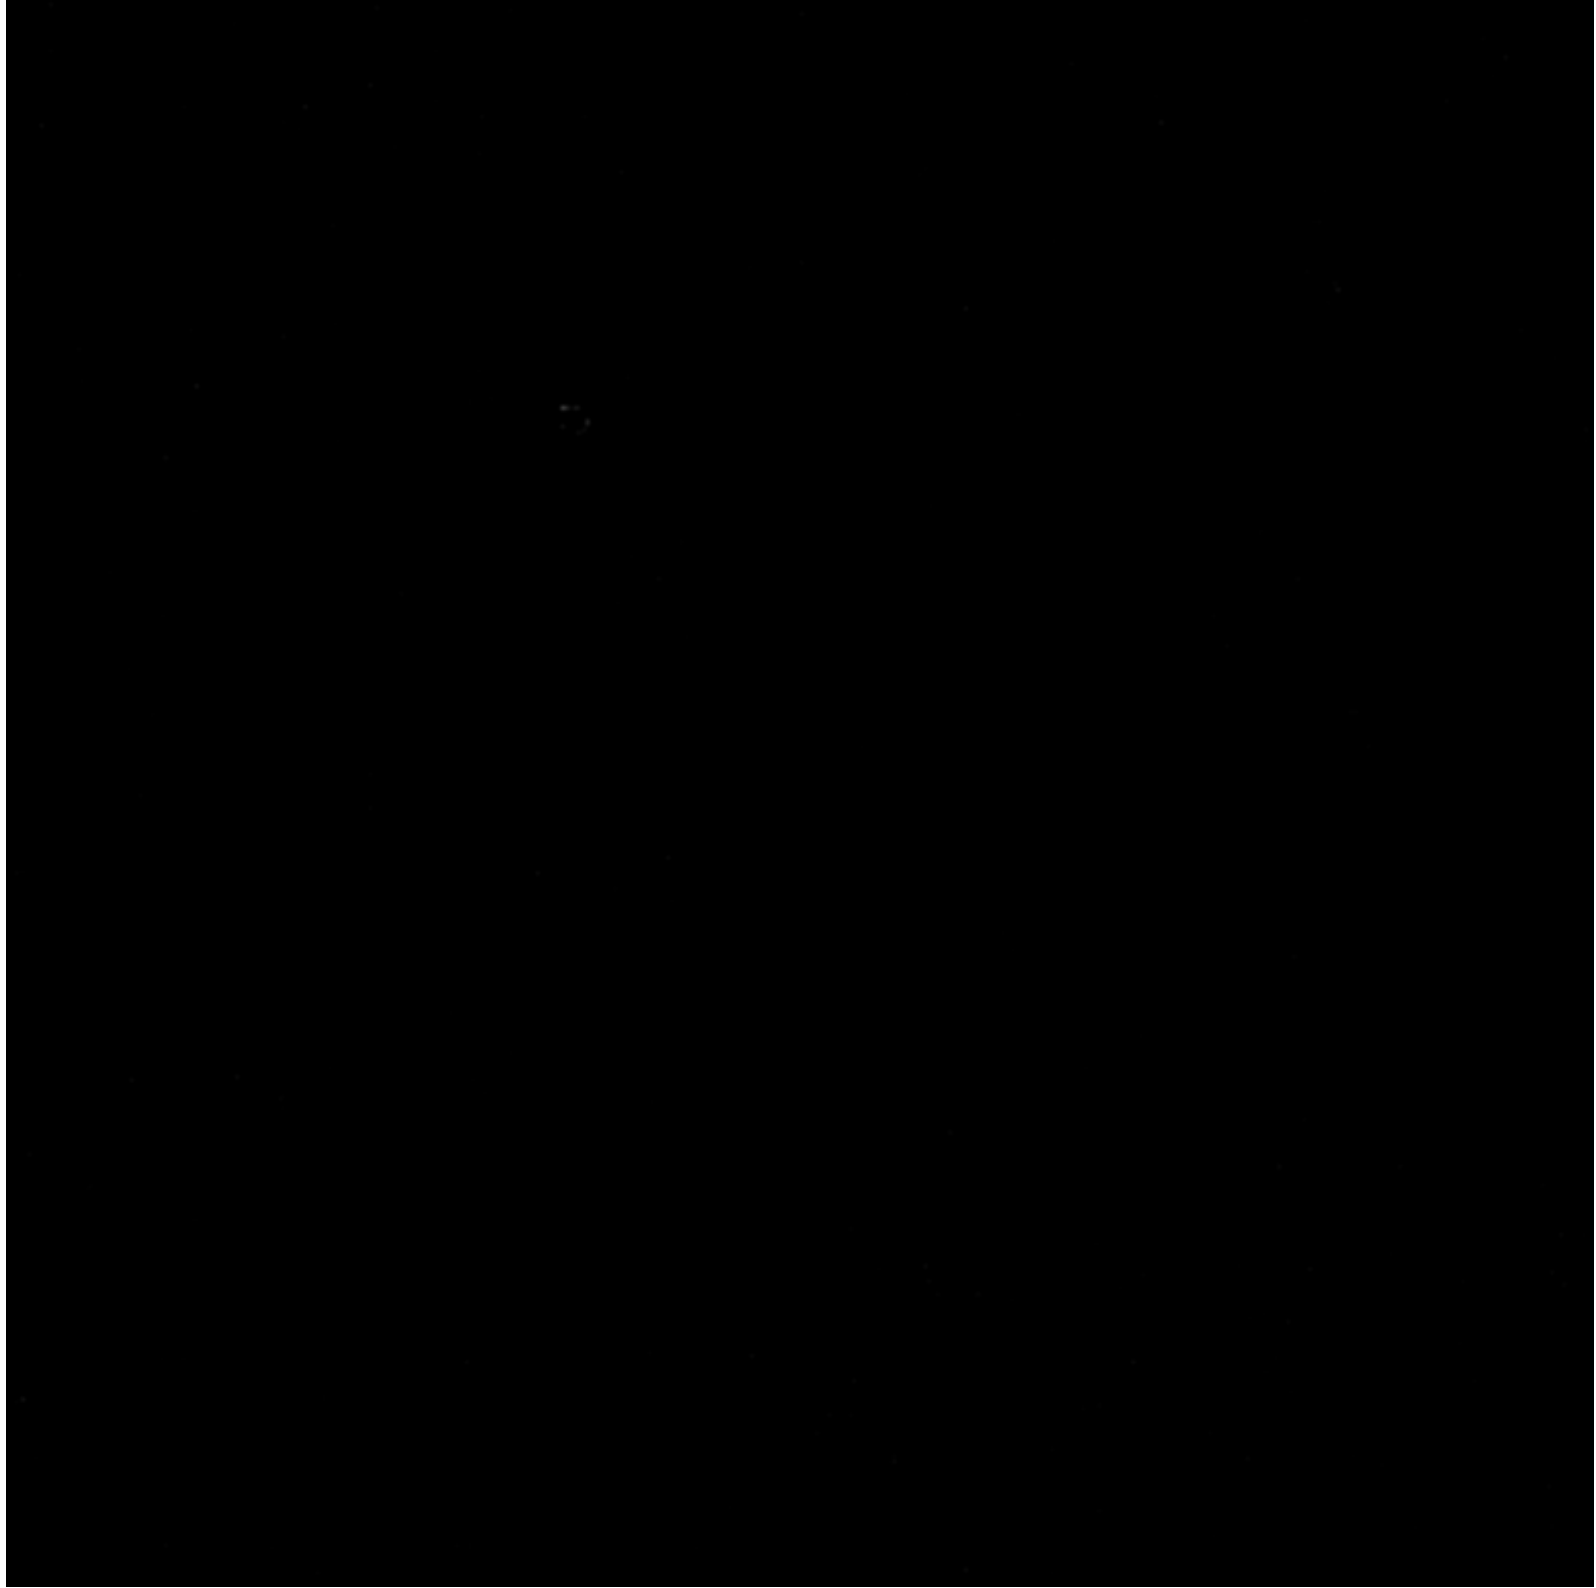

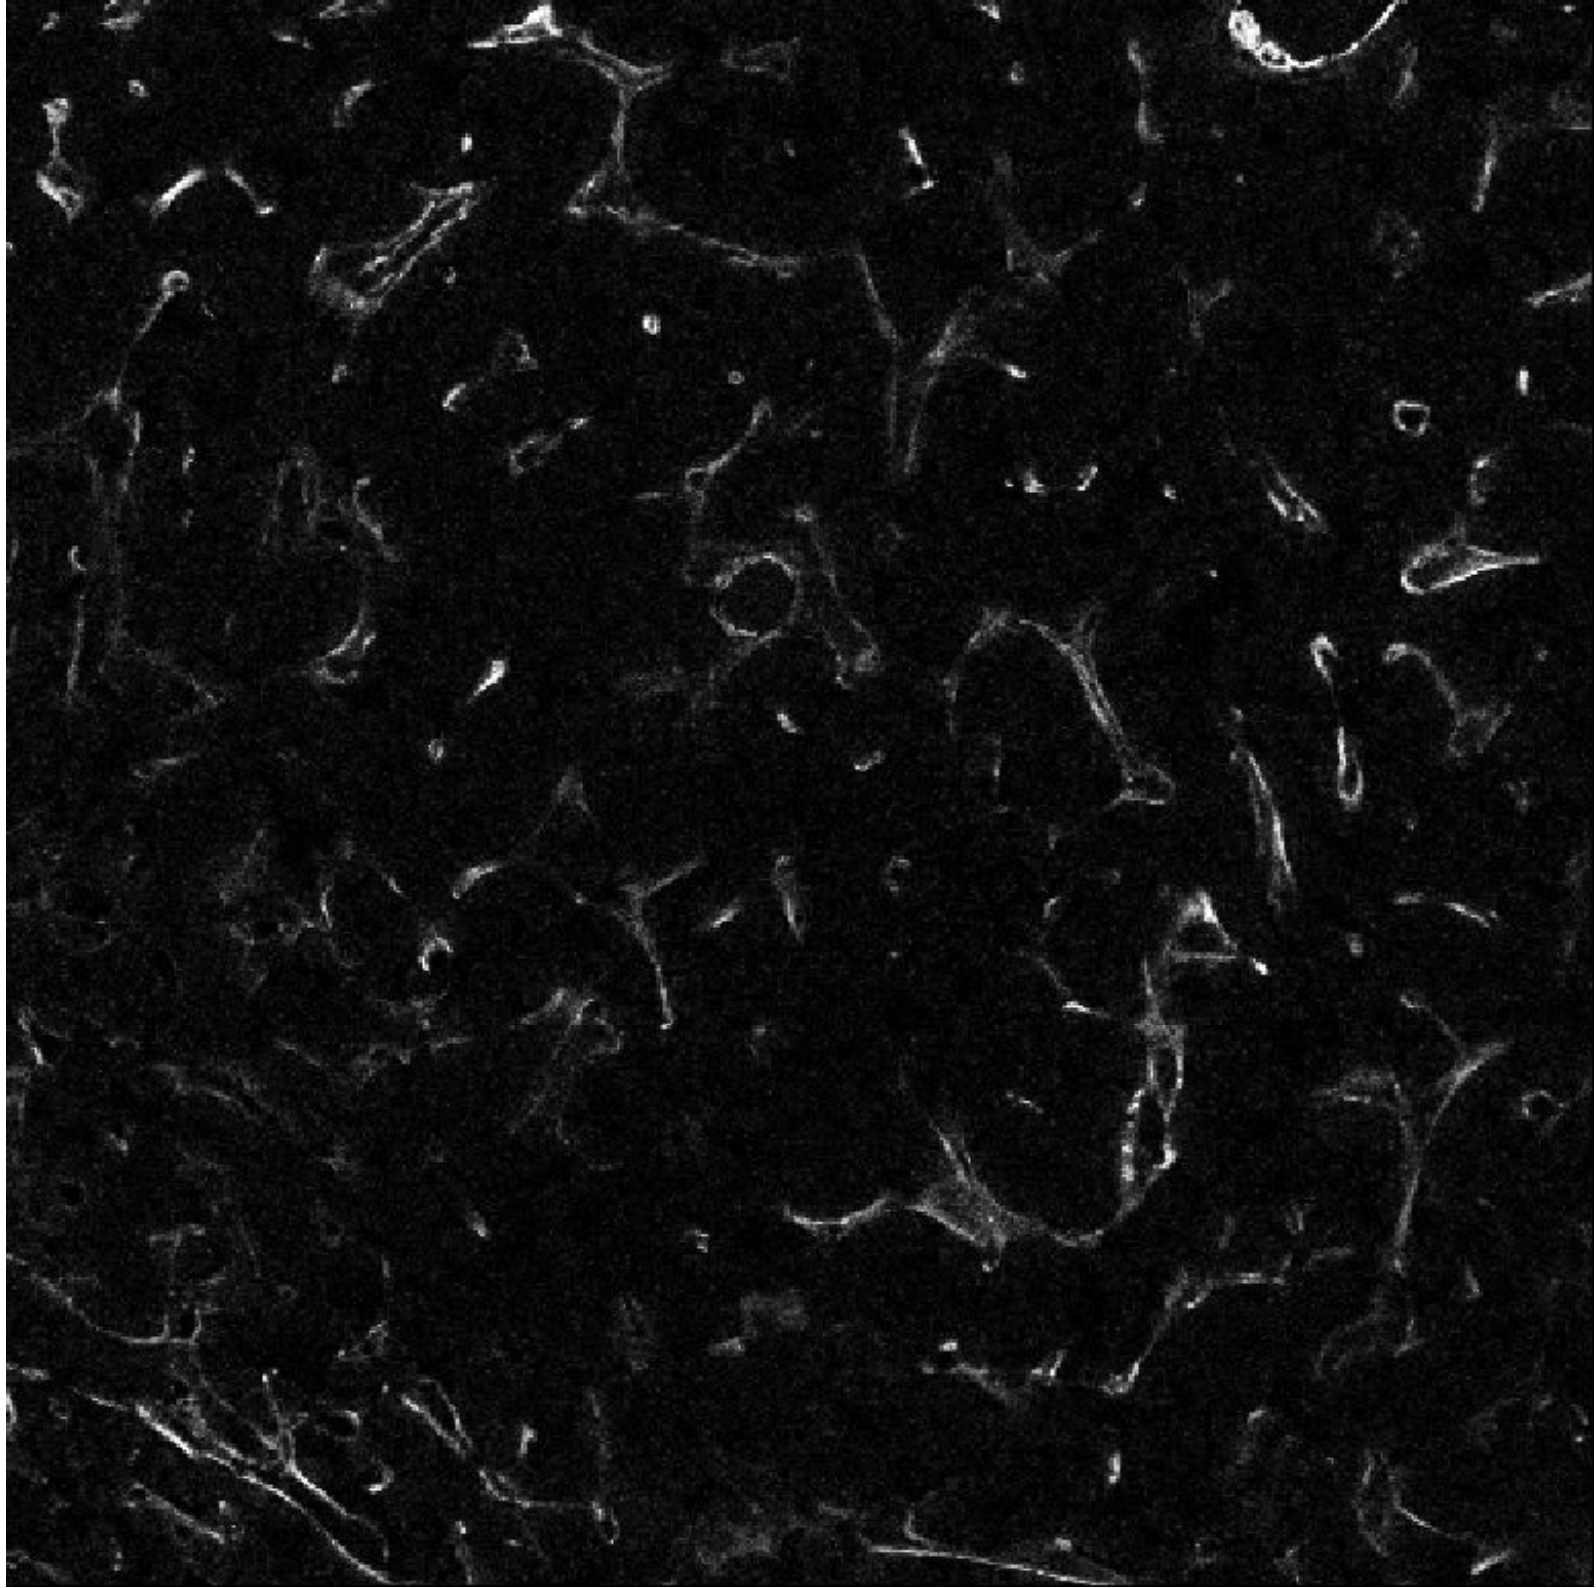



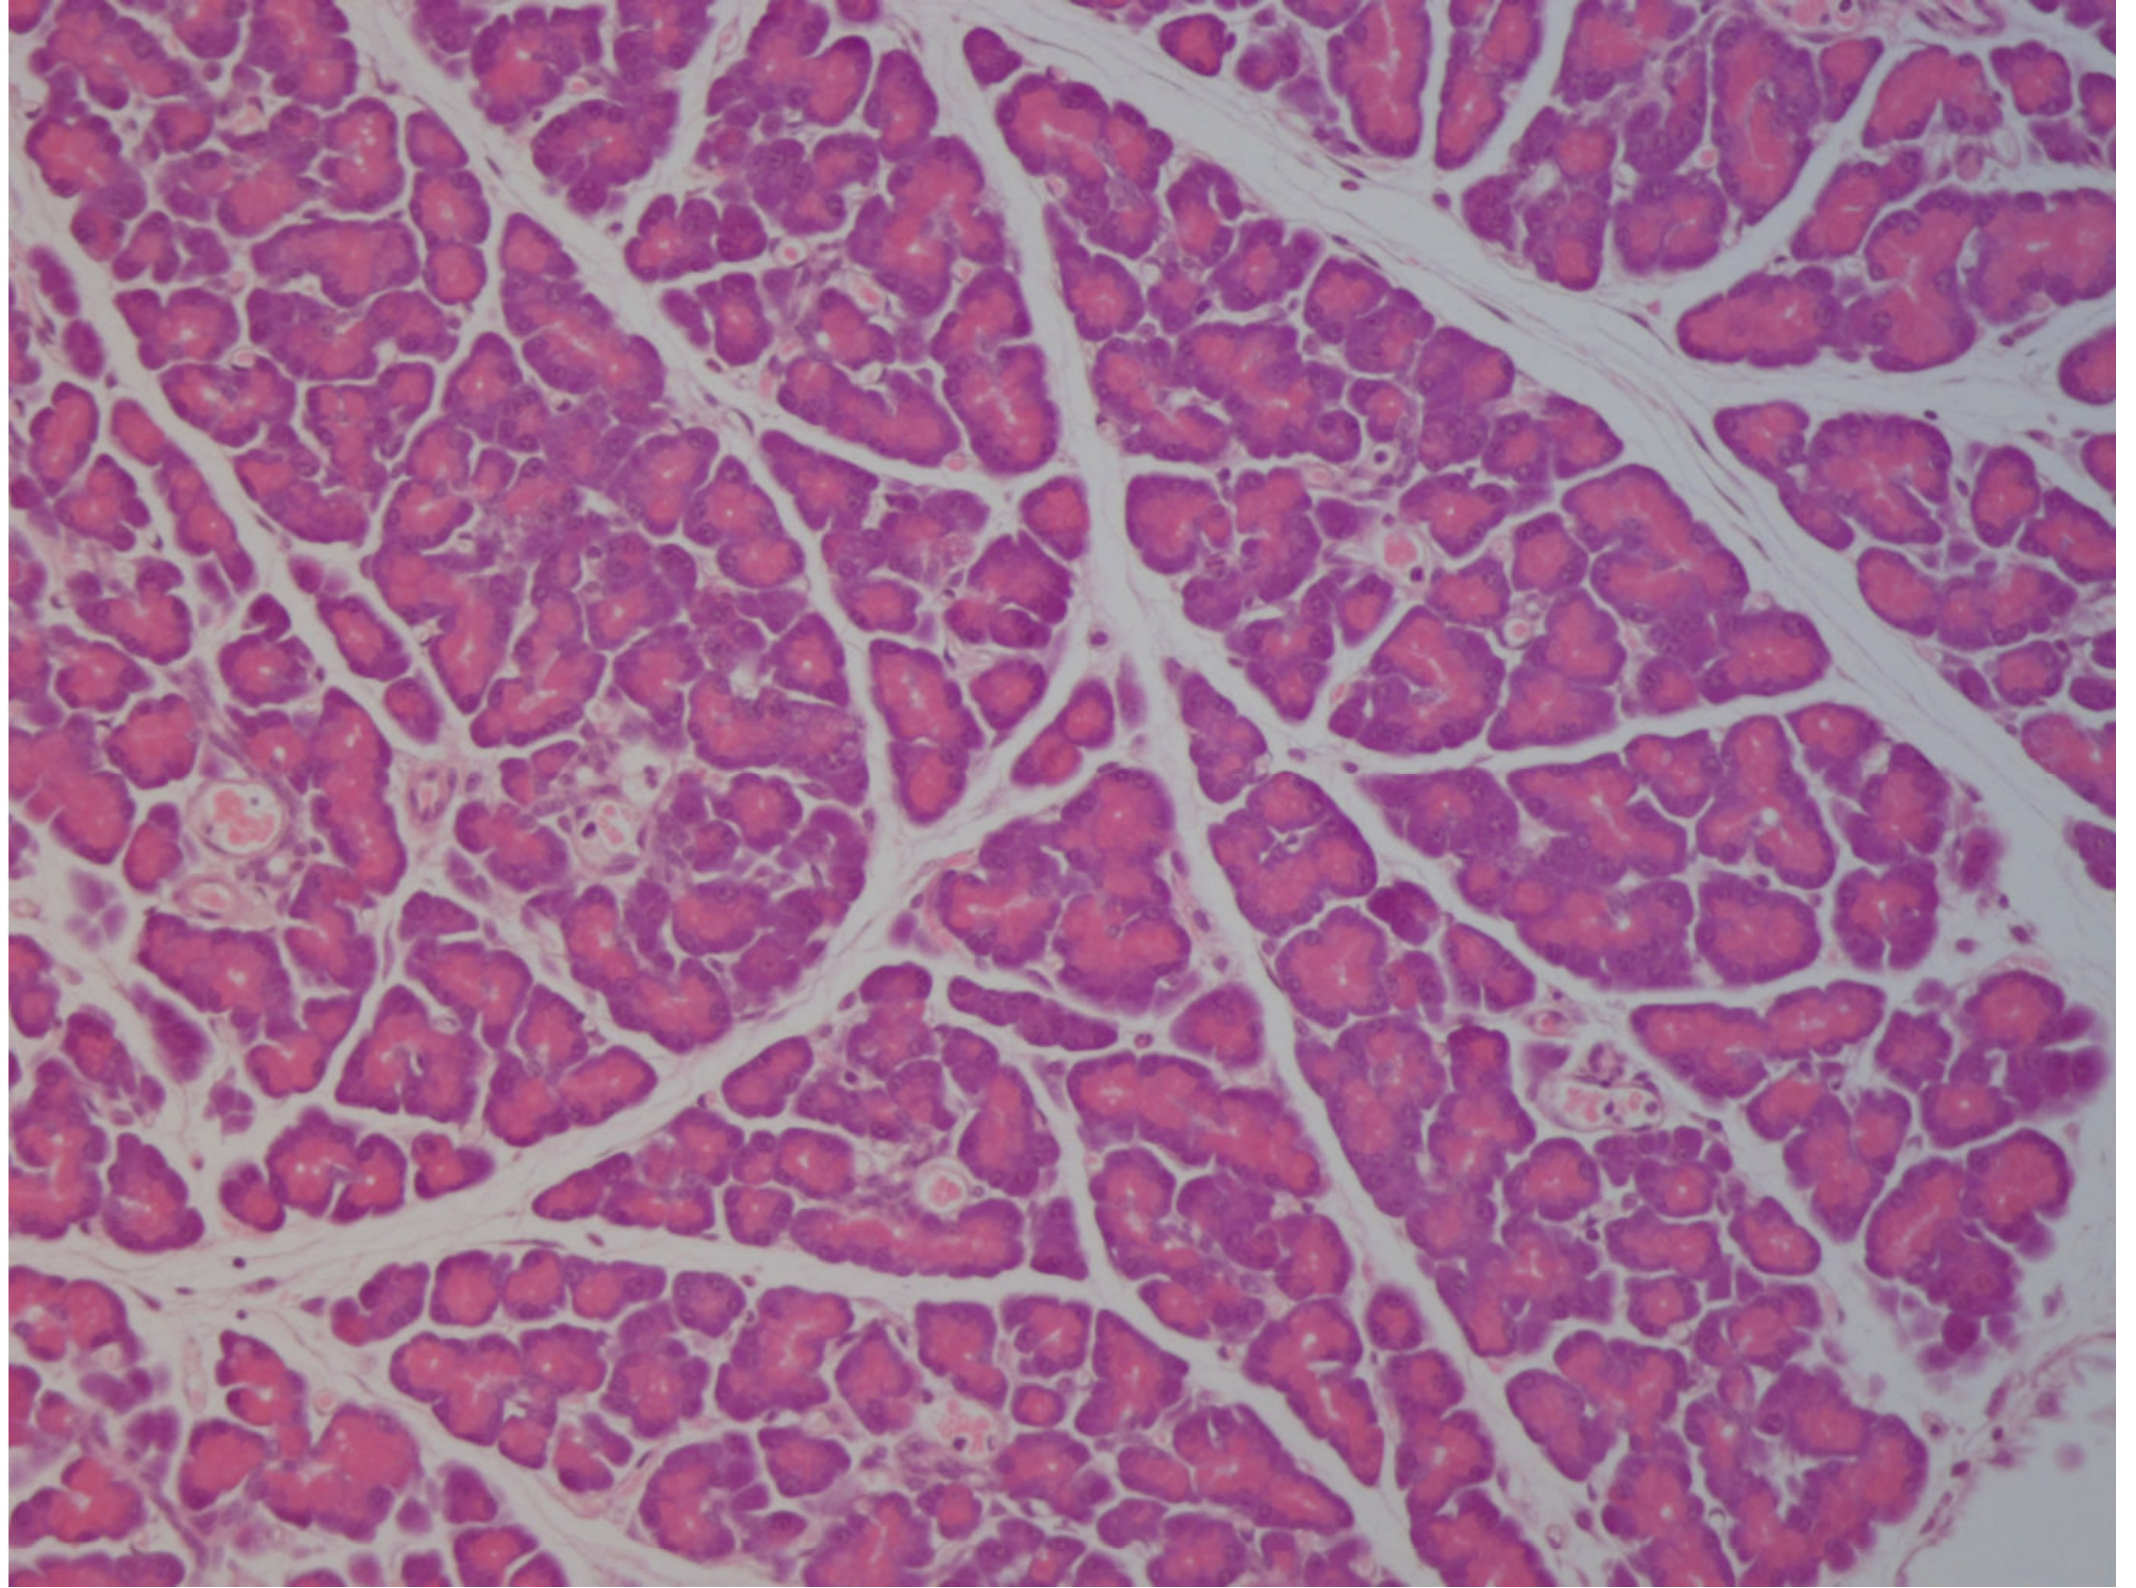

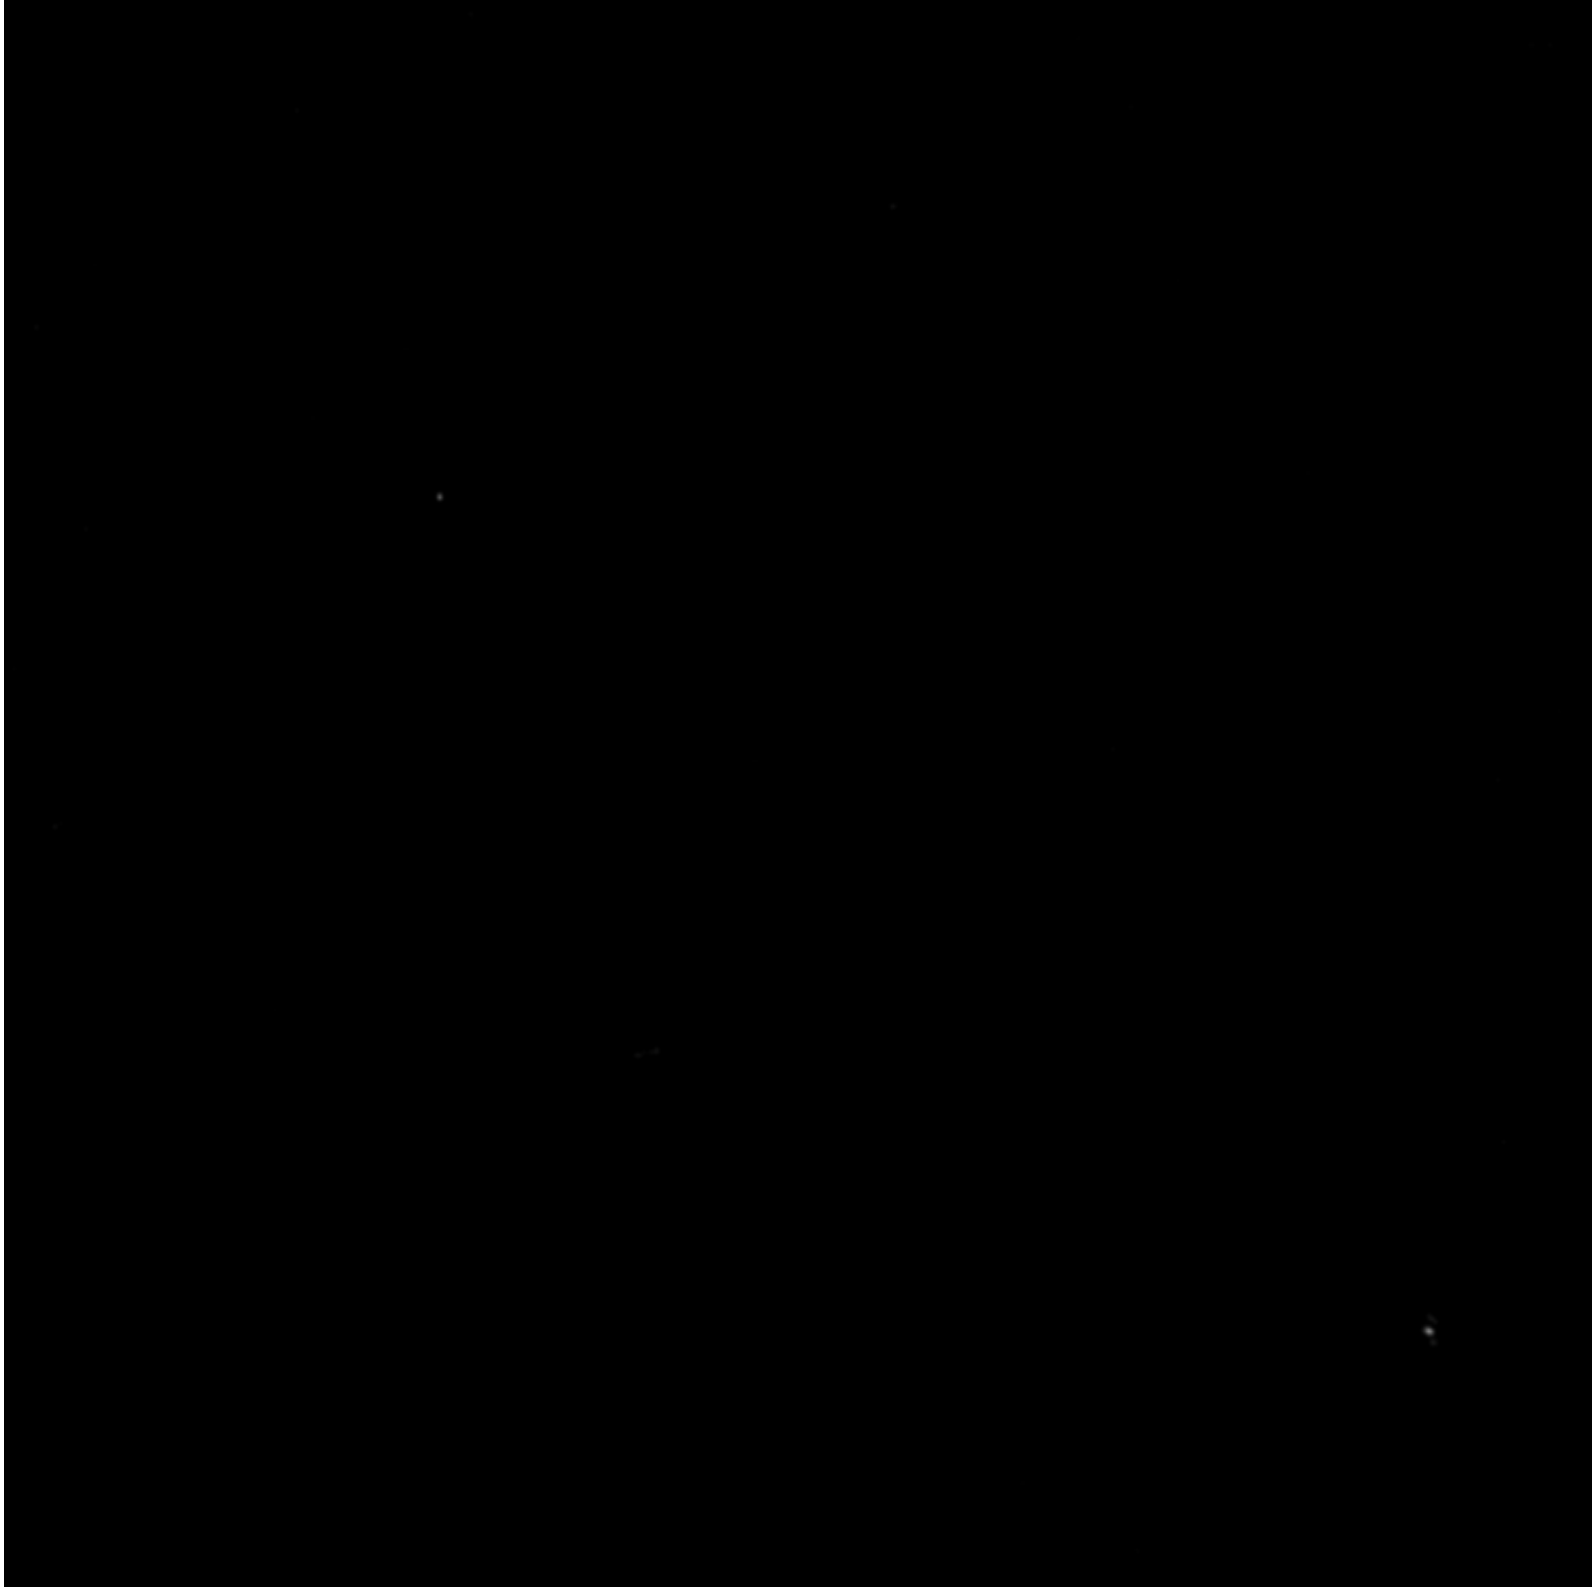



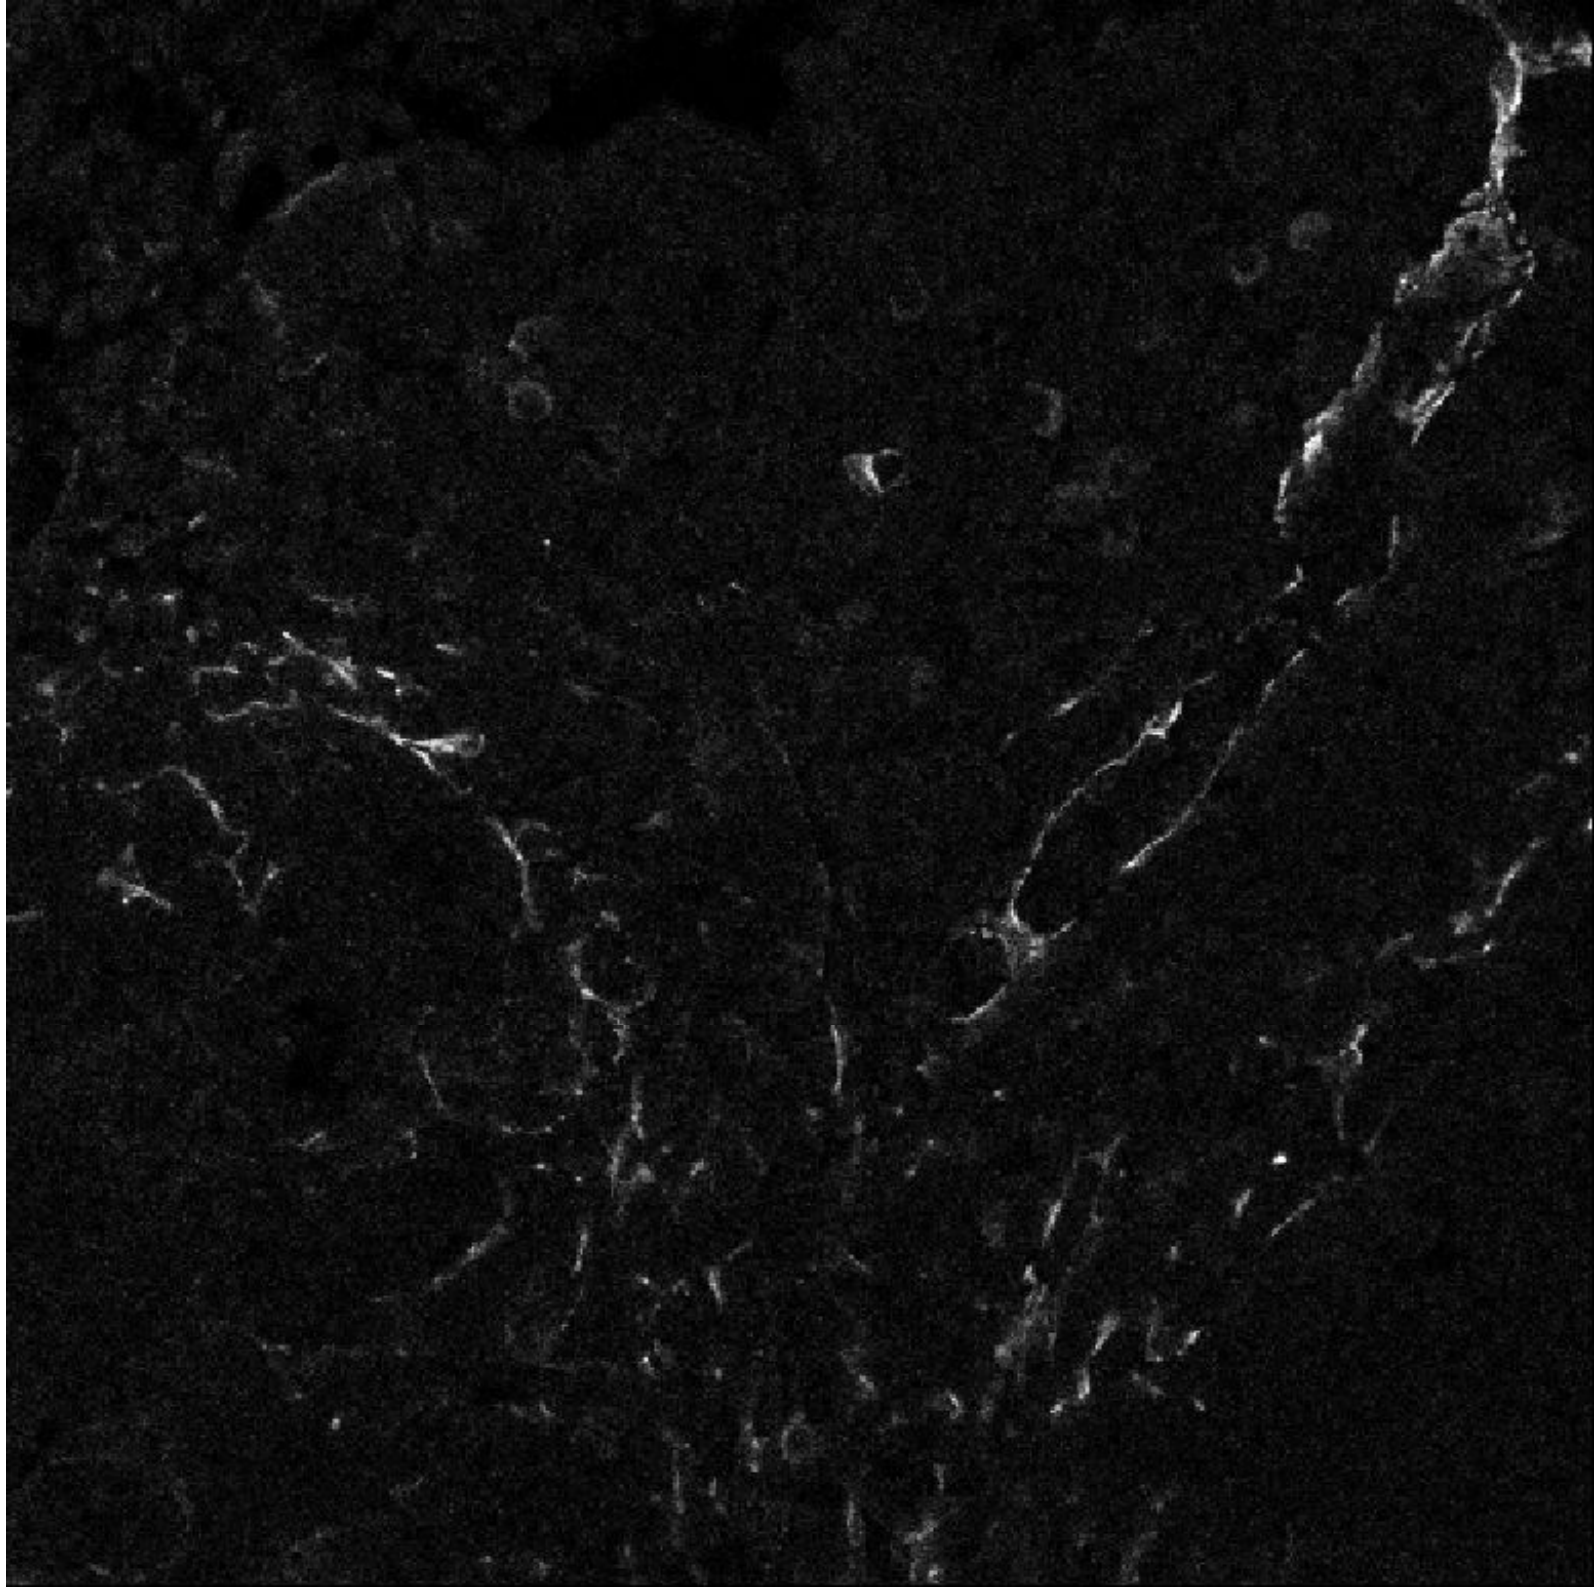



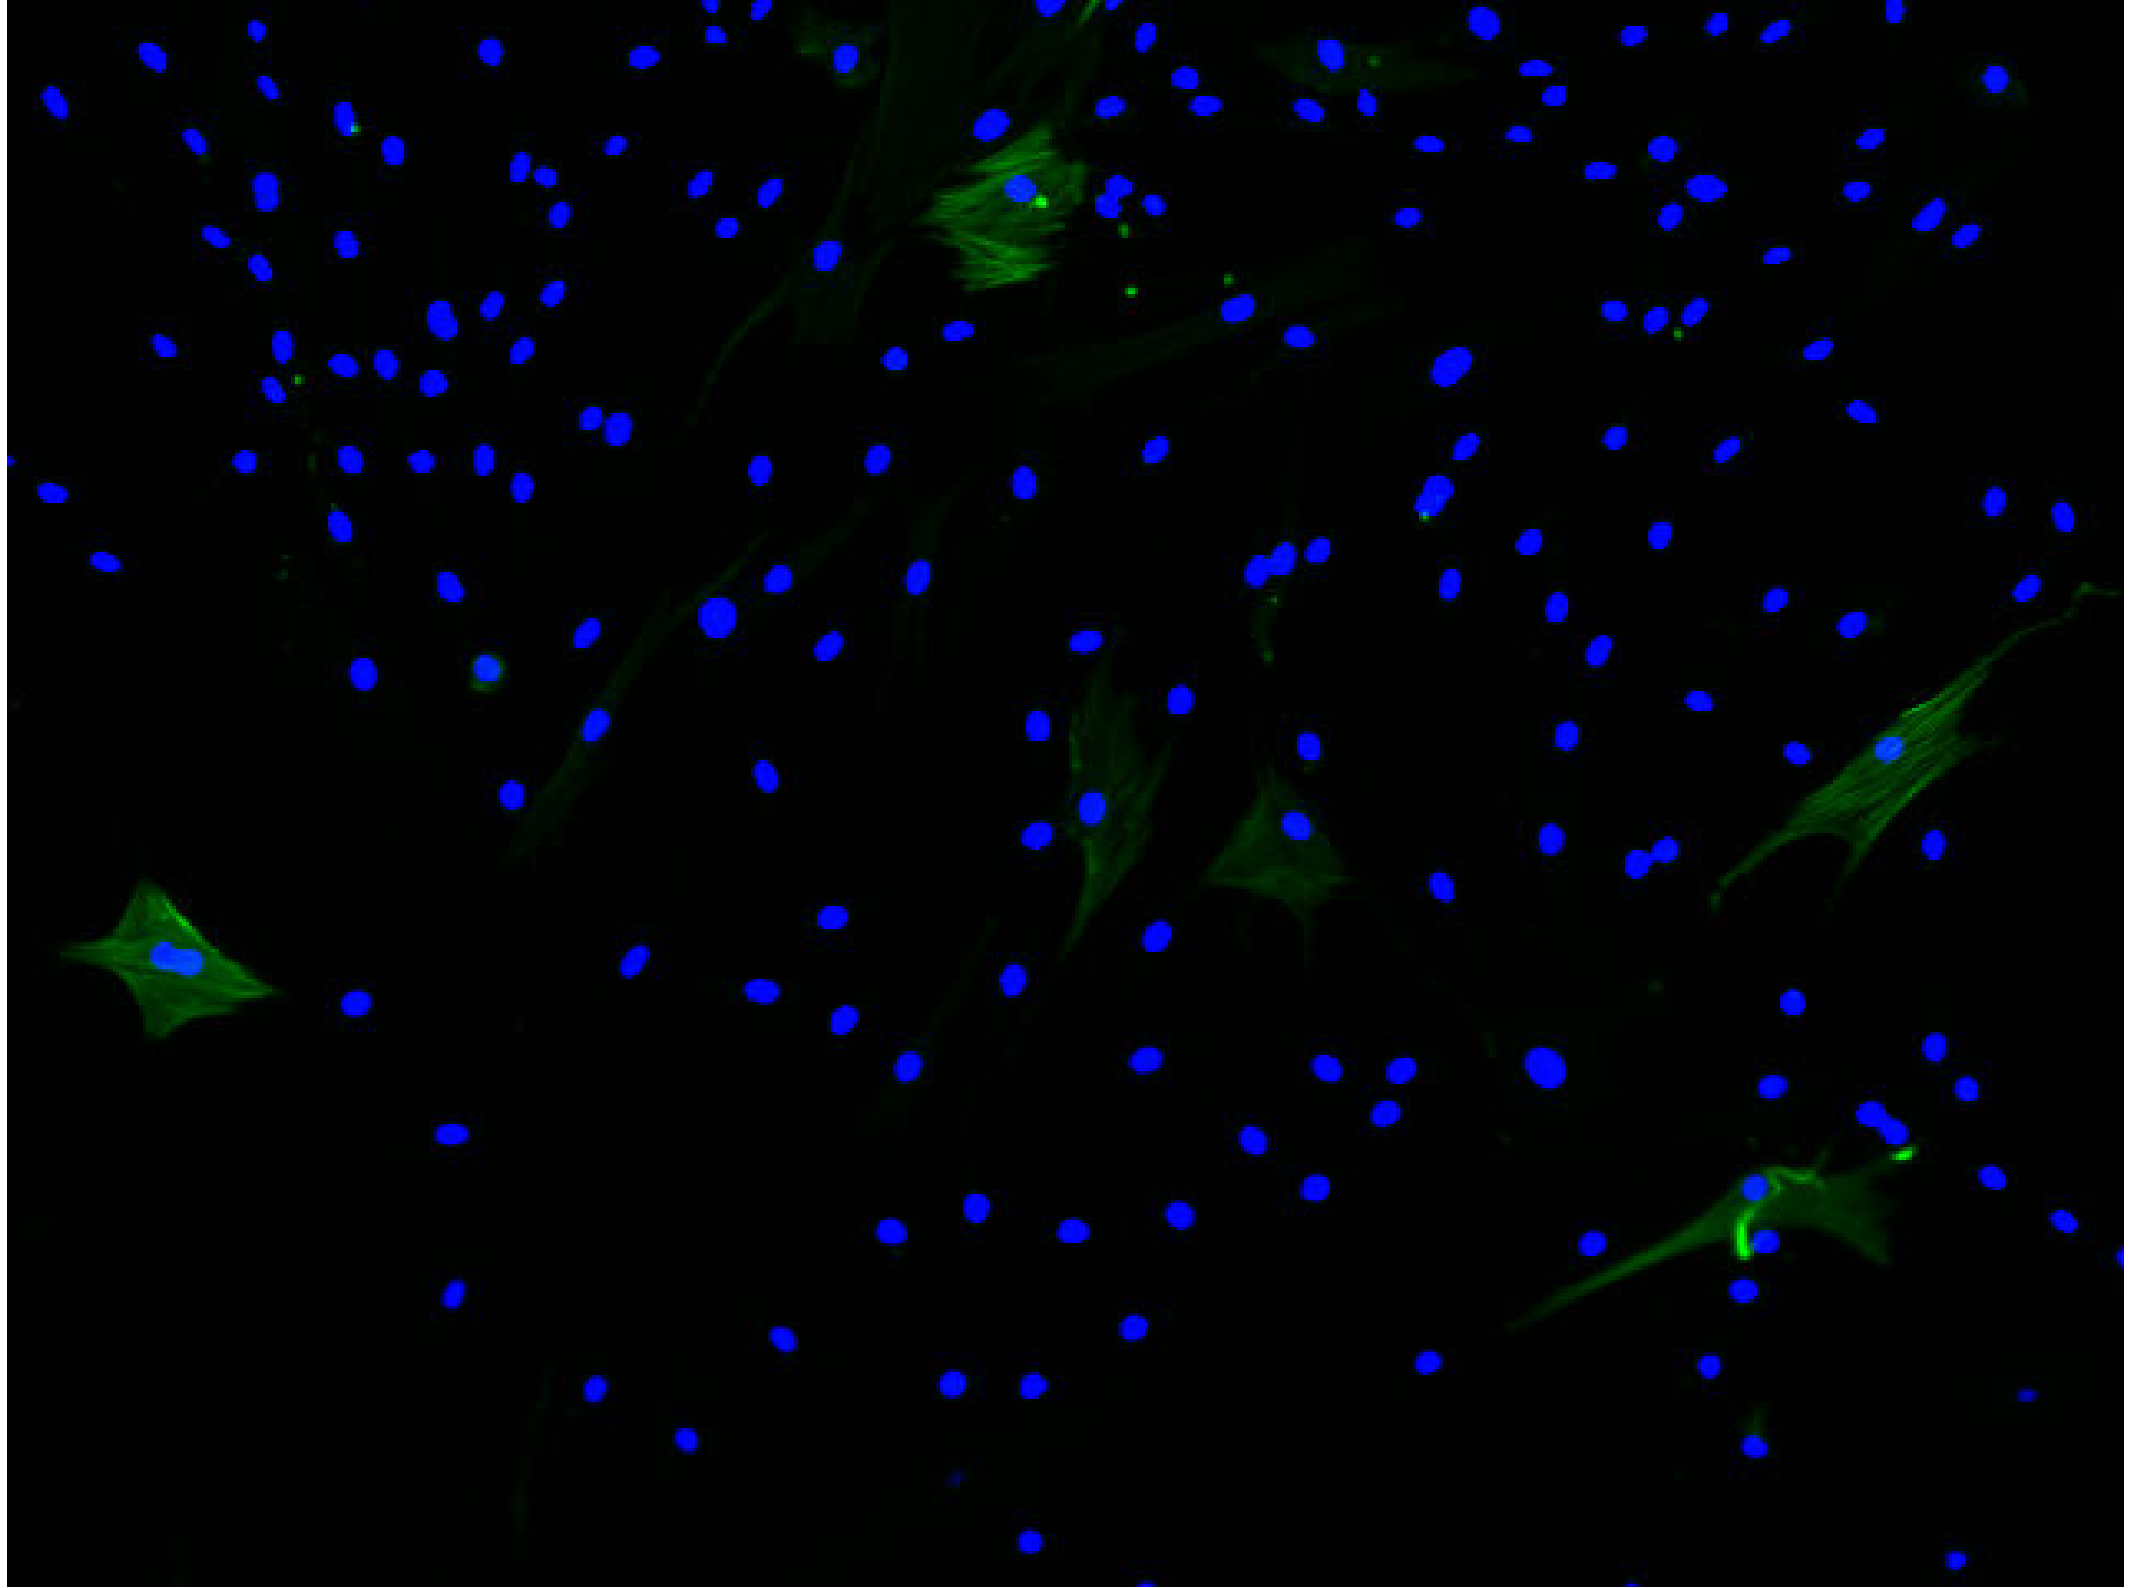

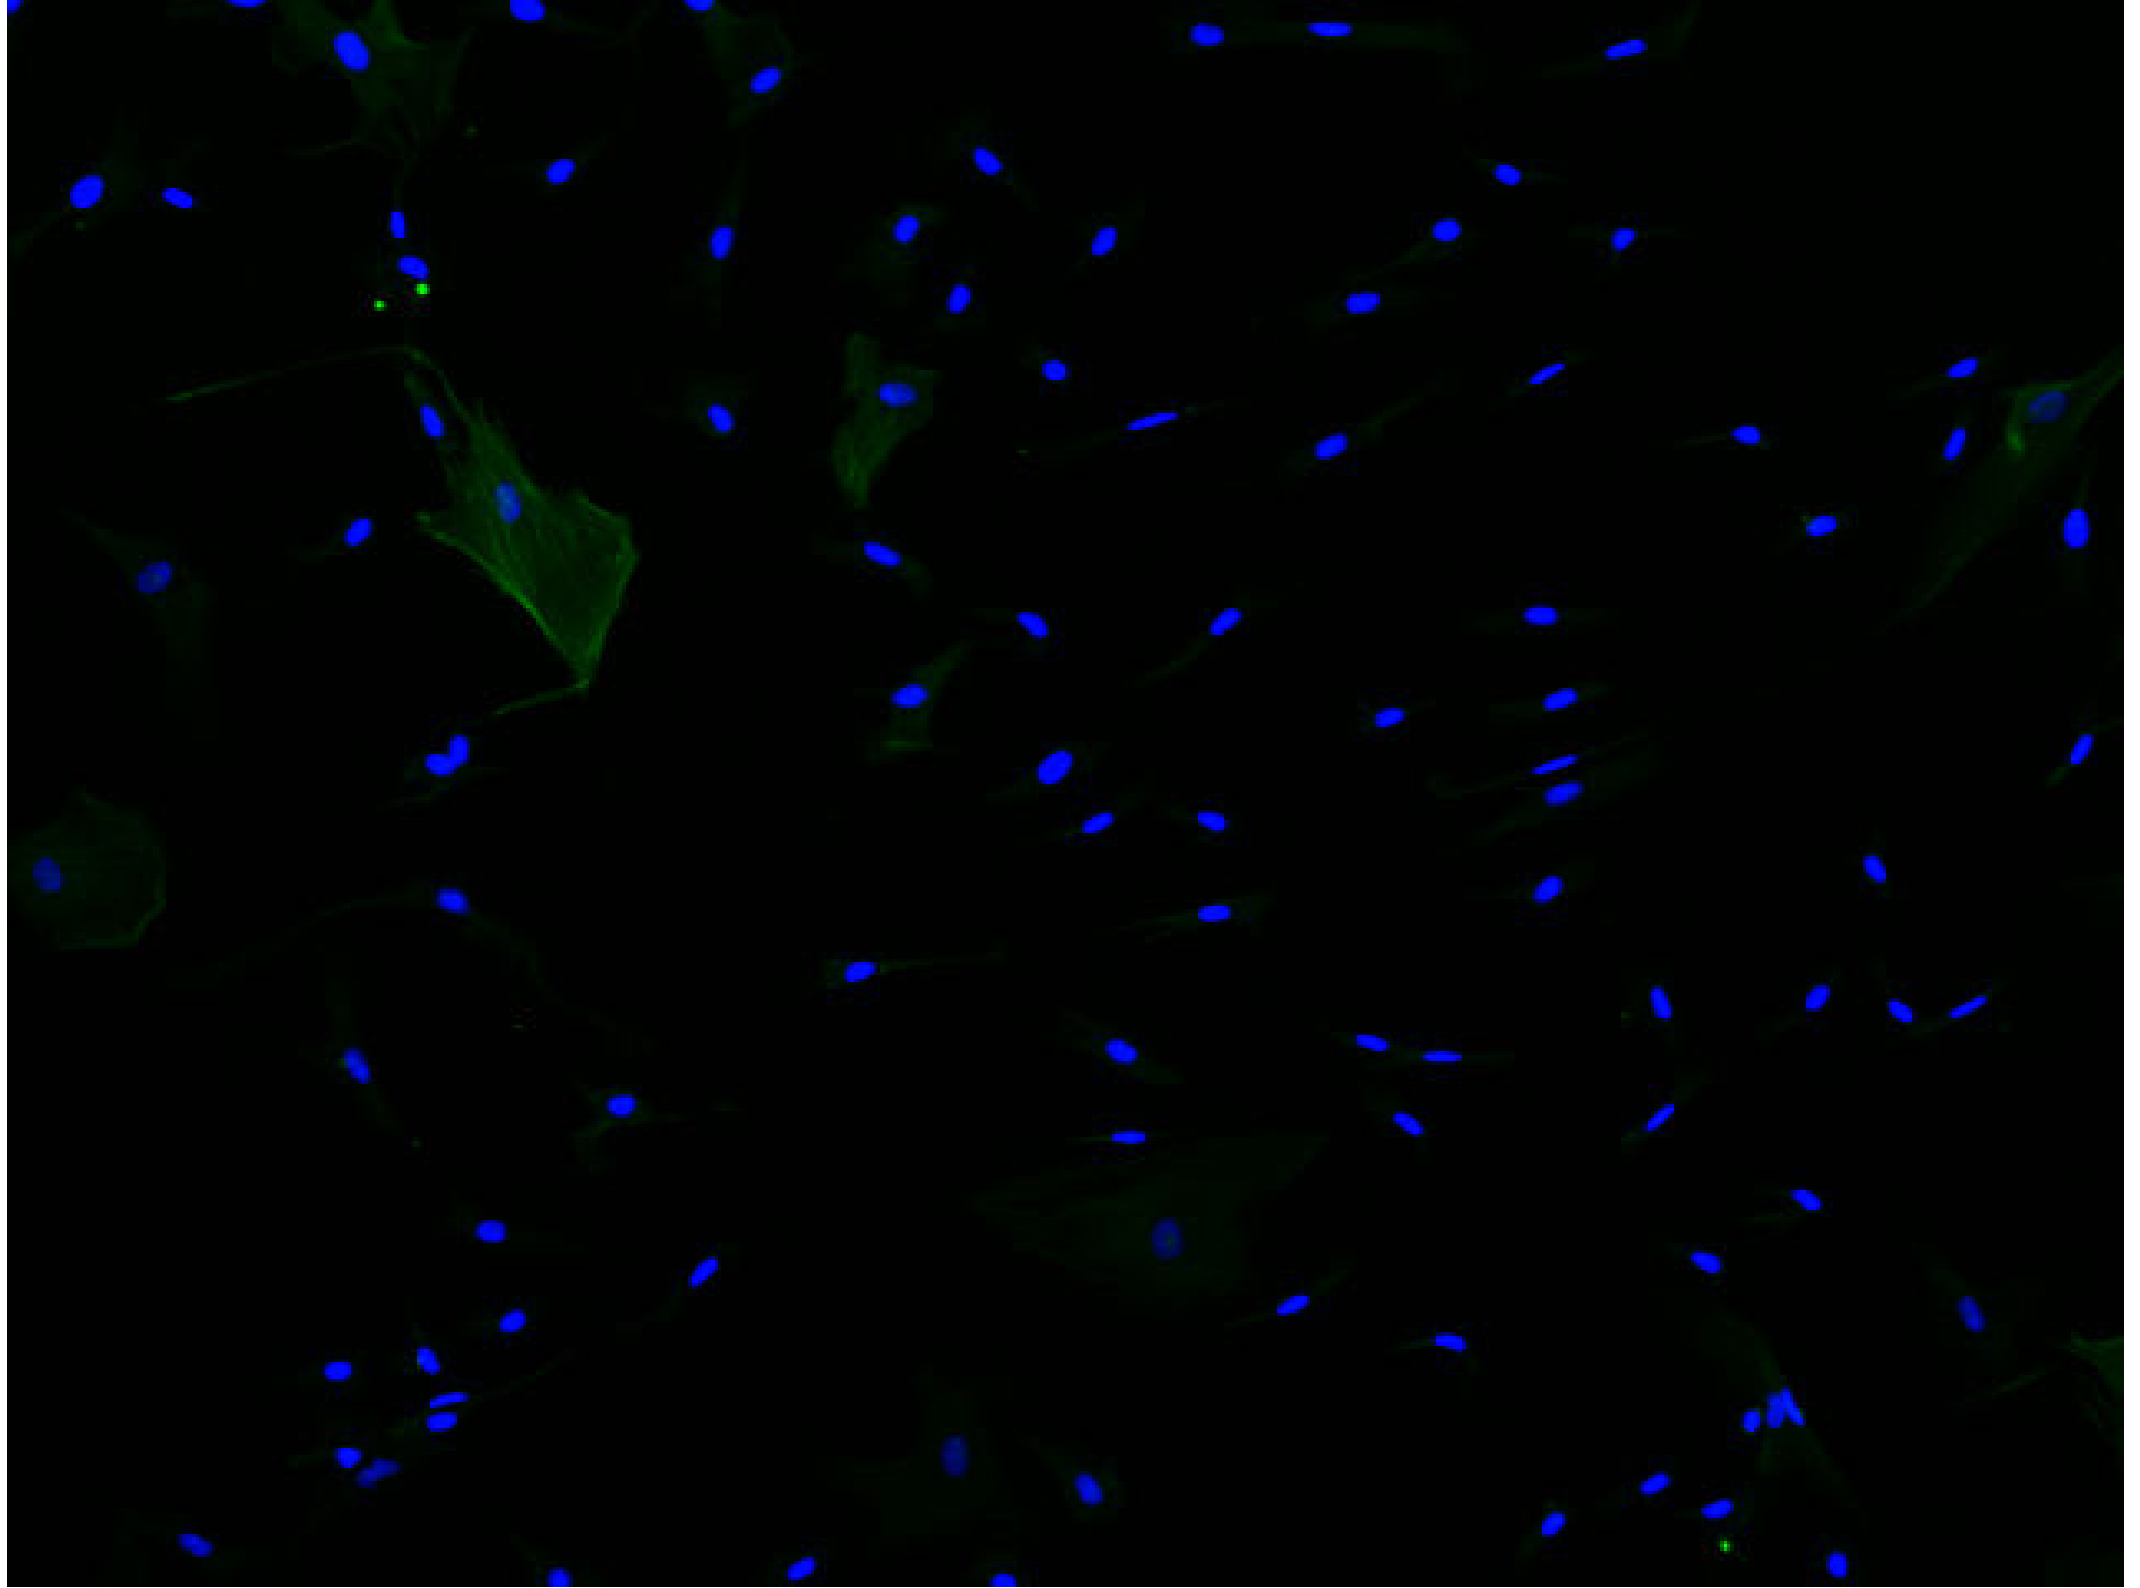



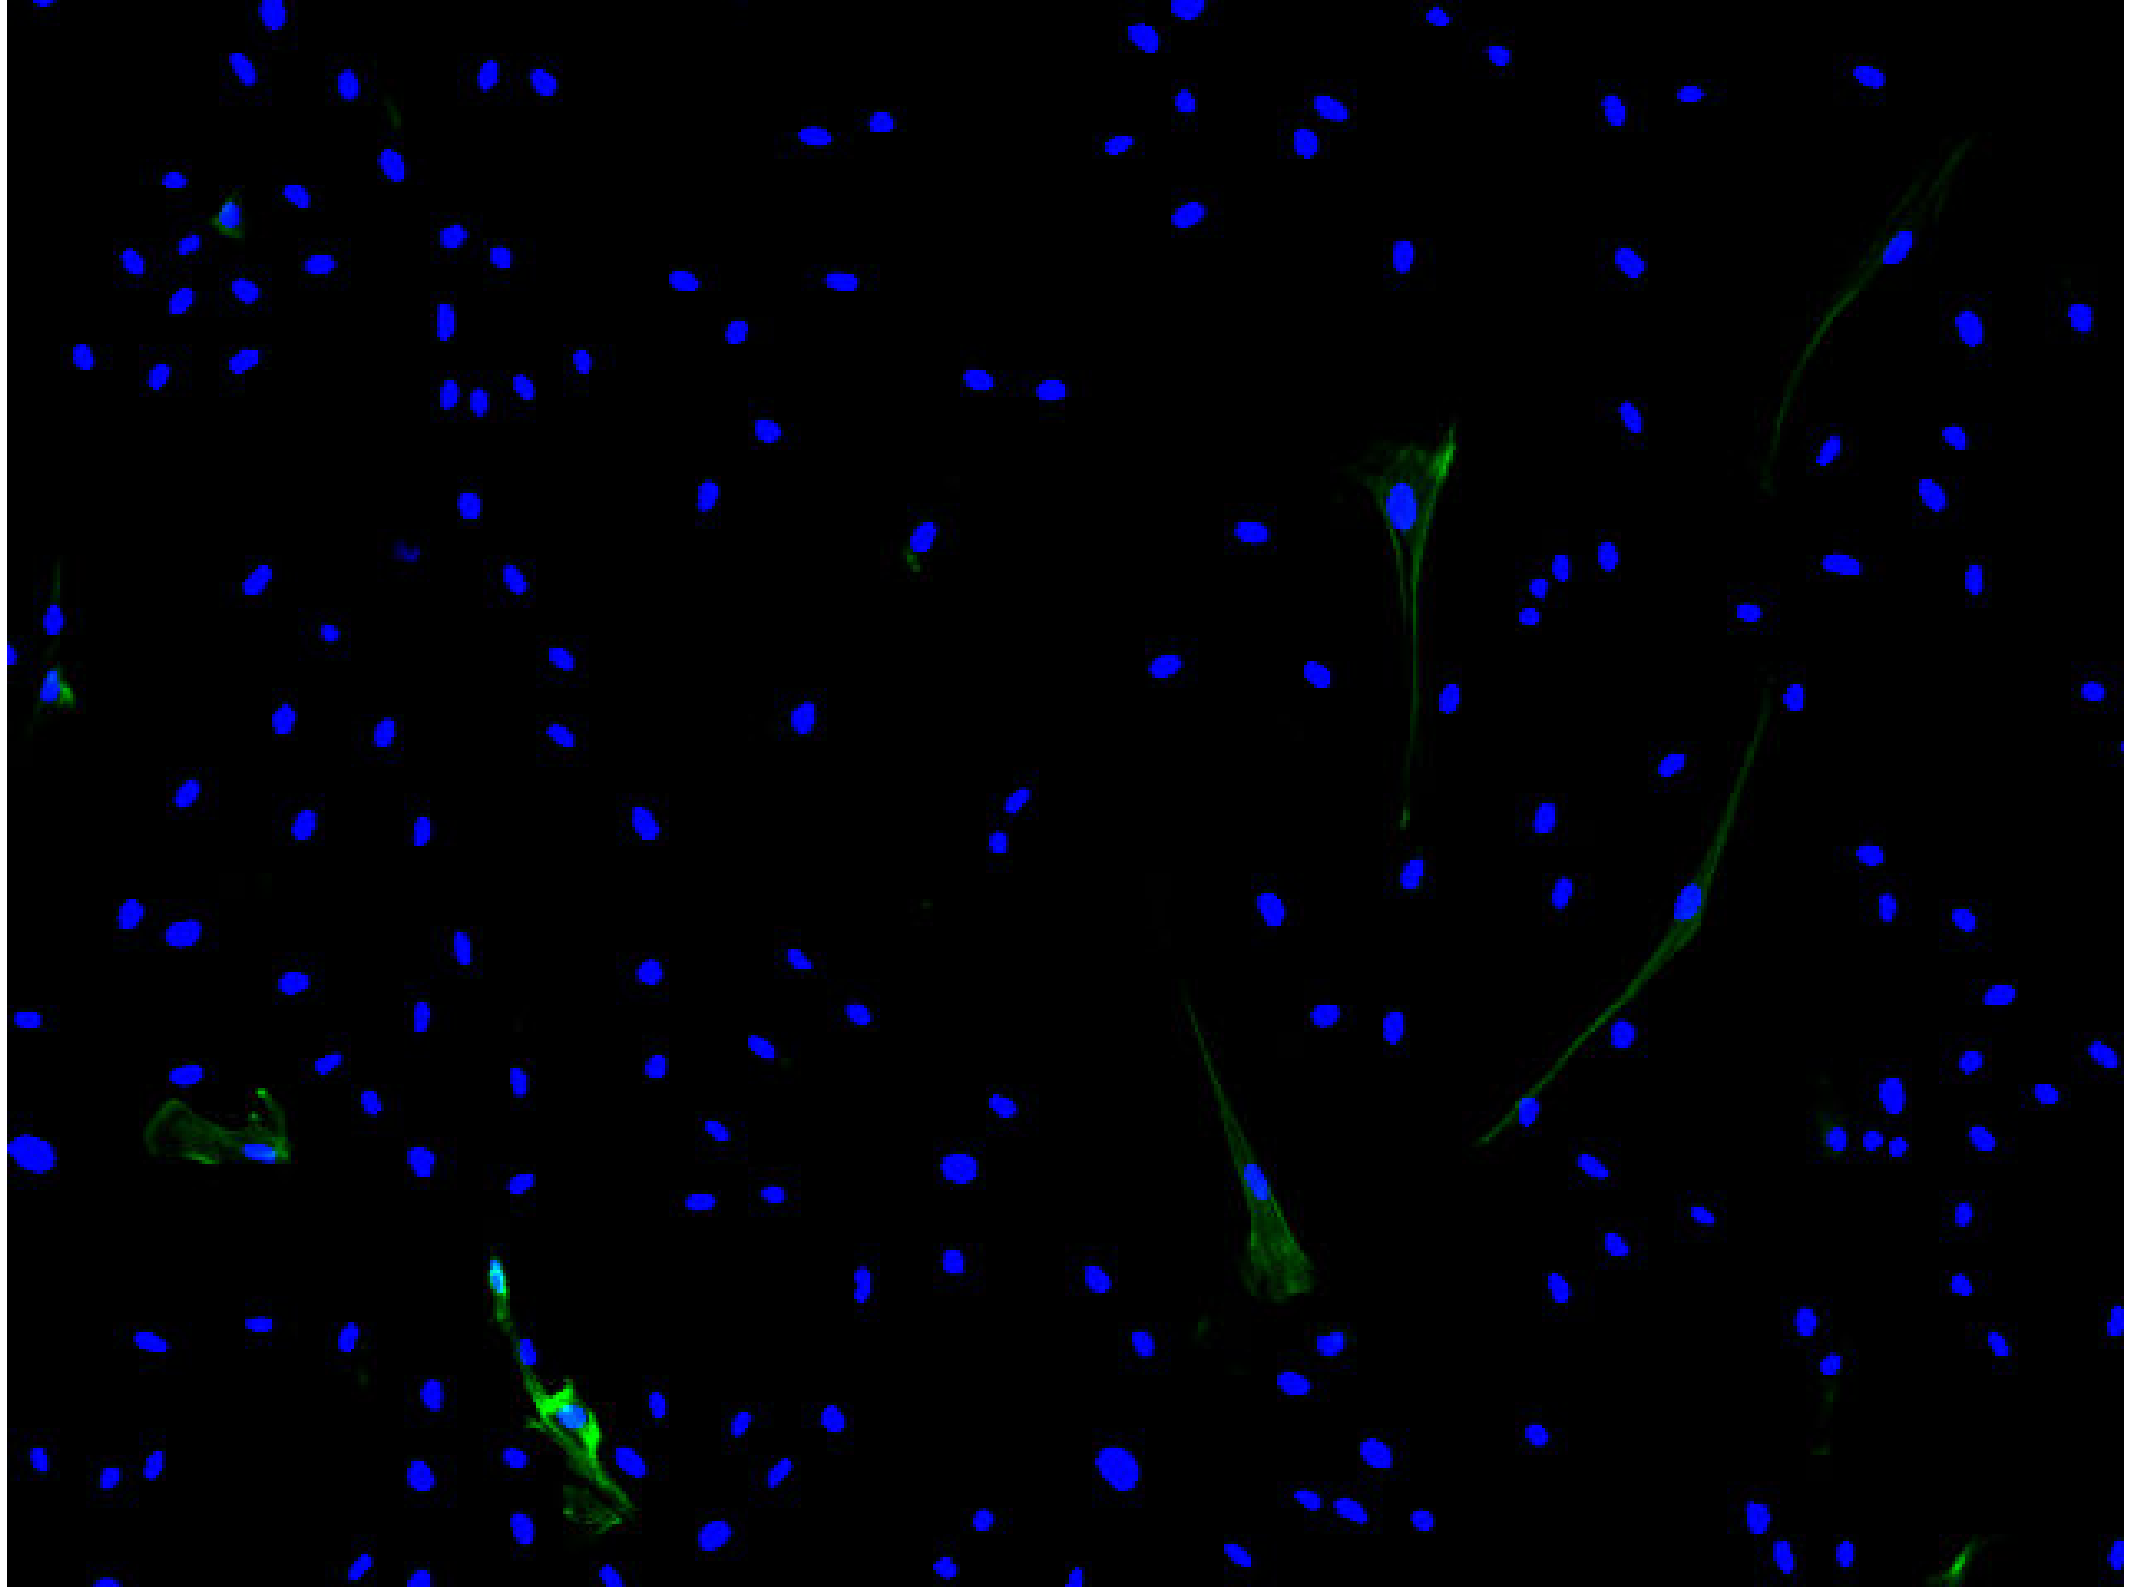

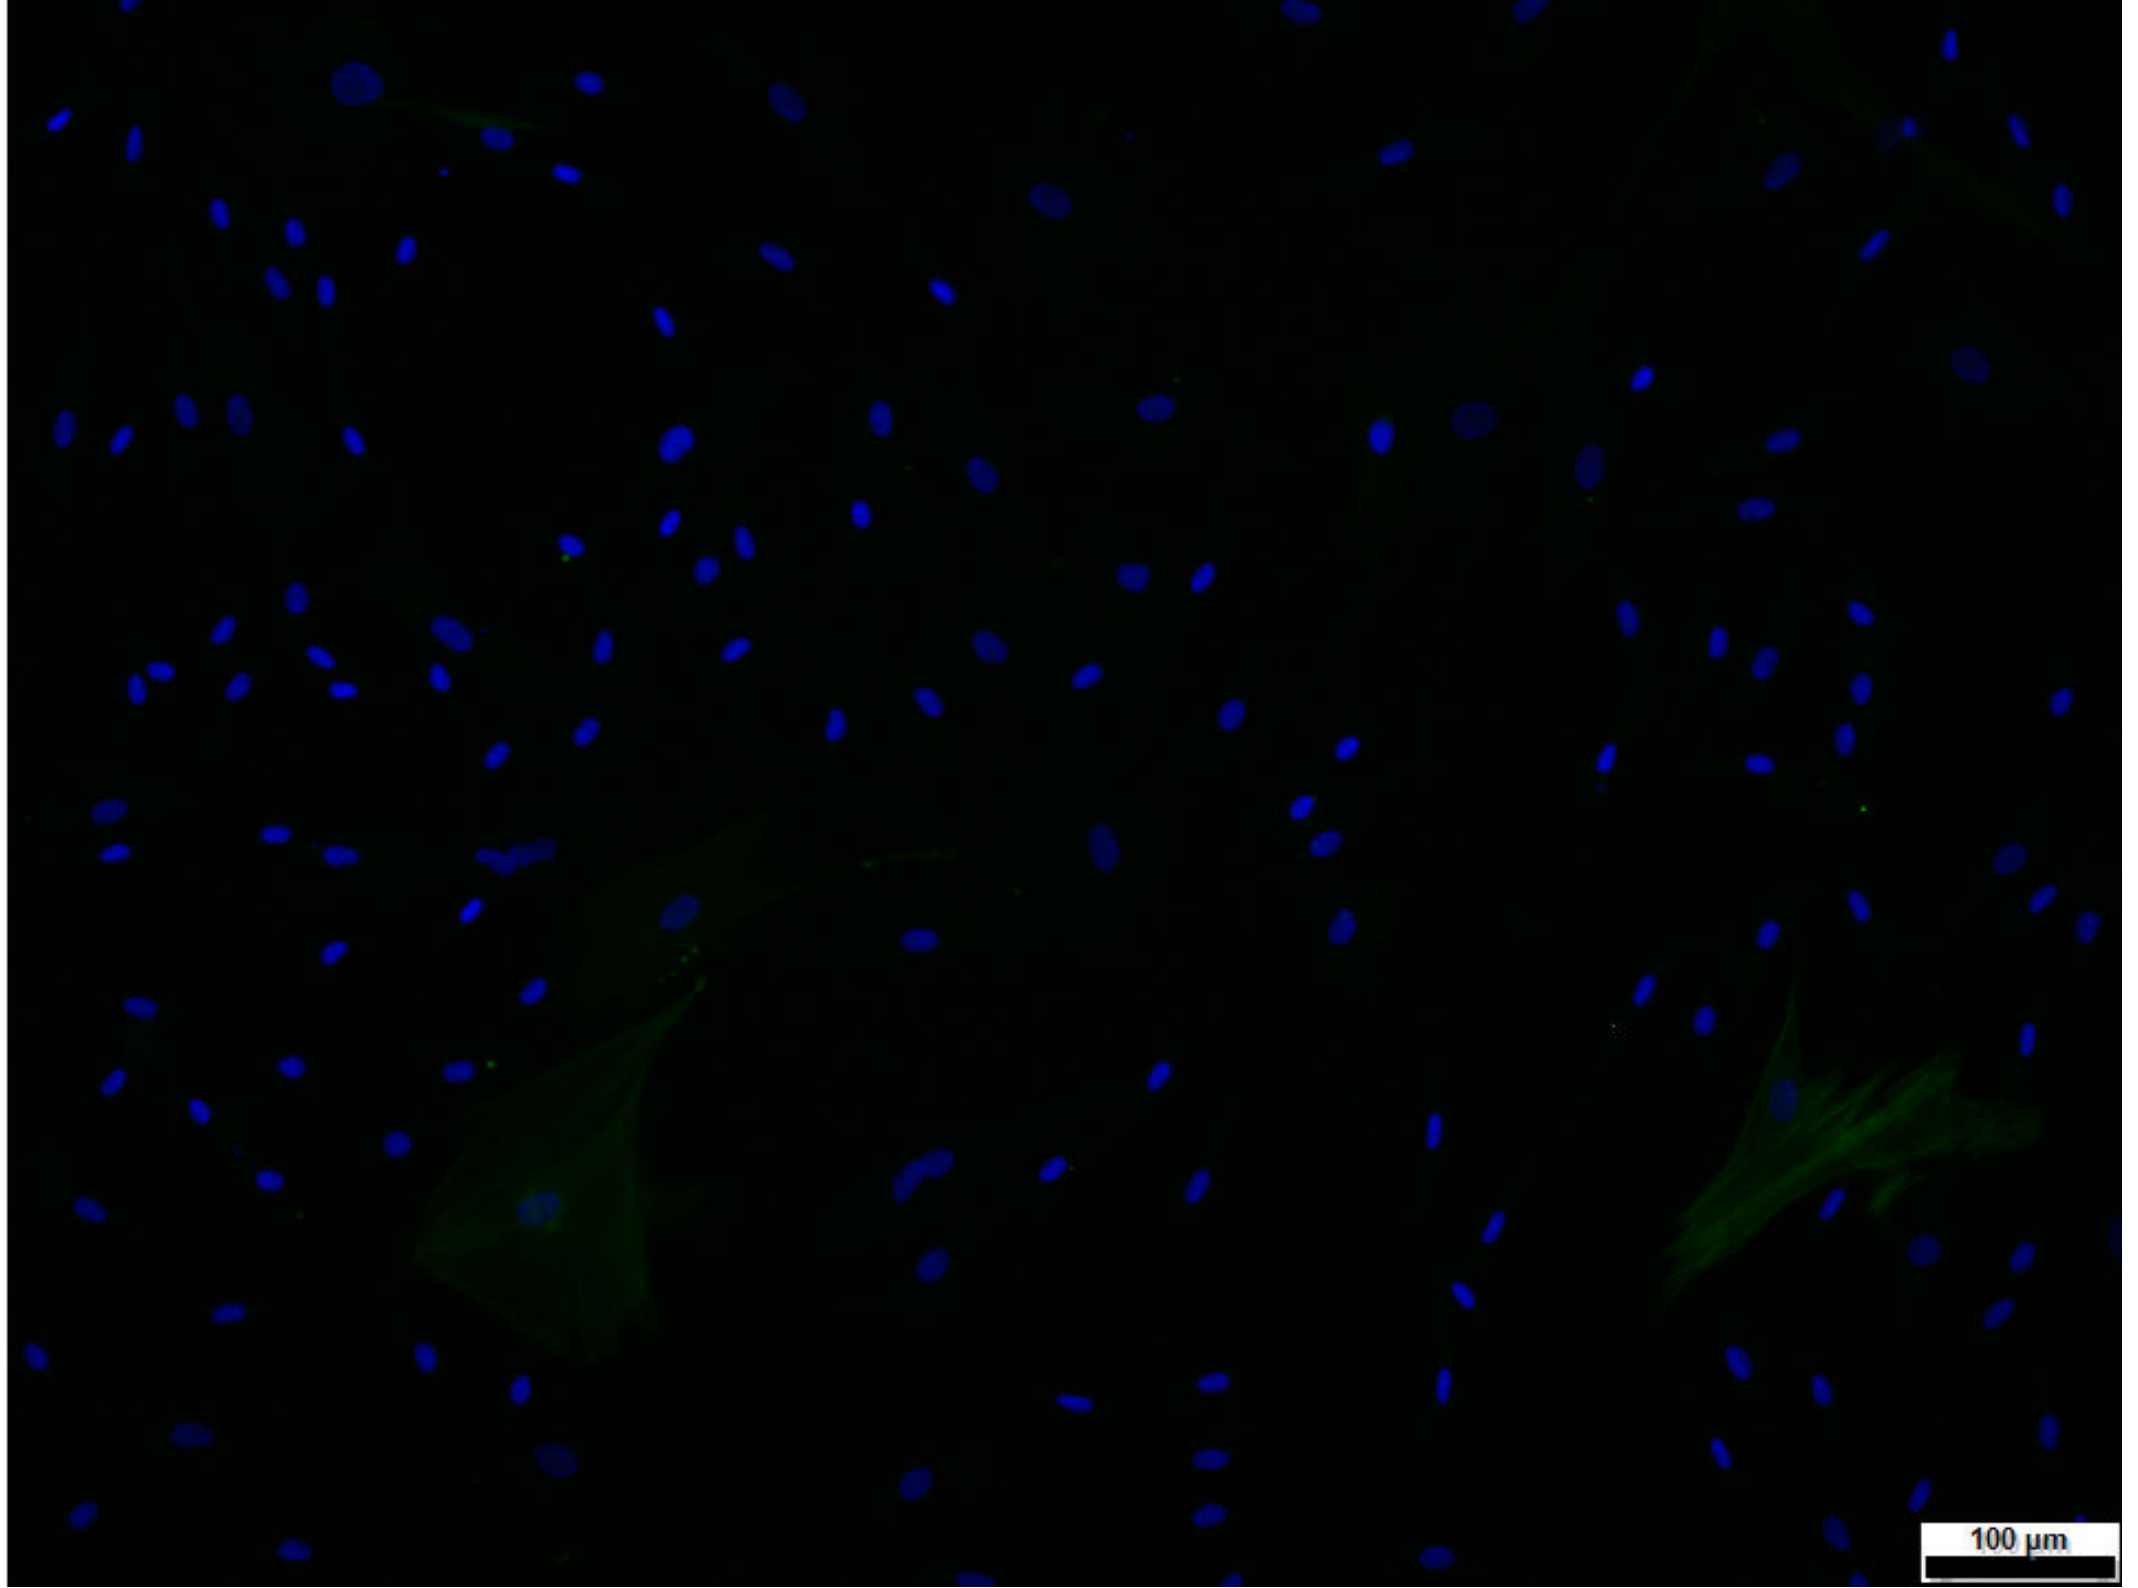

100 μm



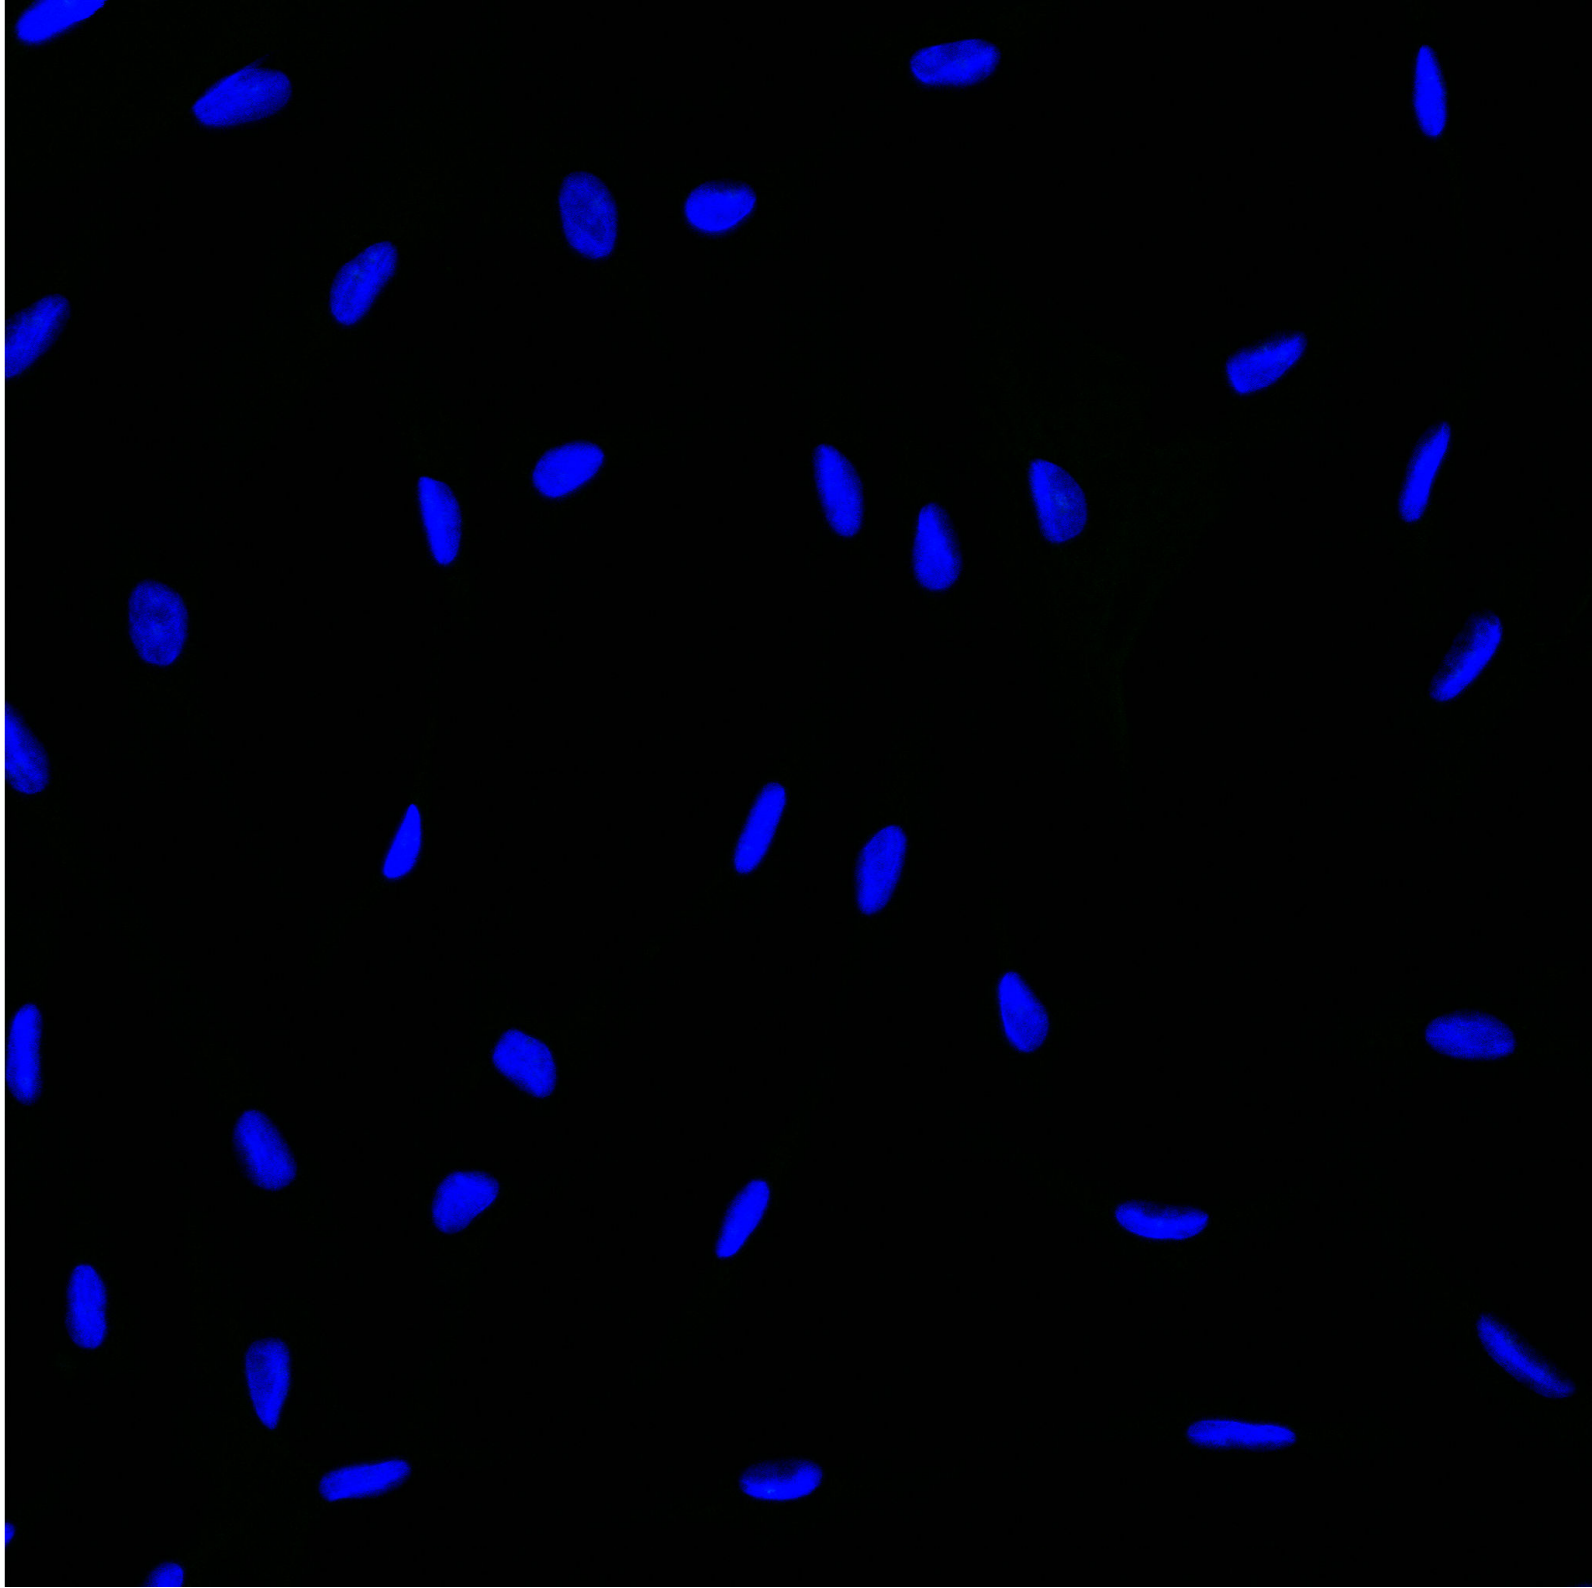

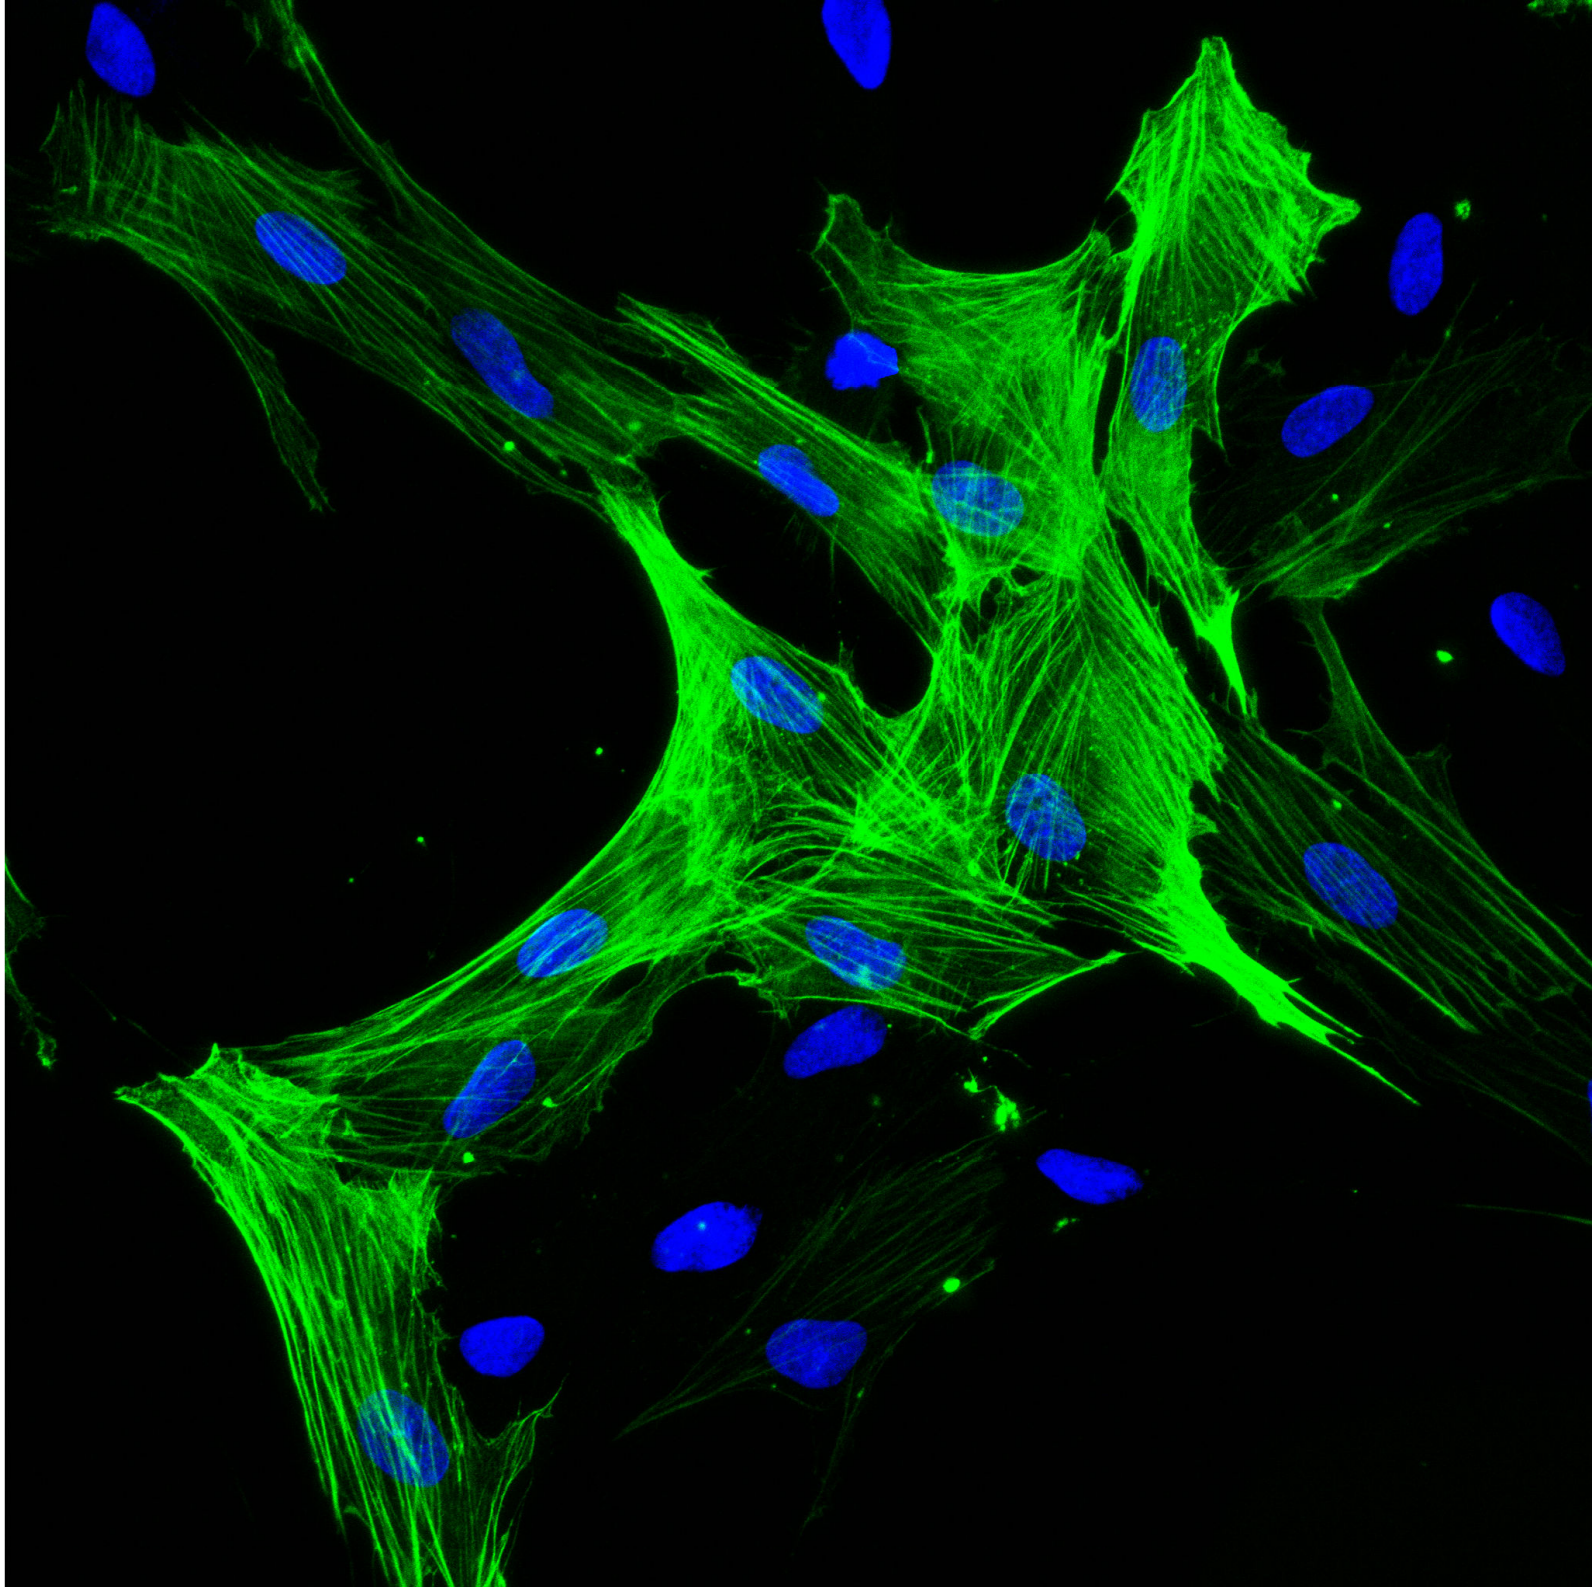



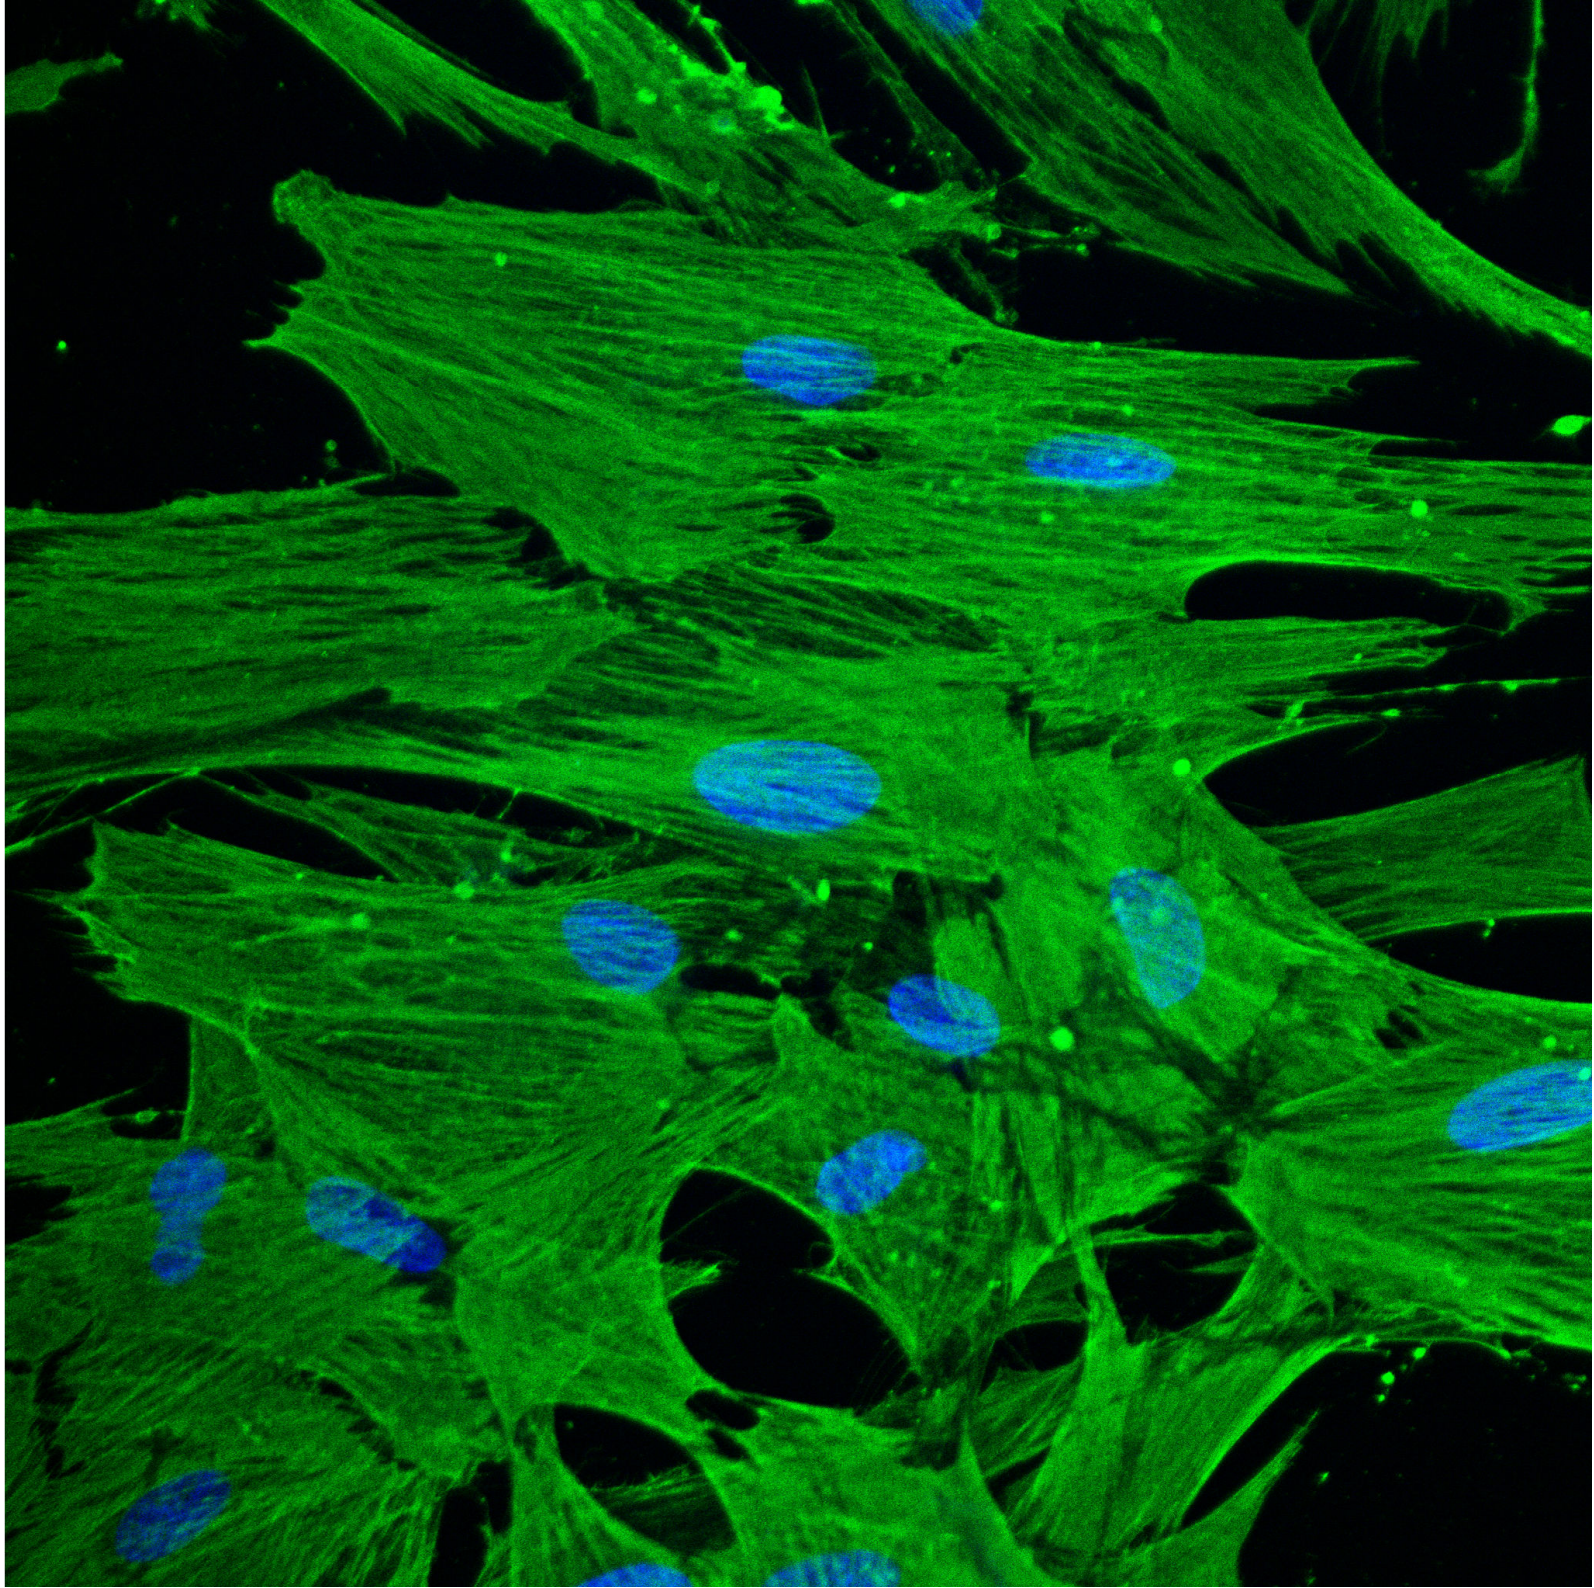



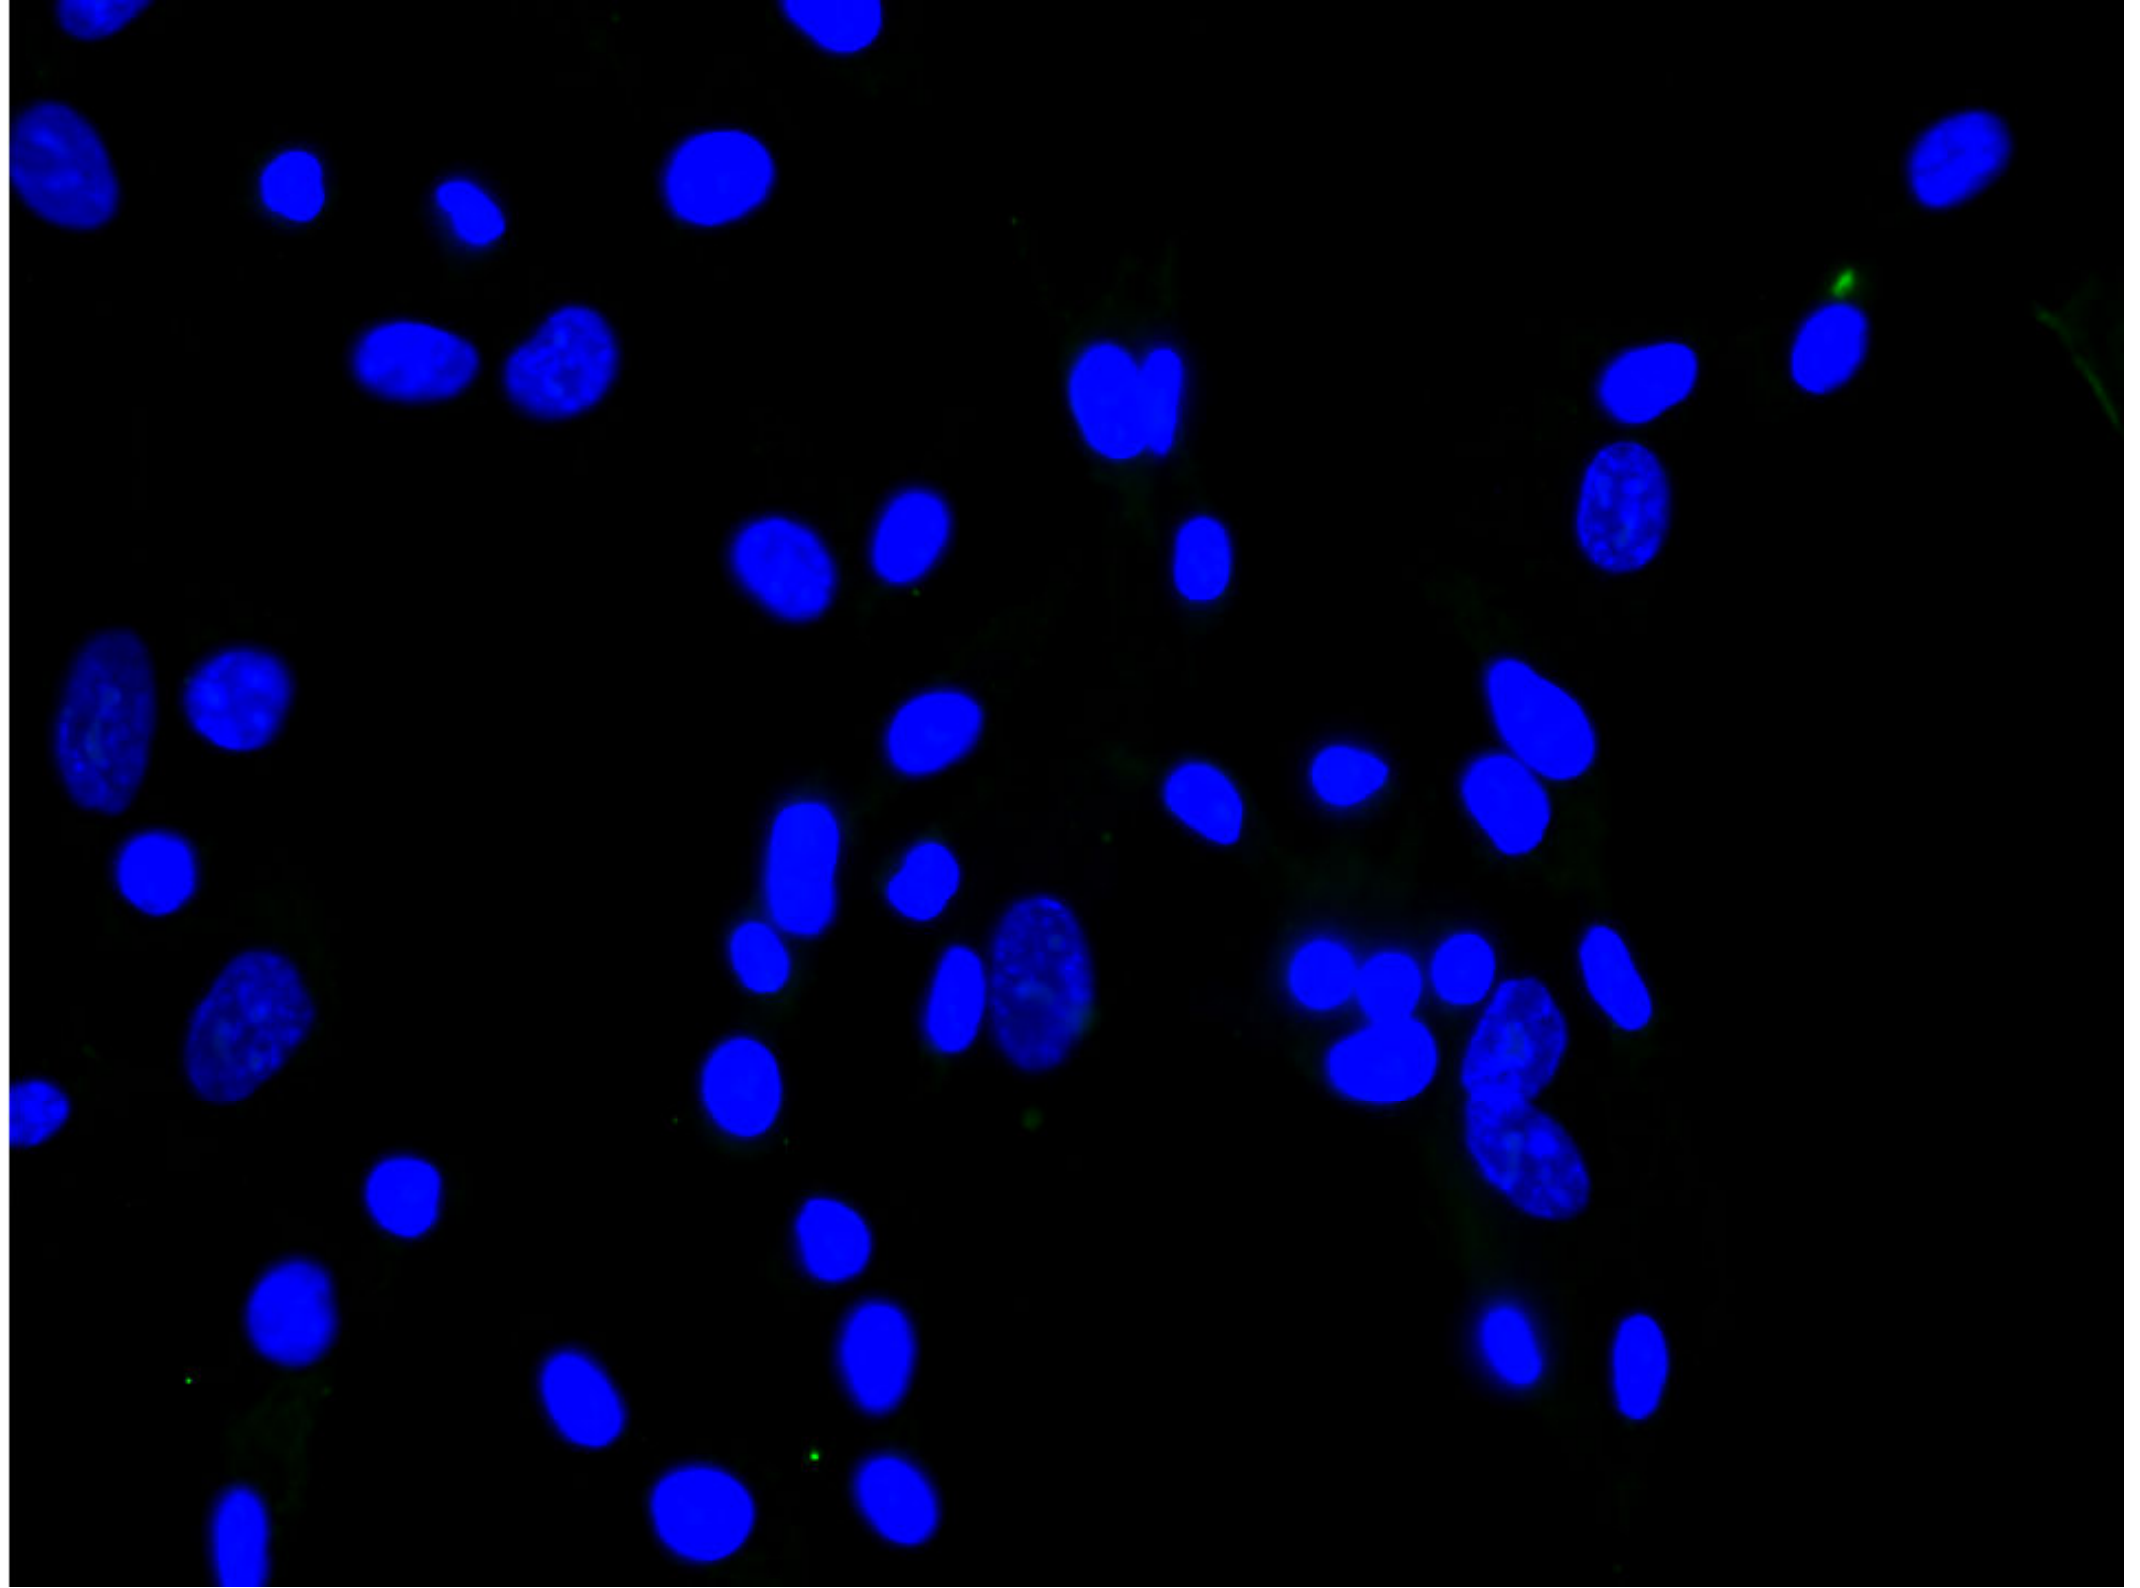



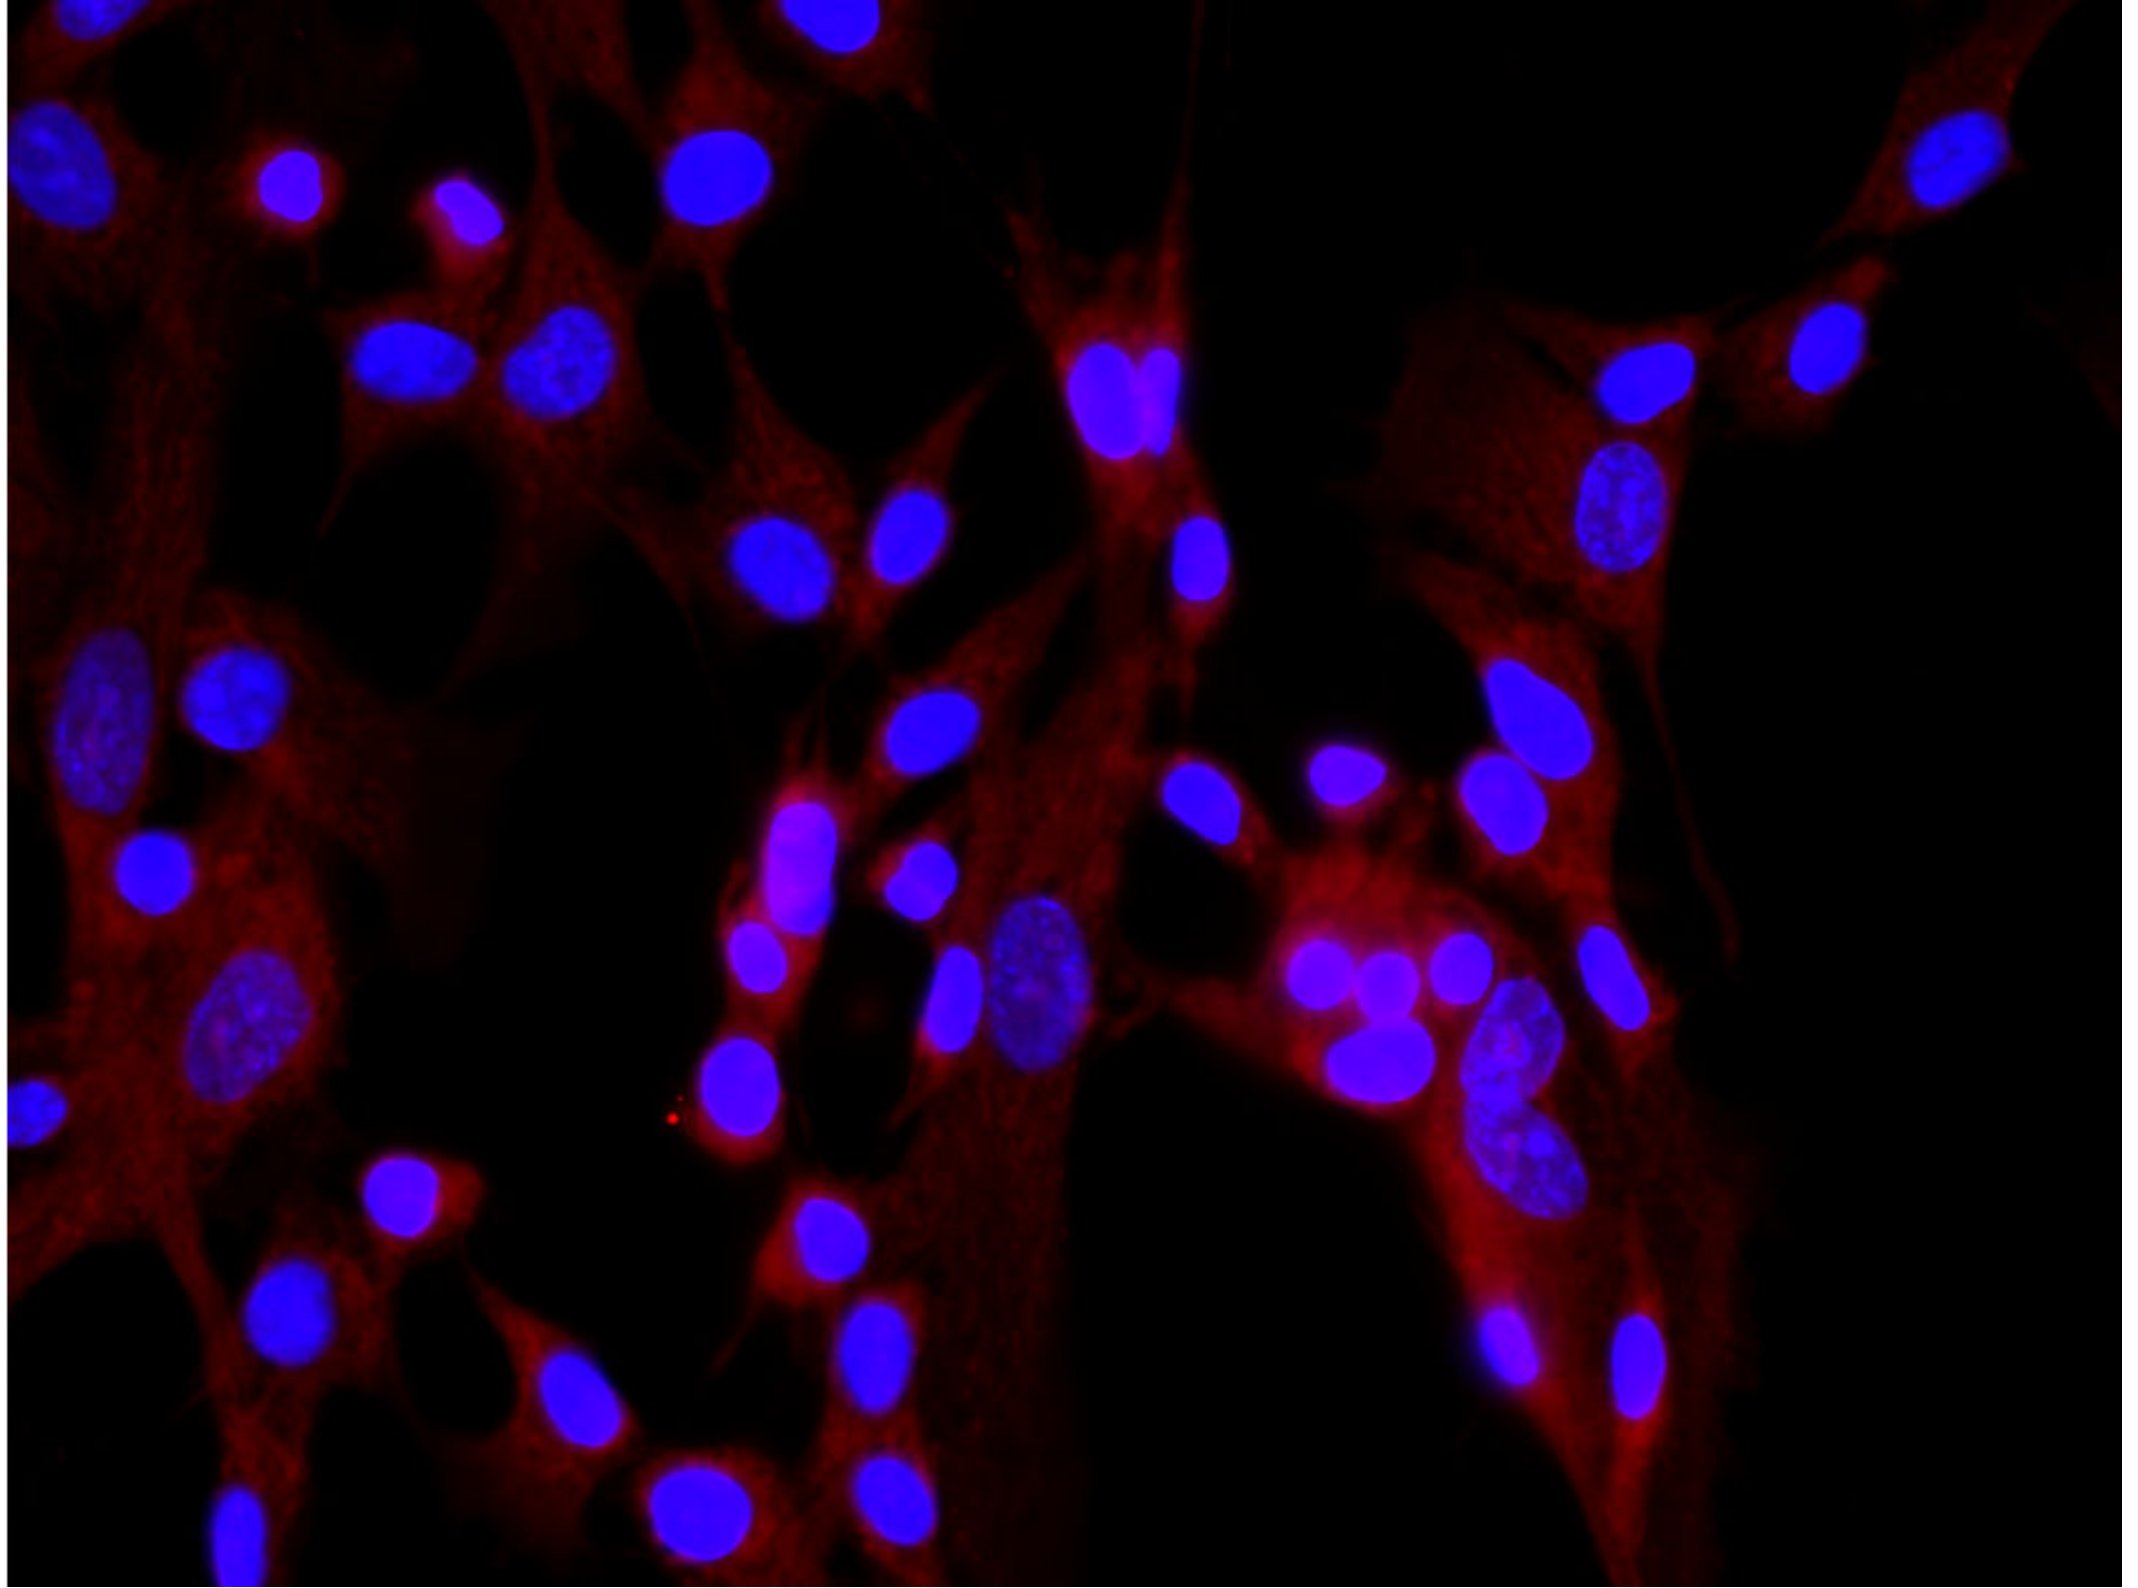

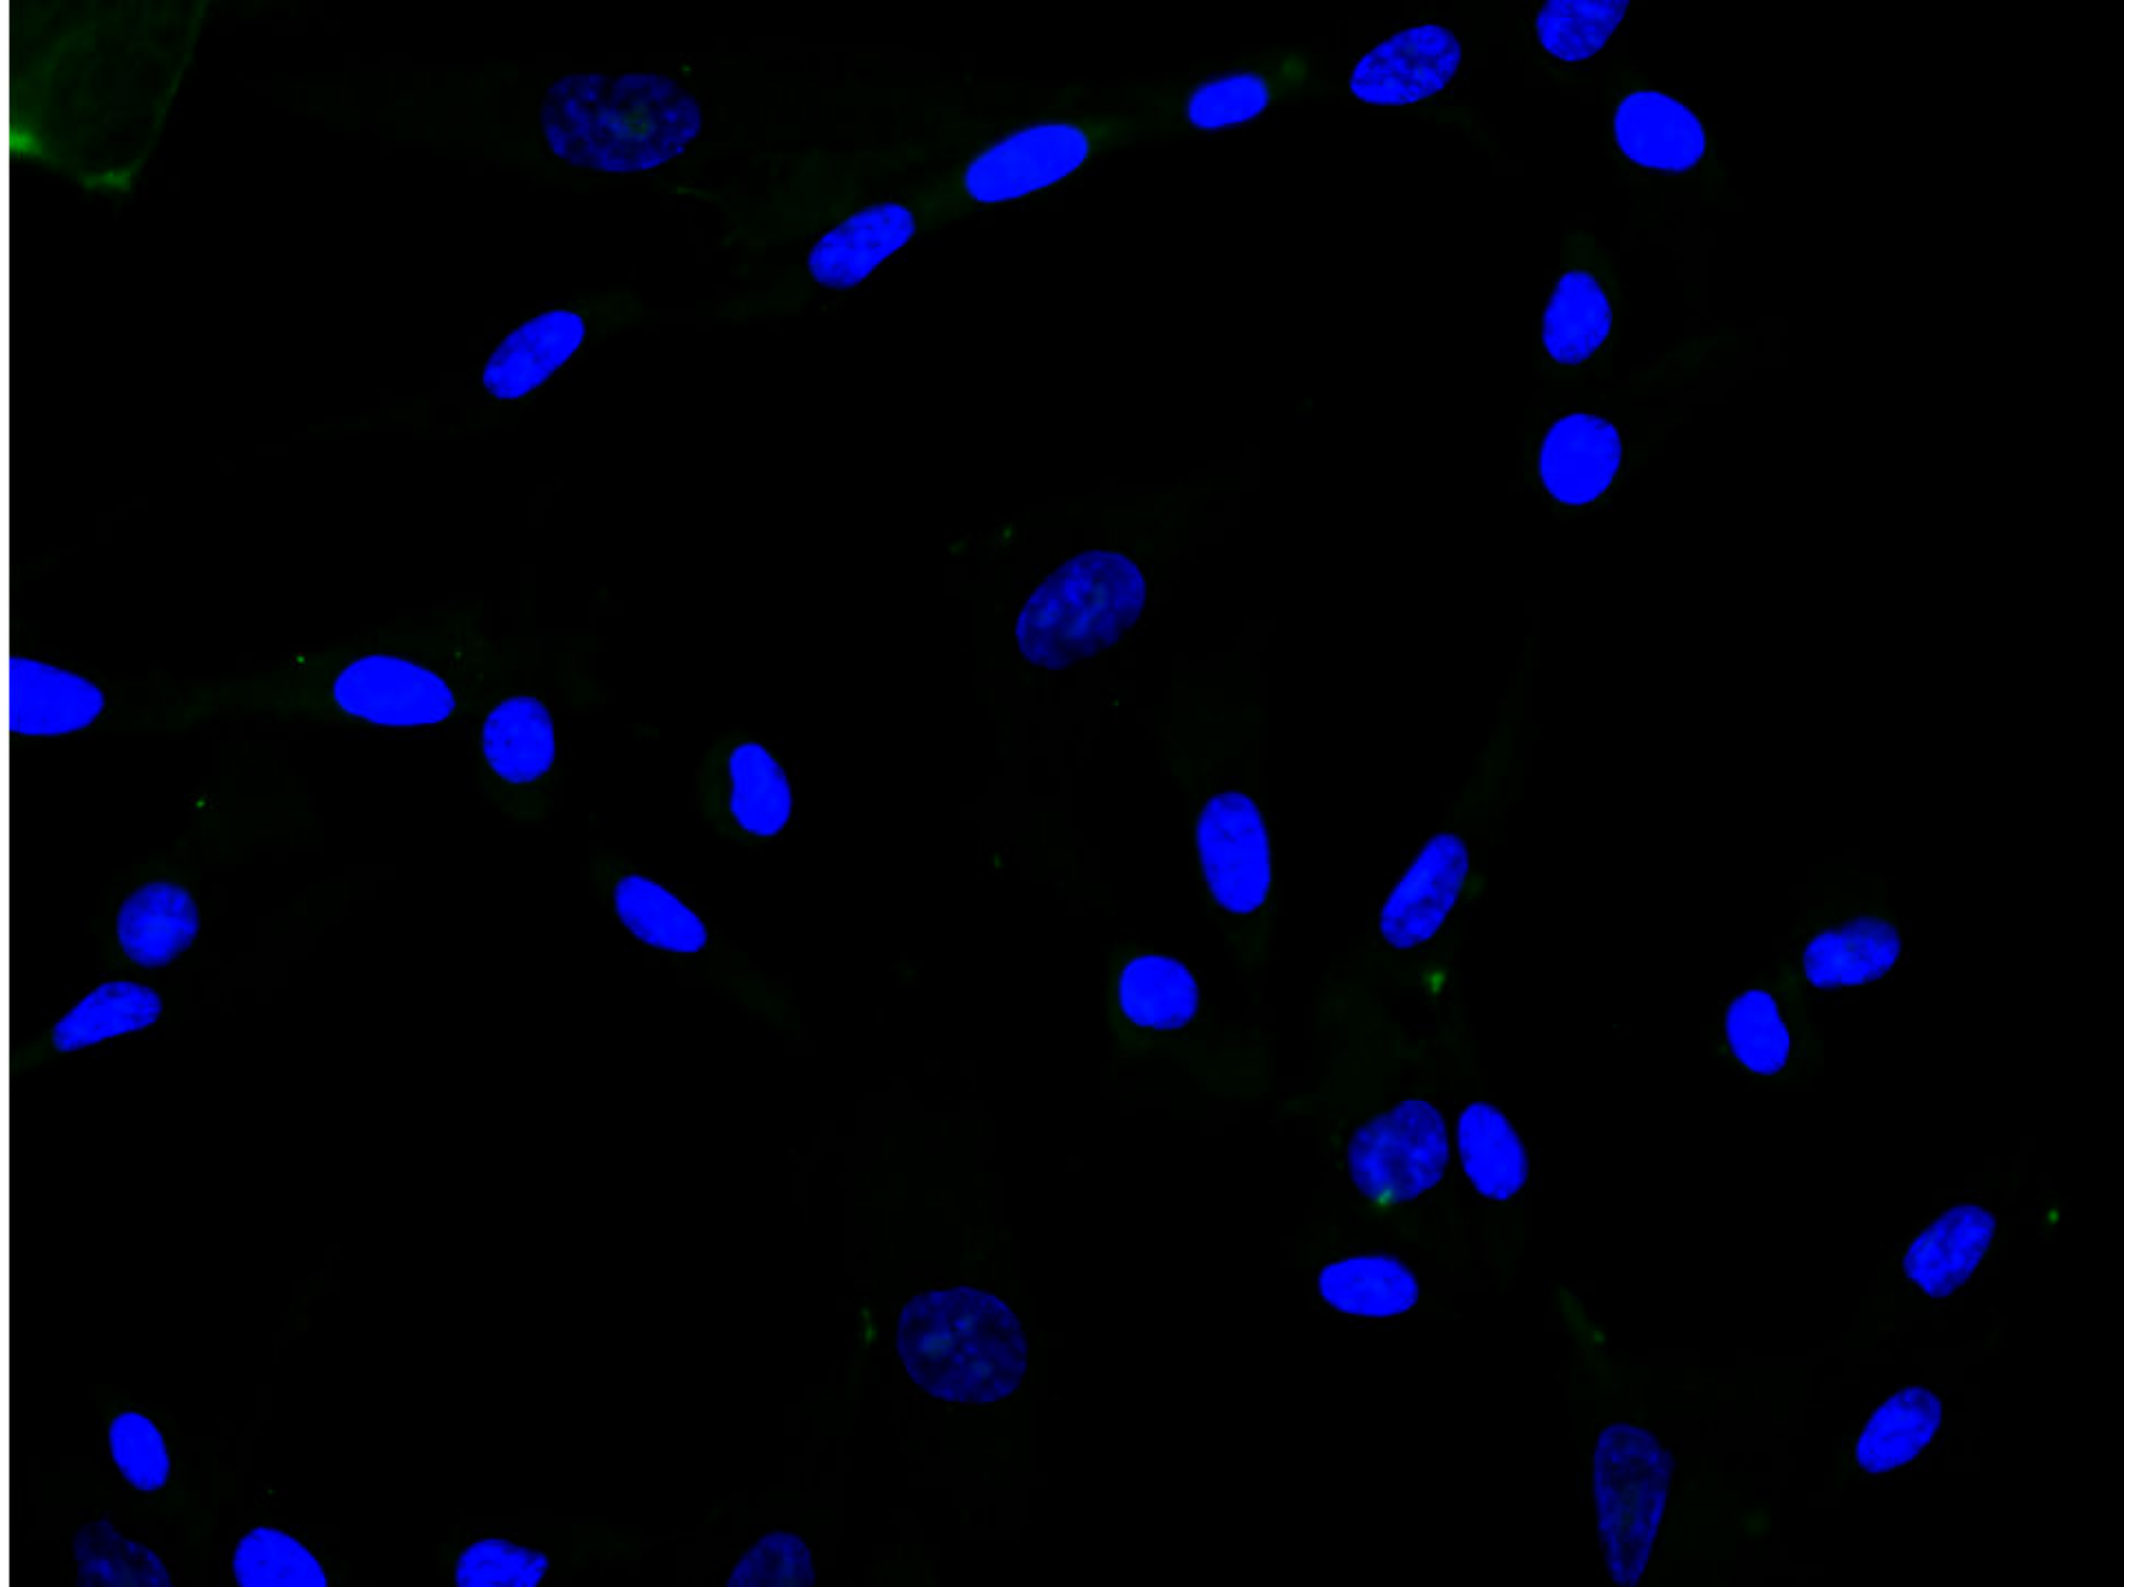



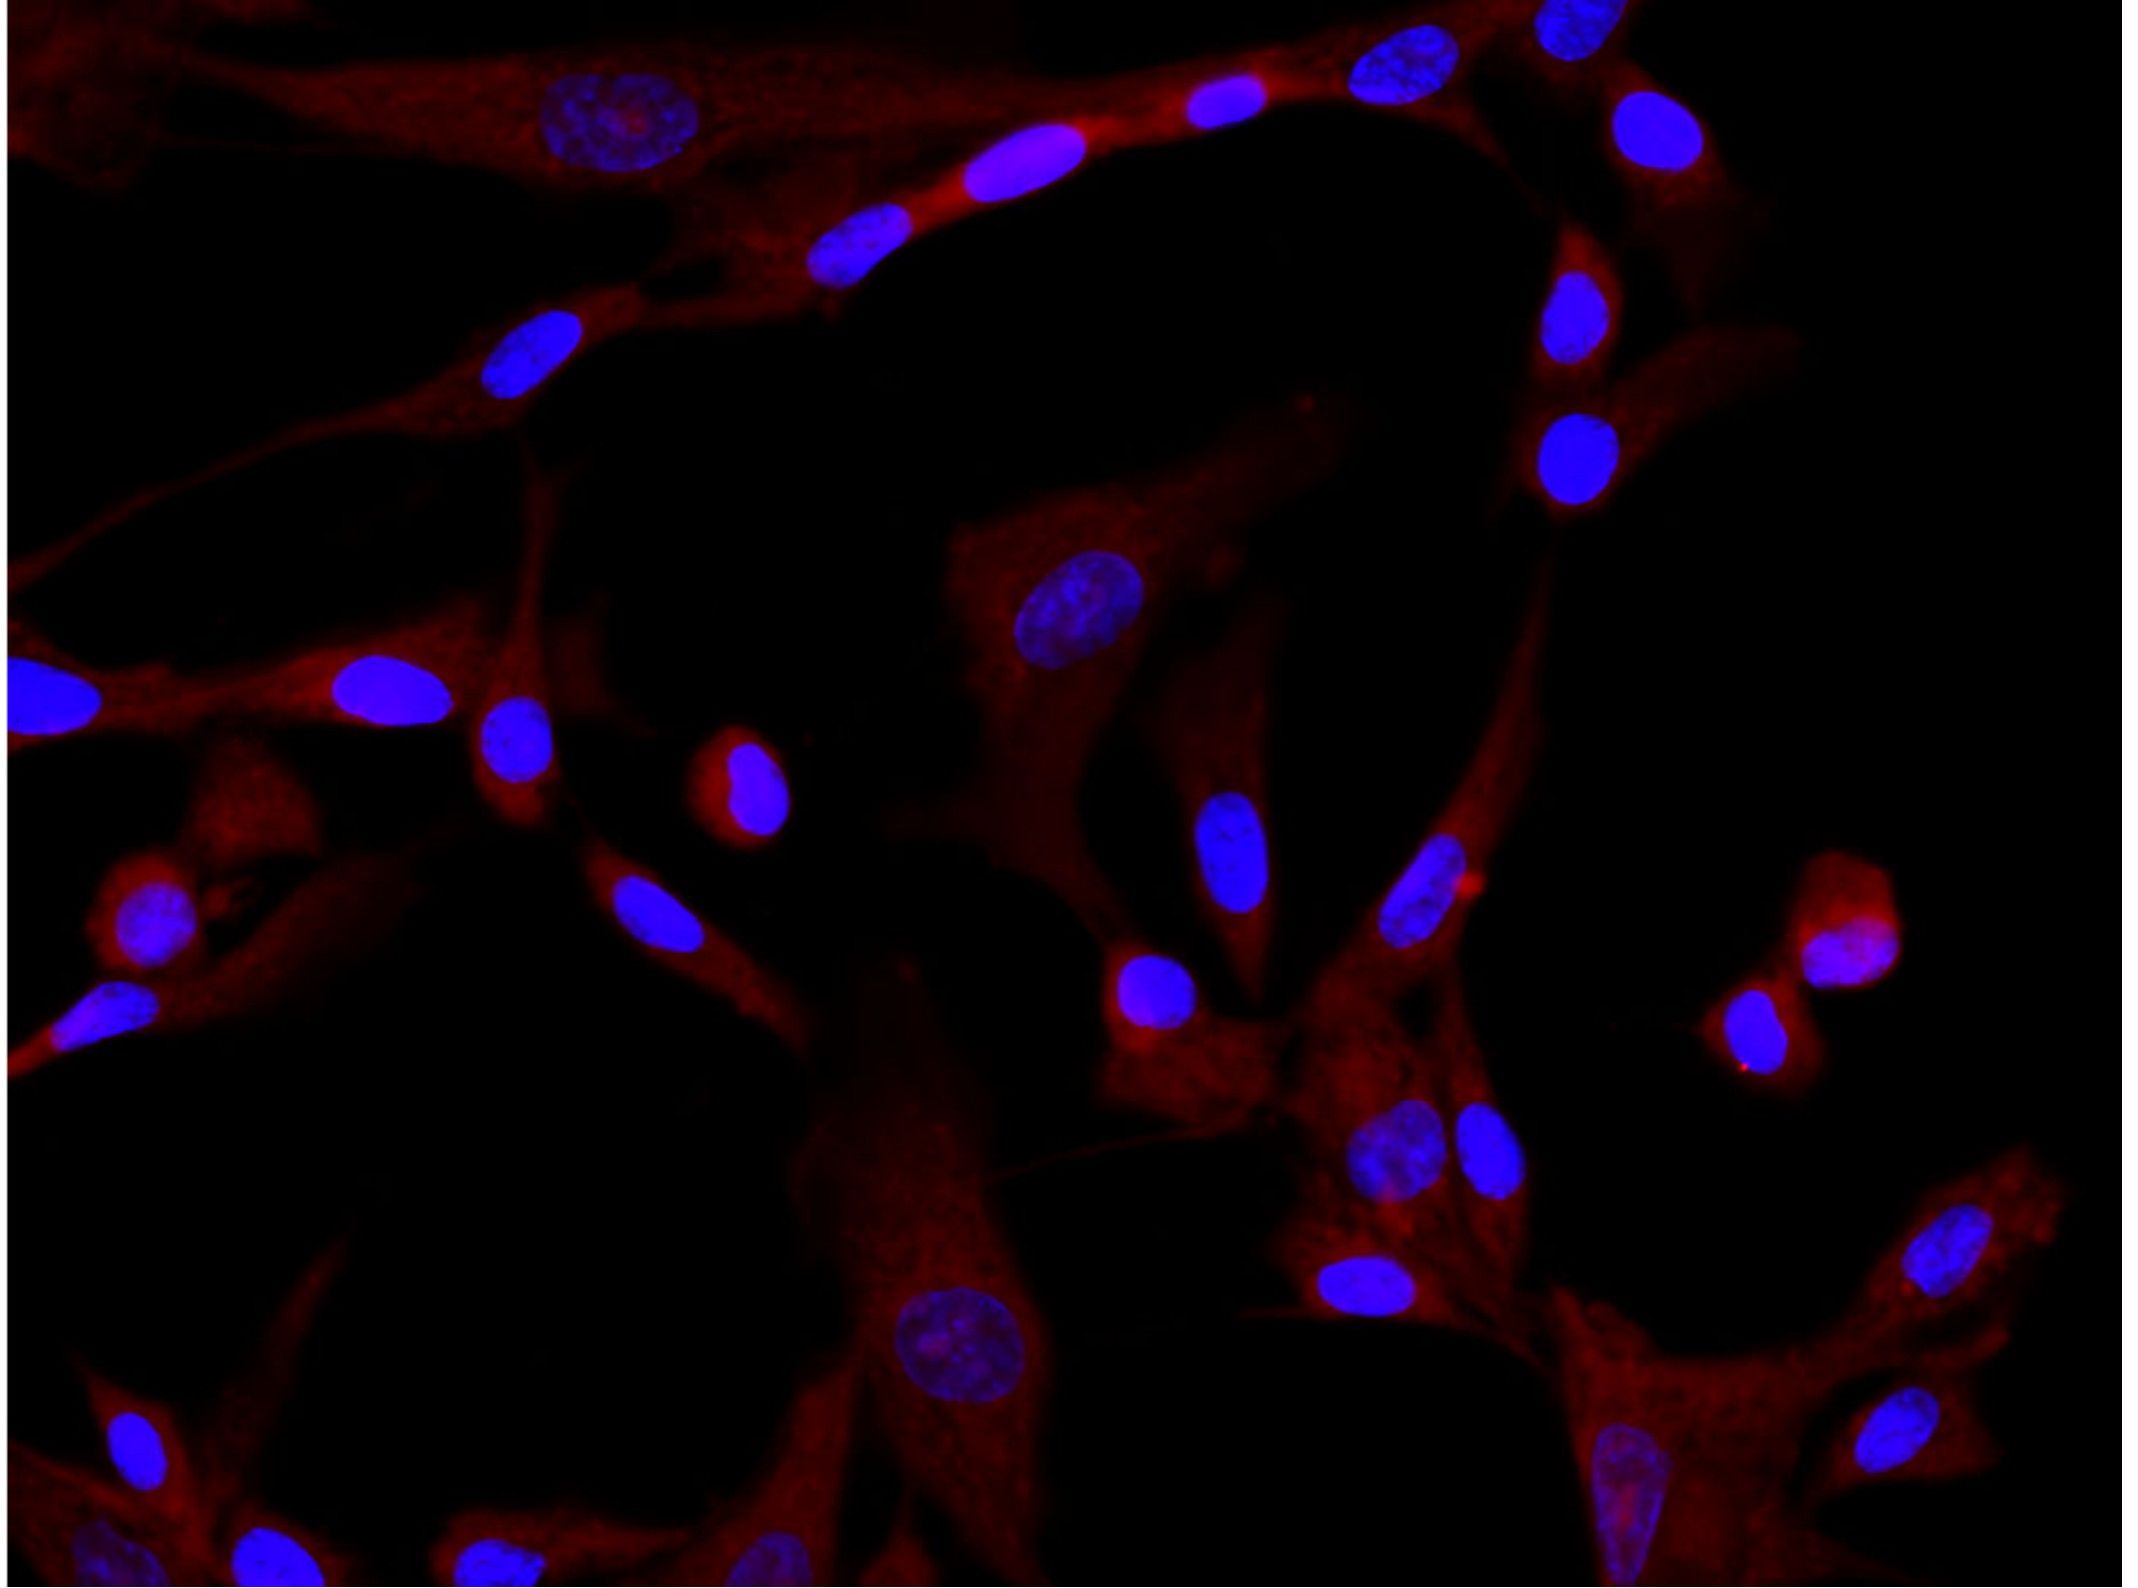

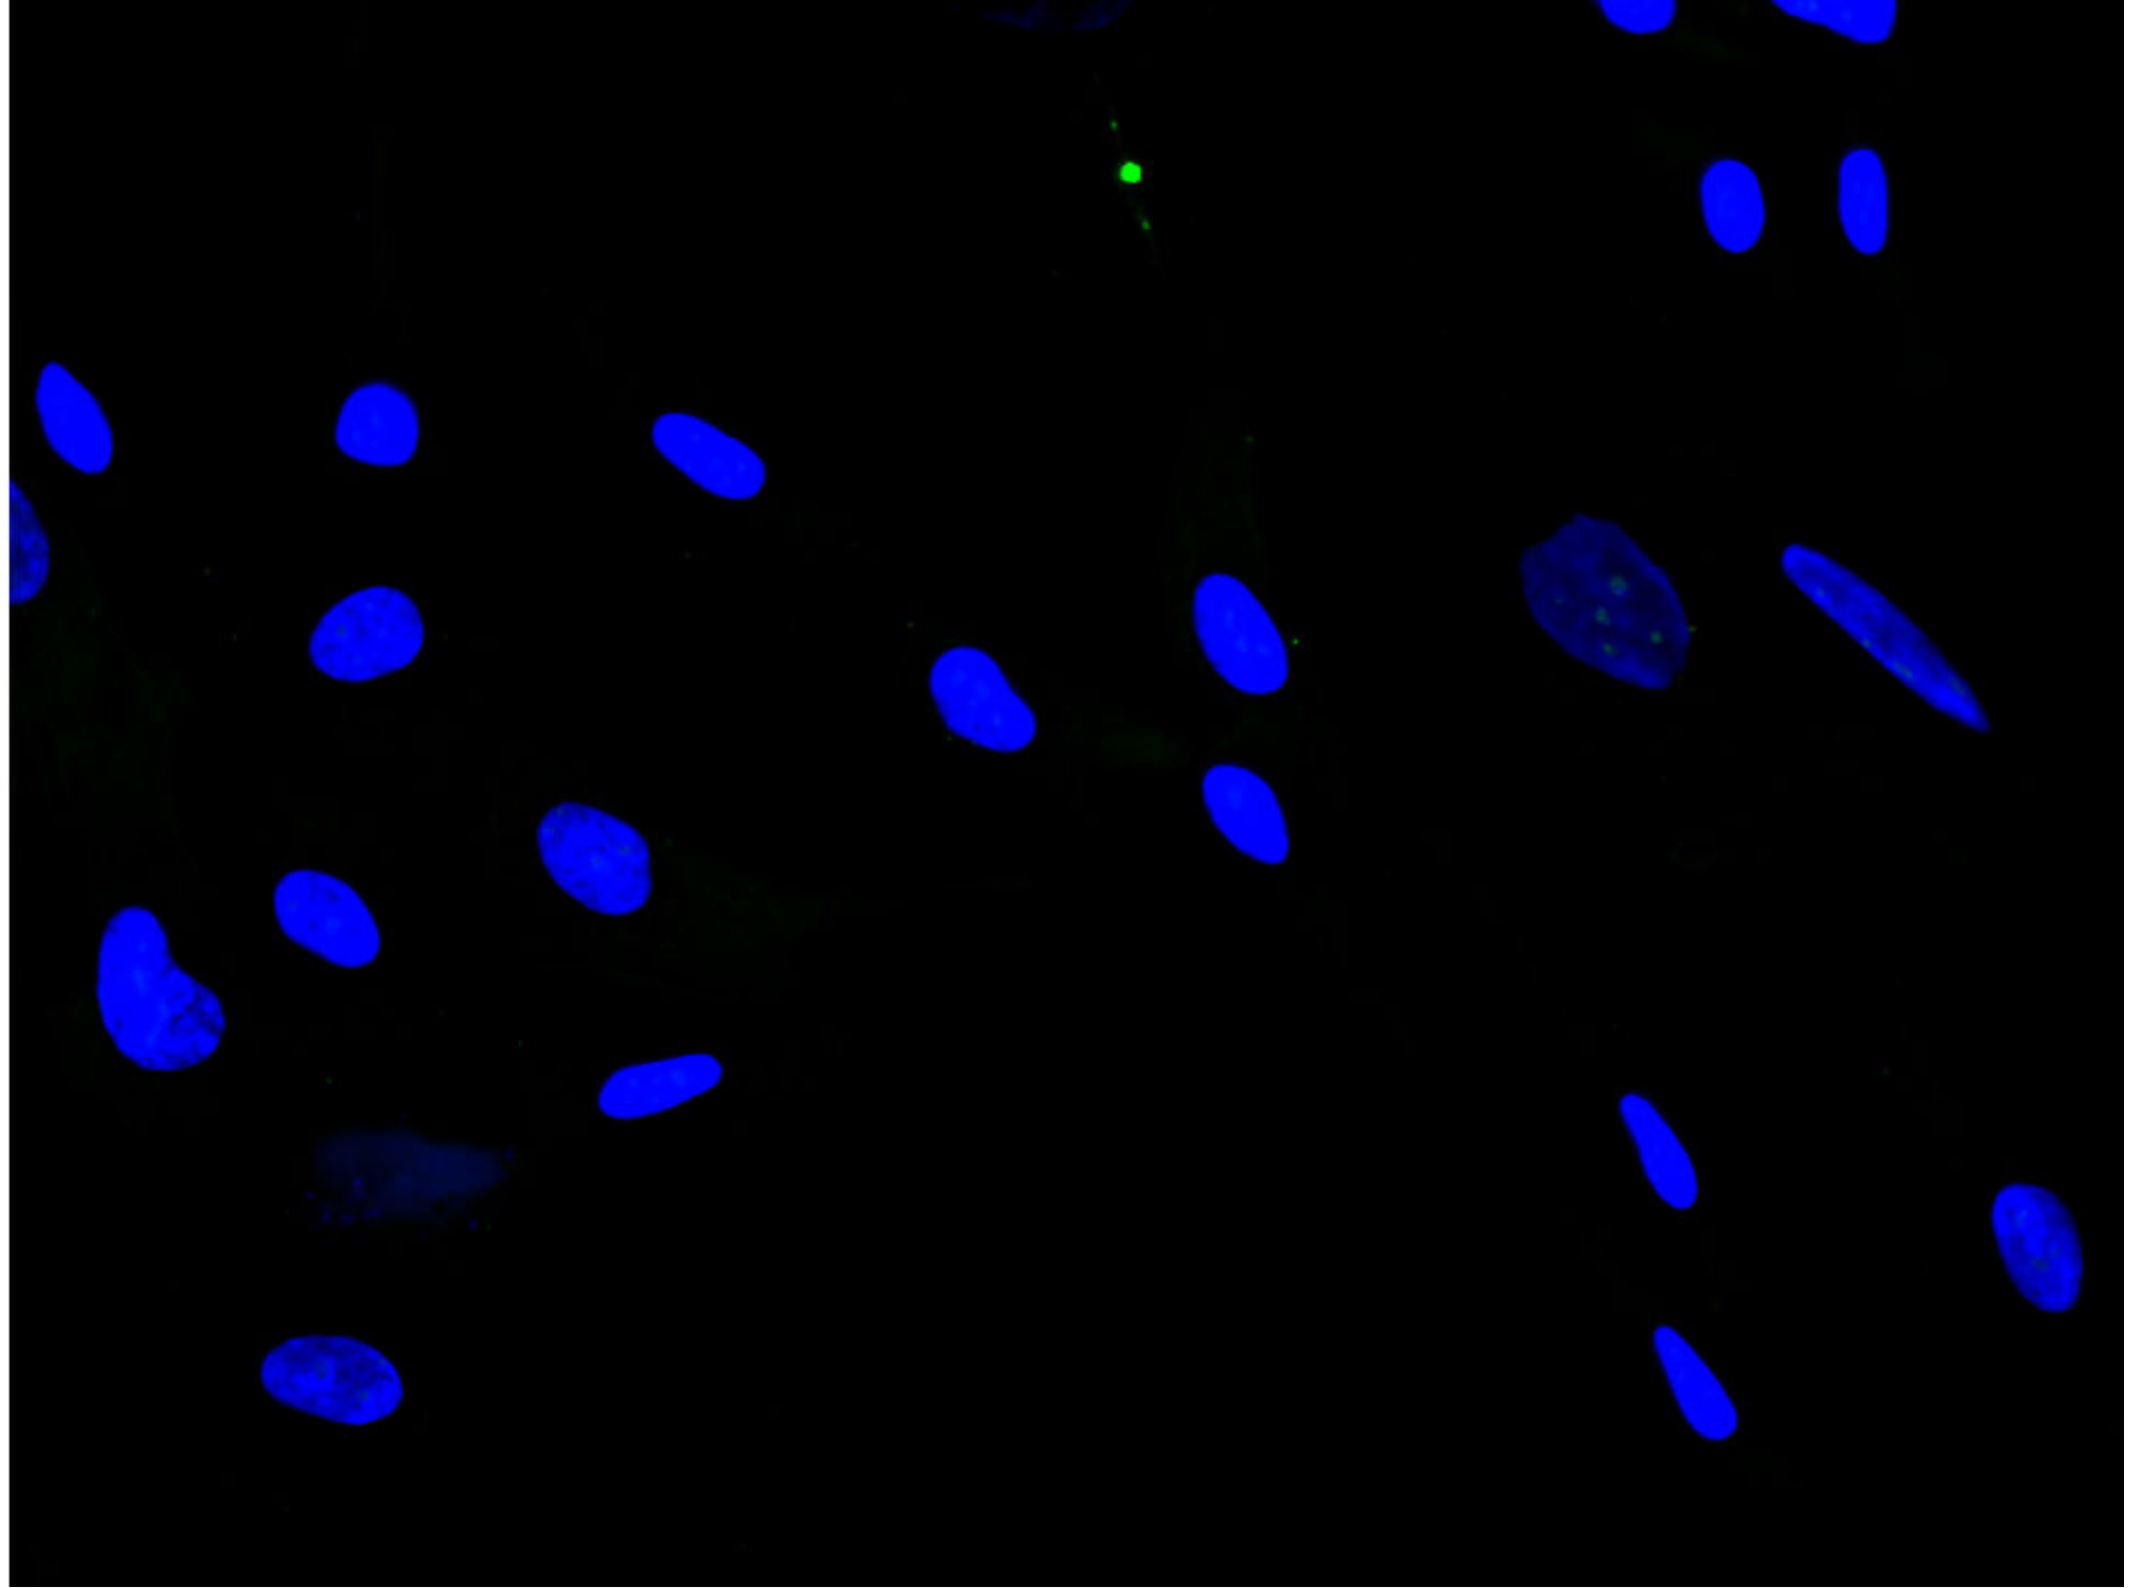



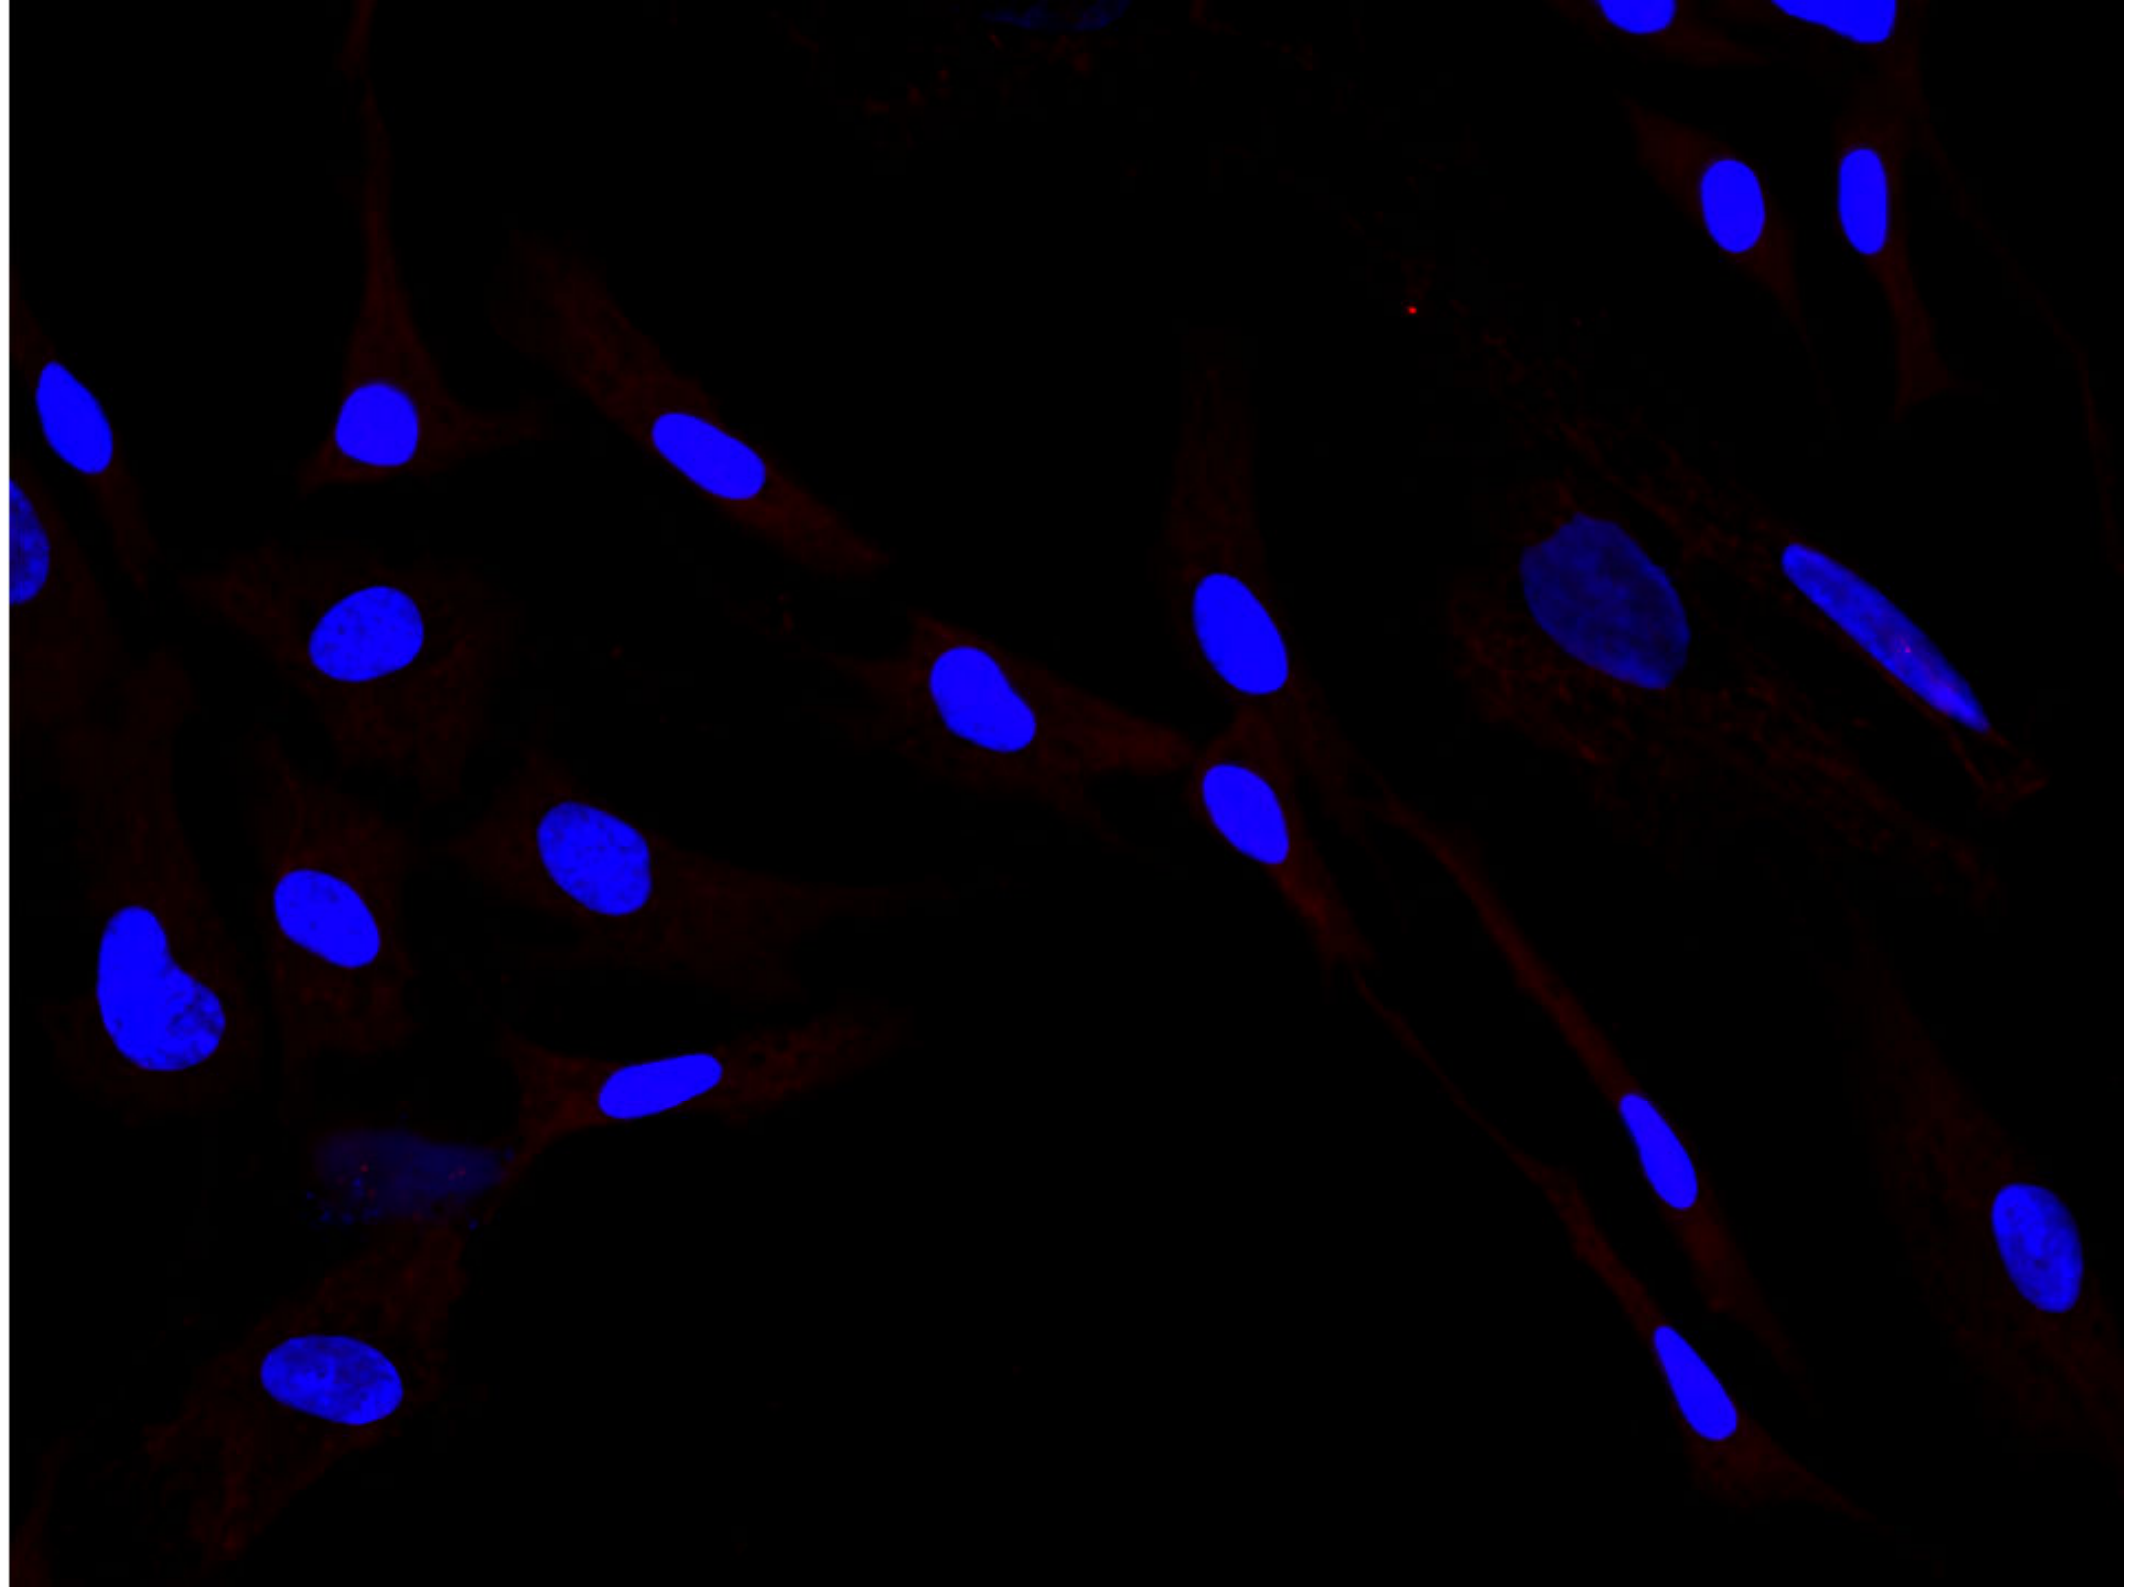

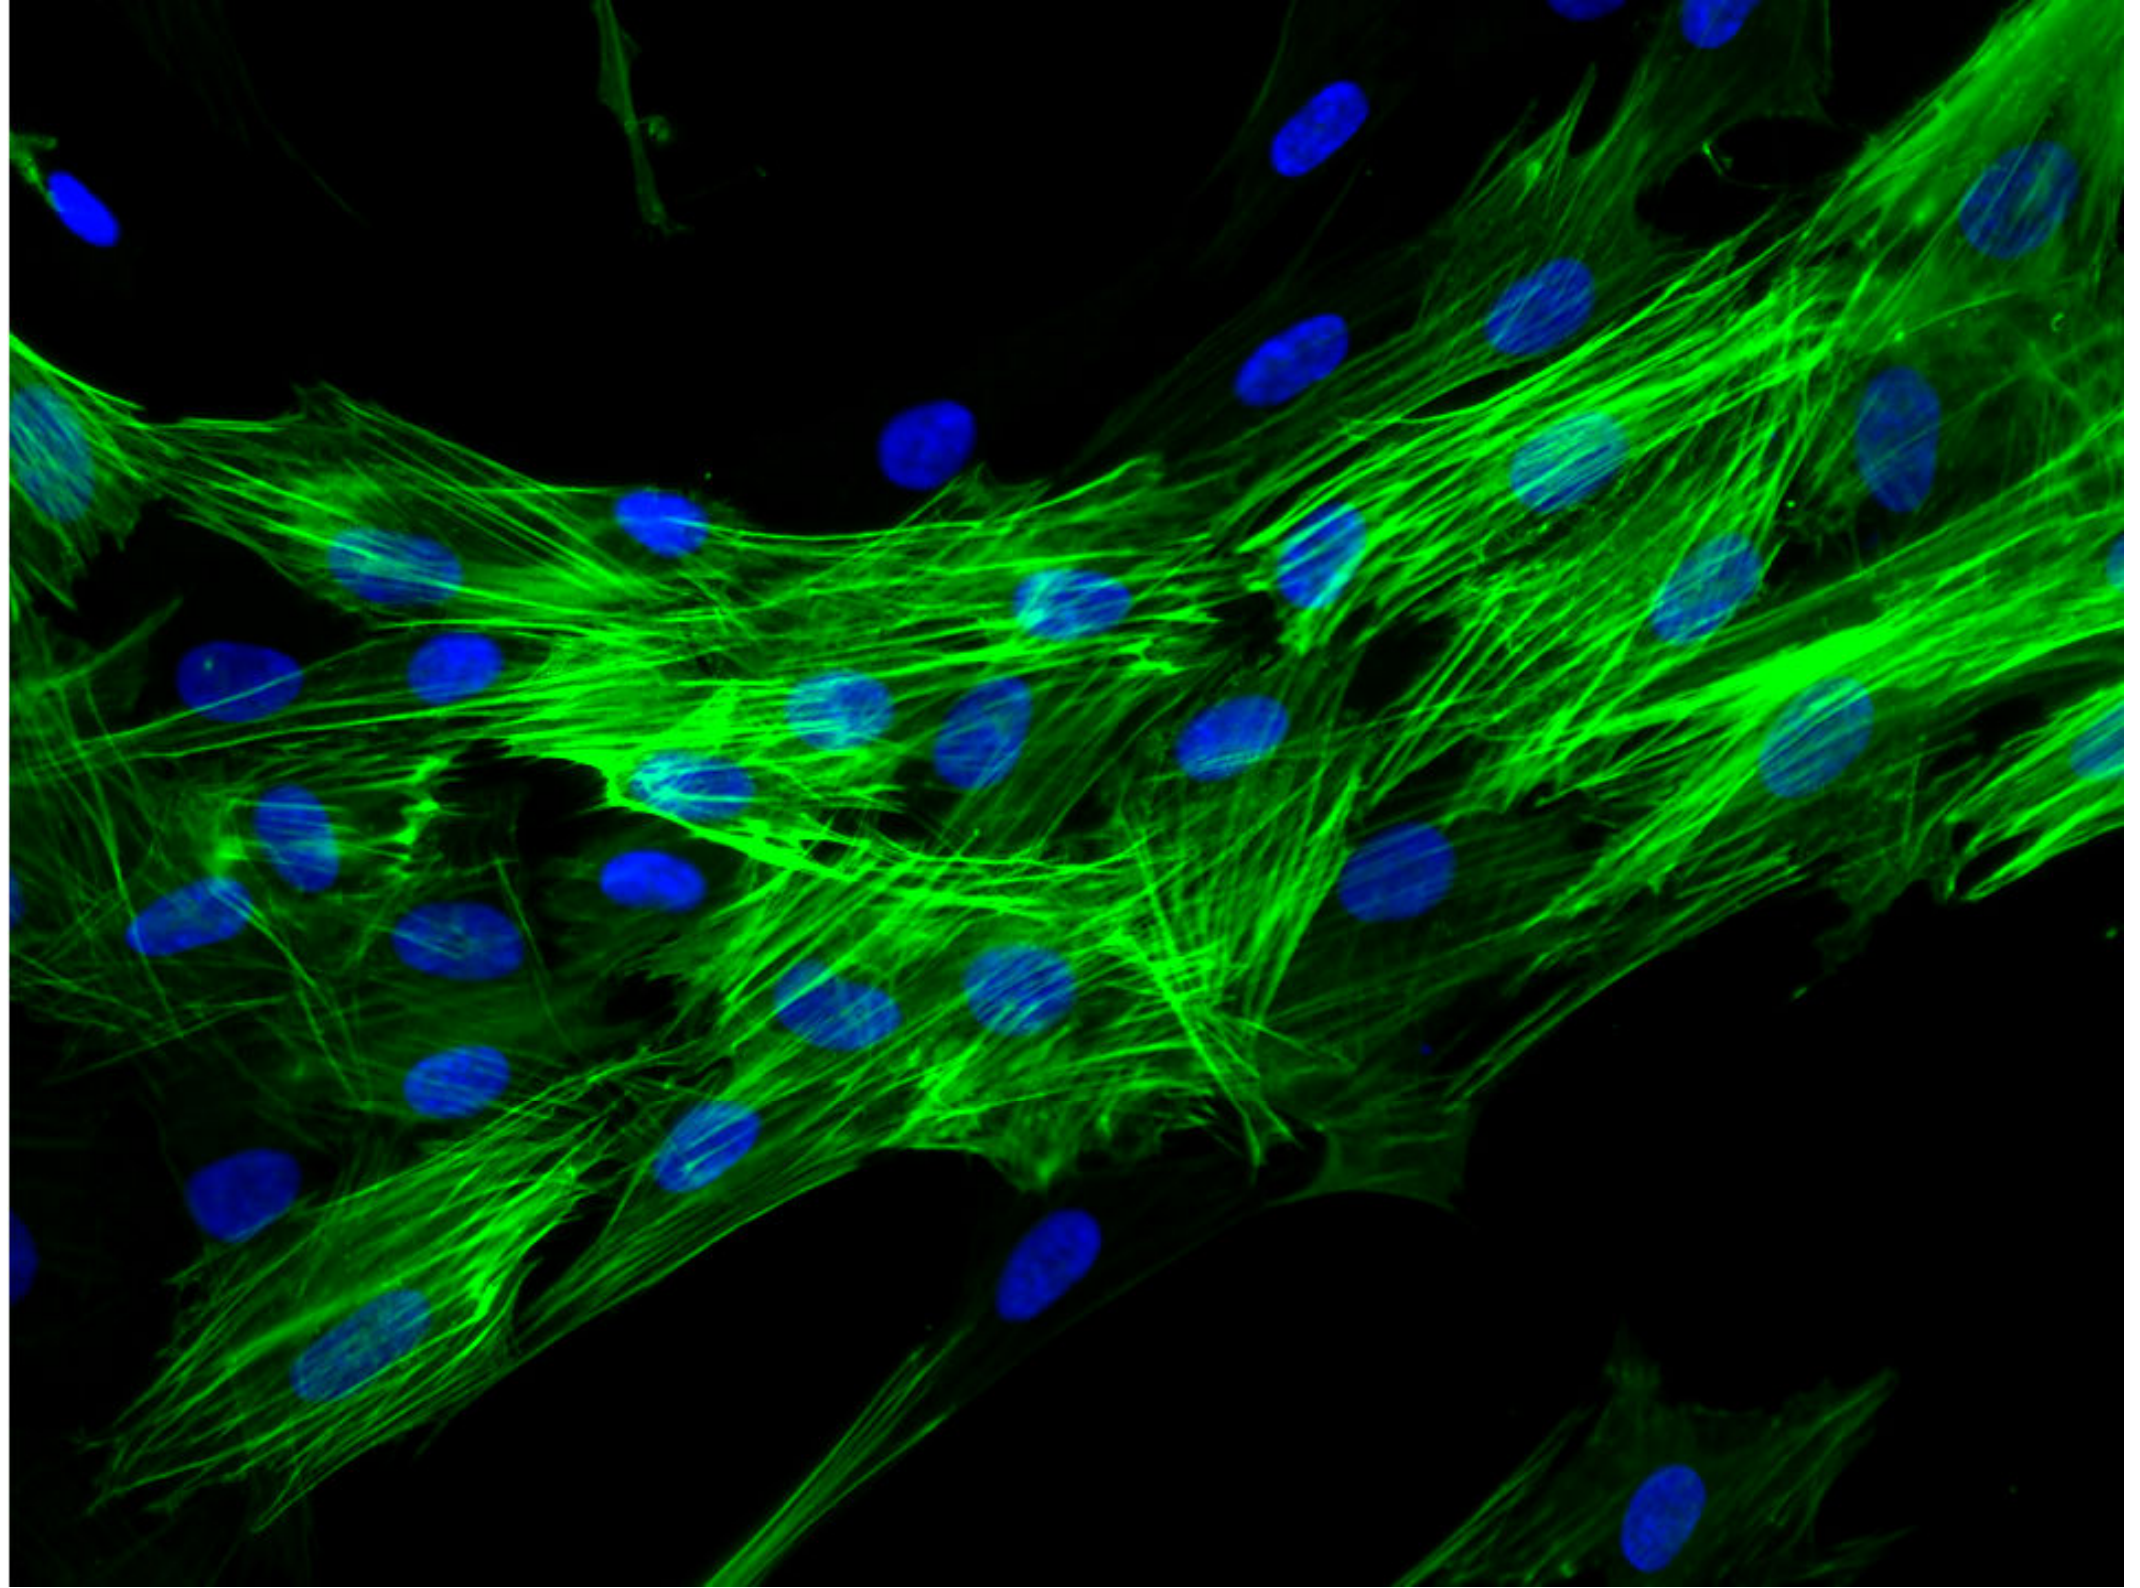



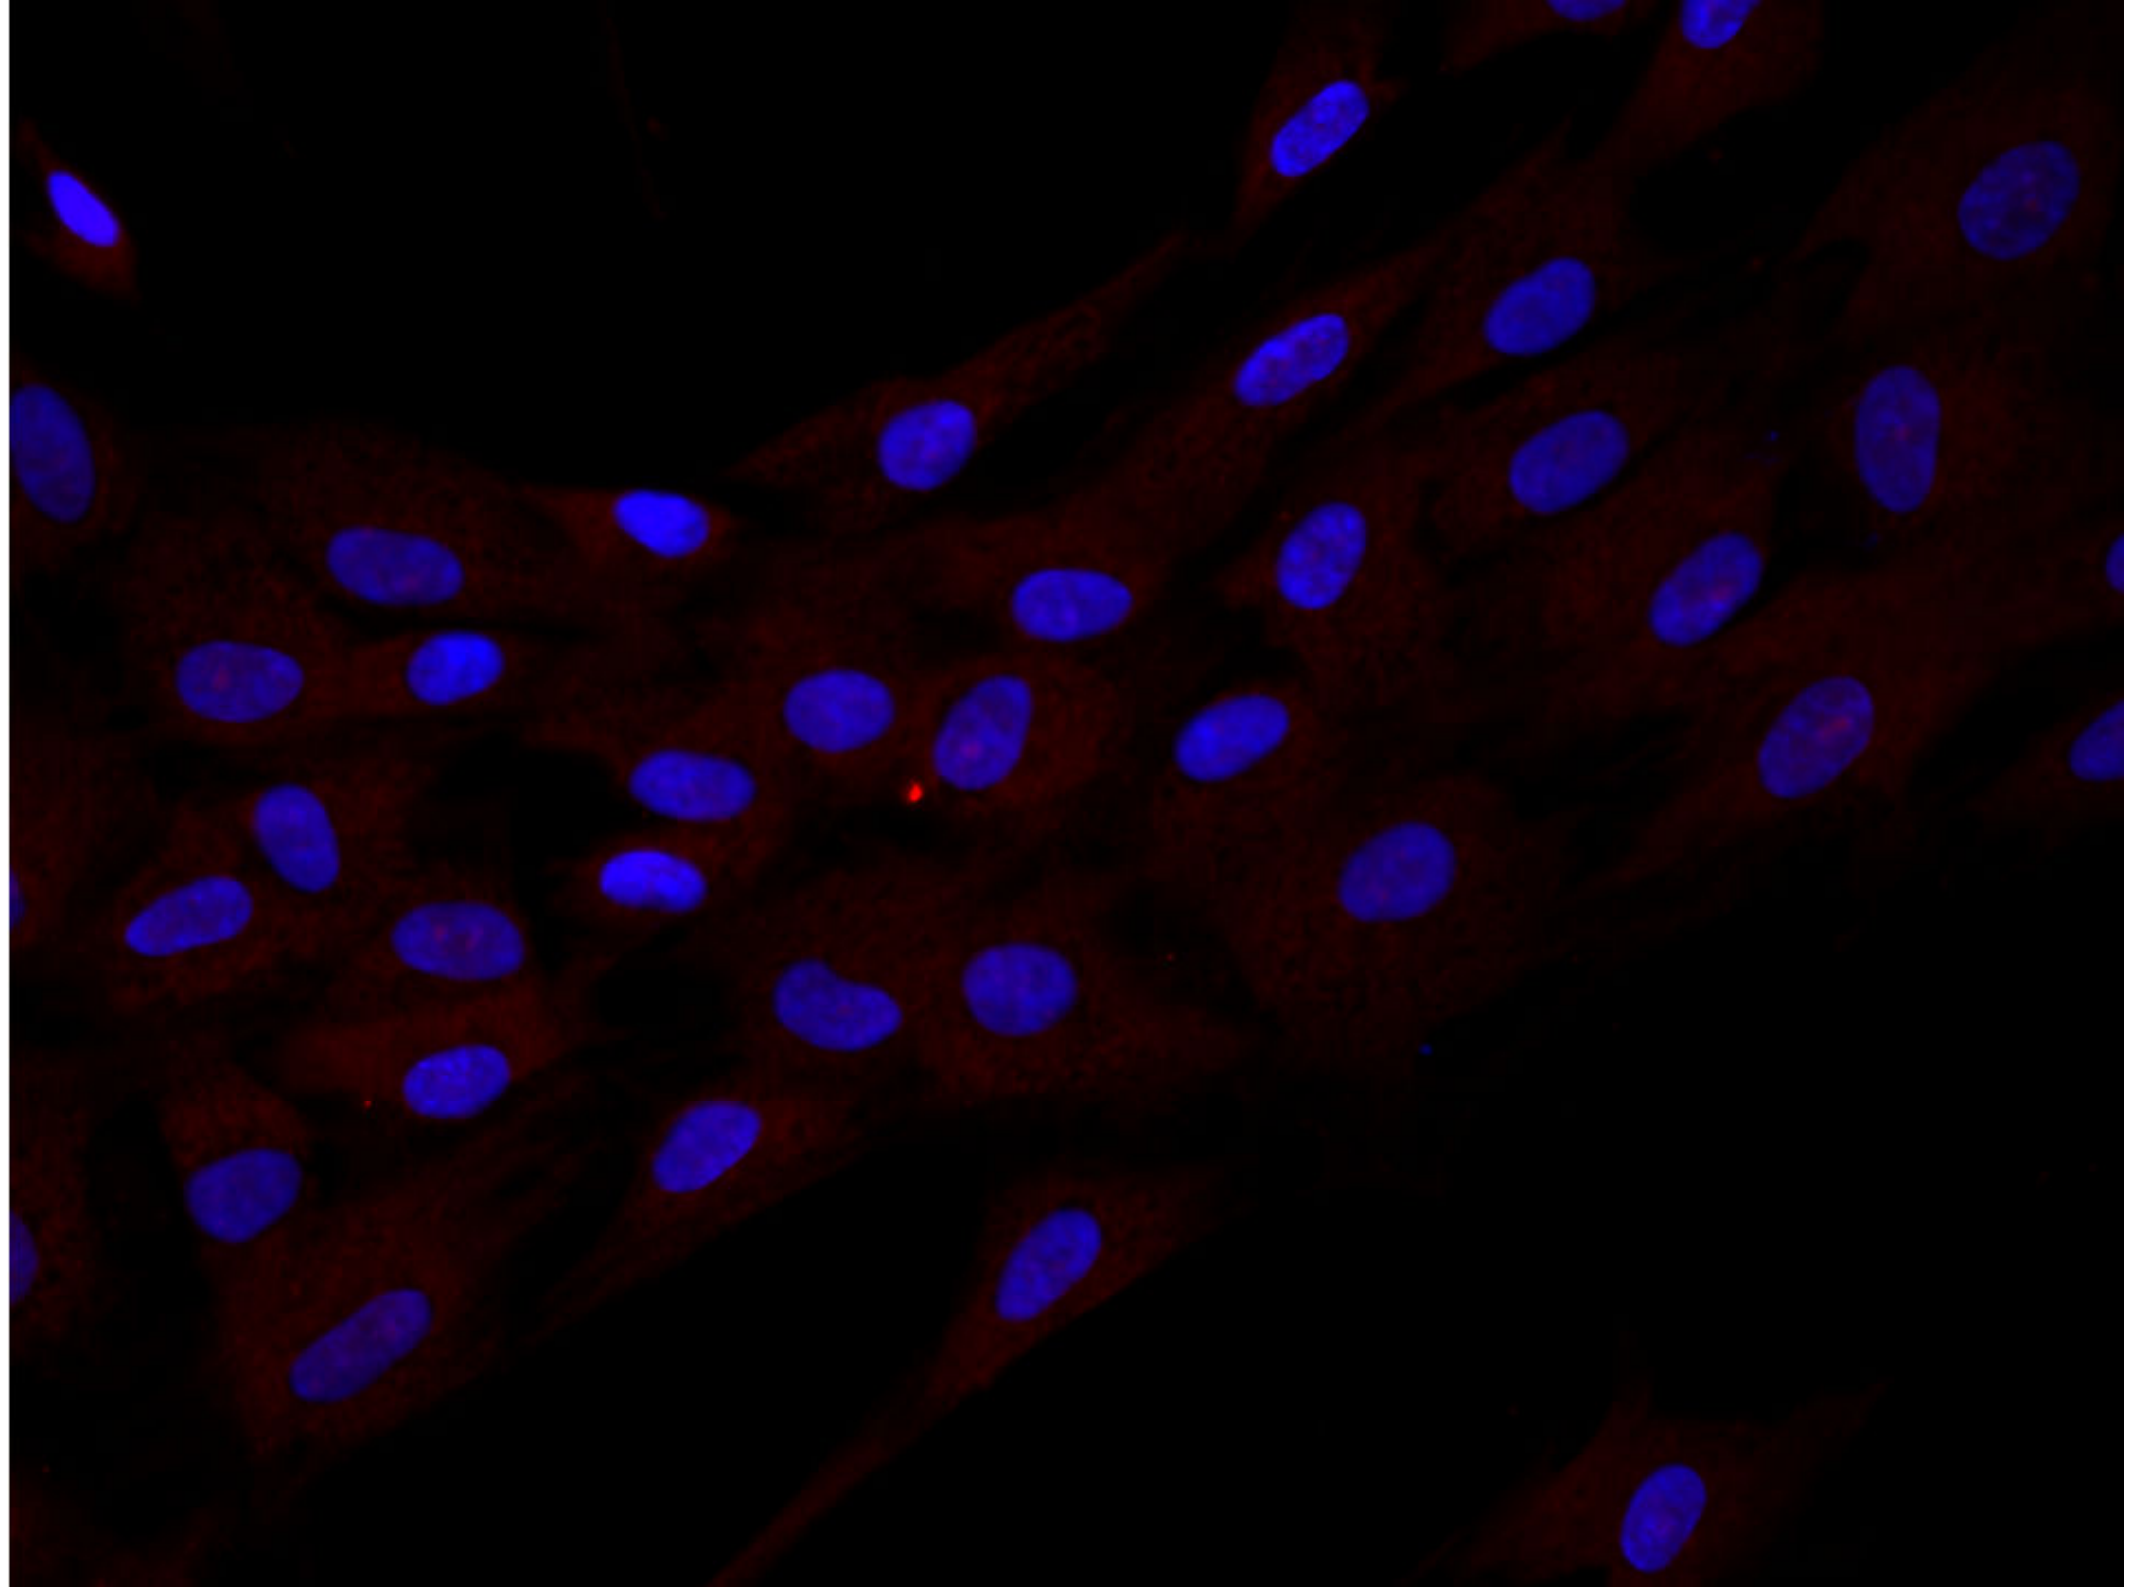

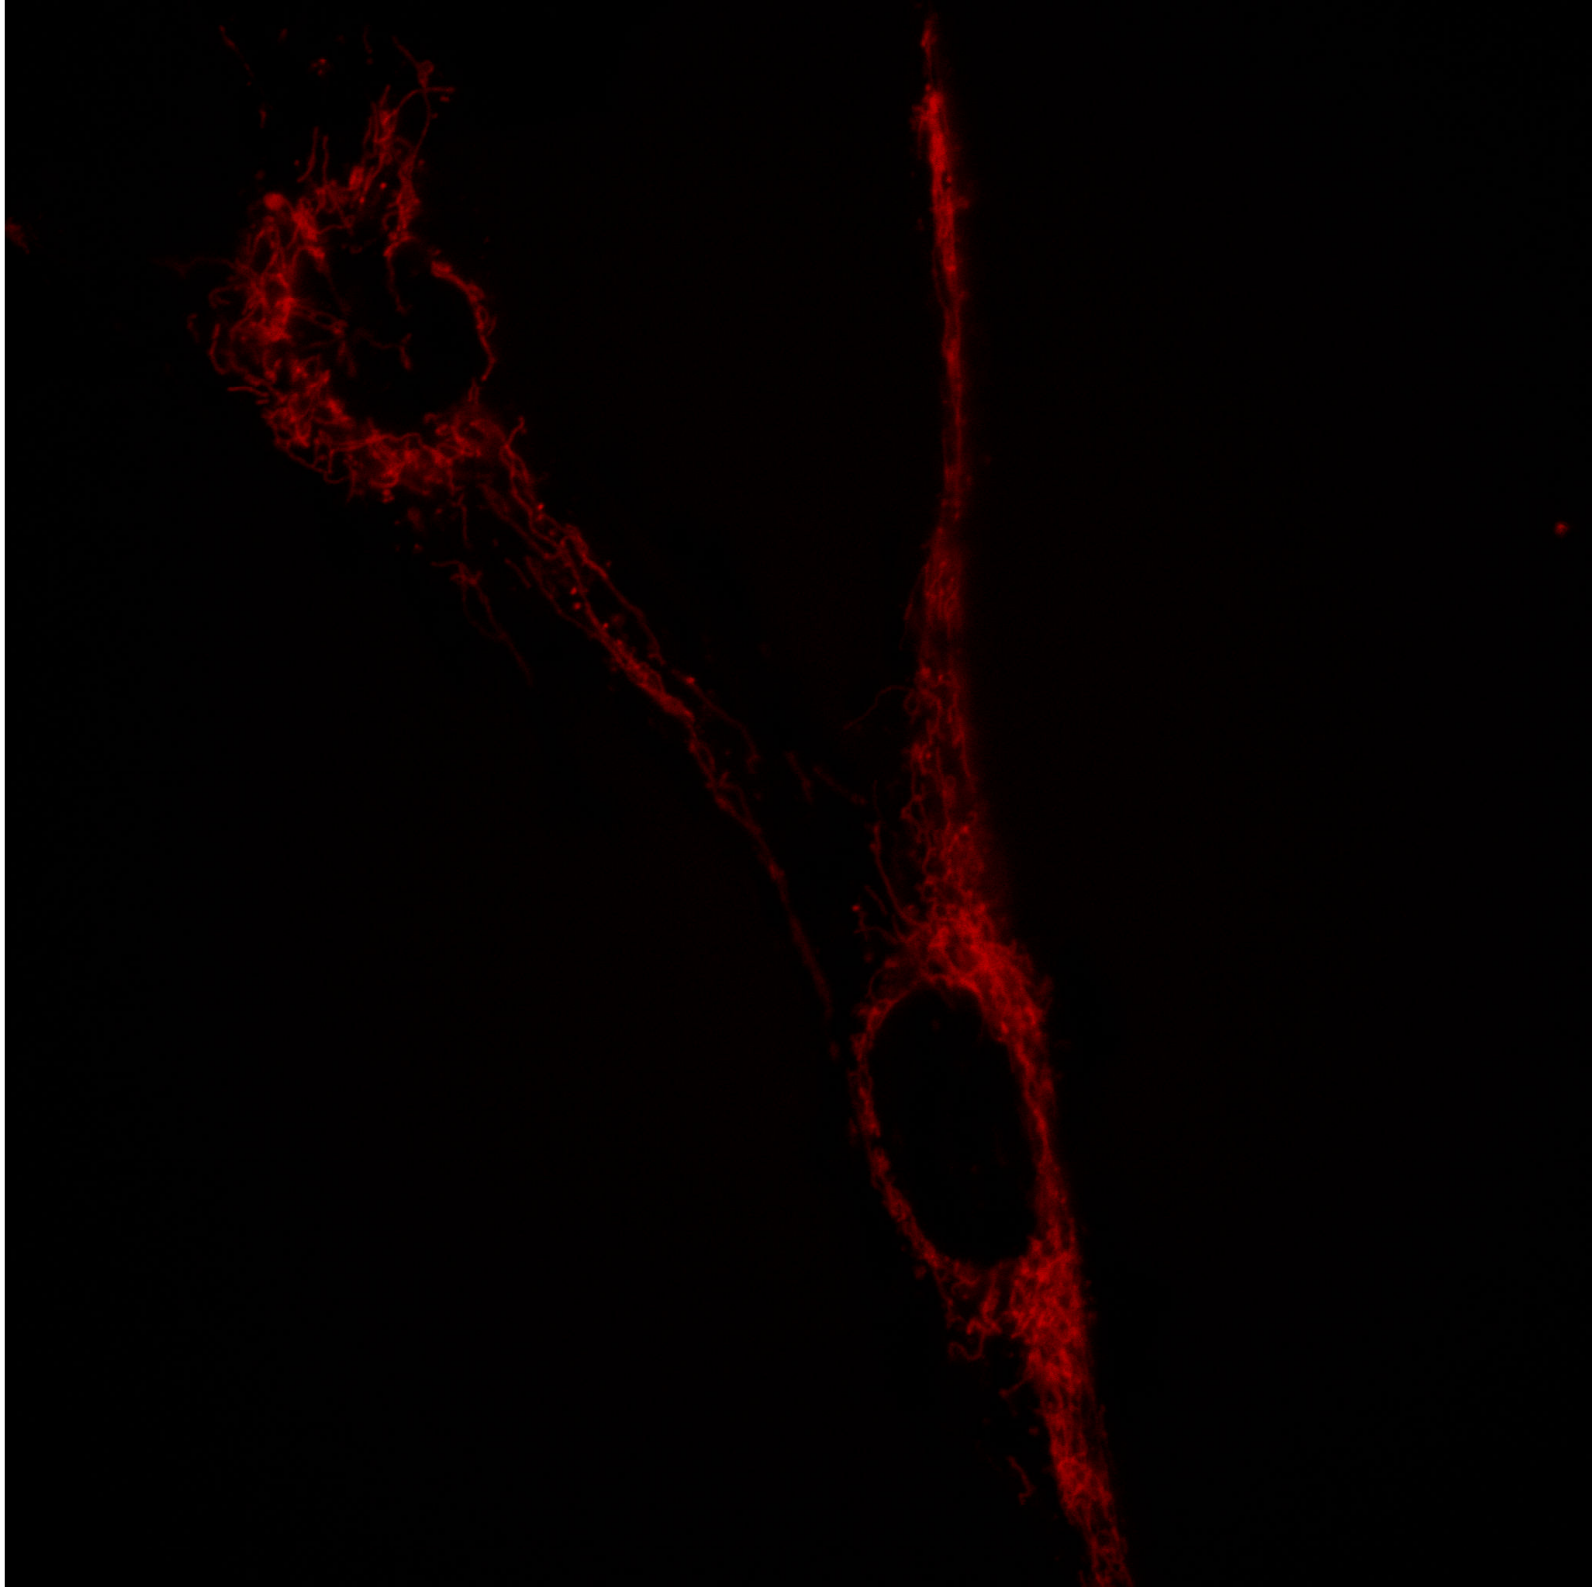

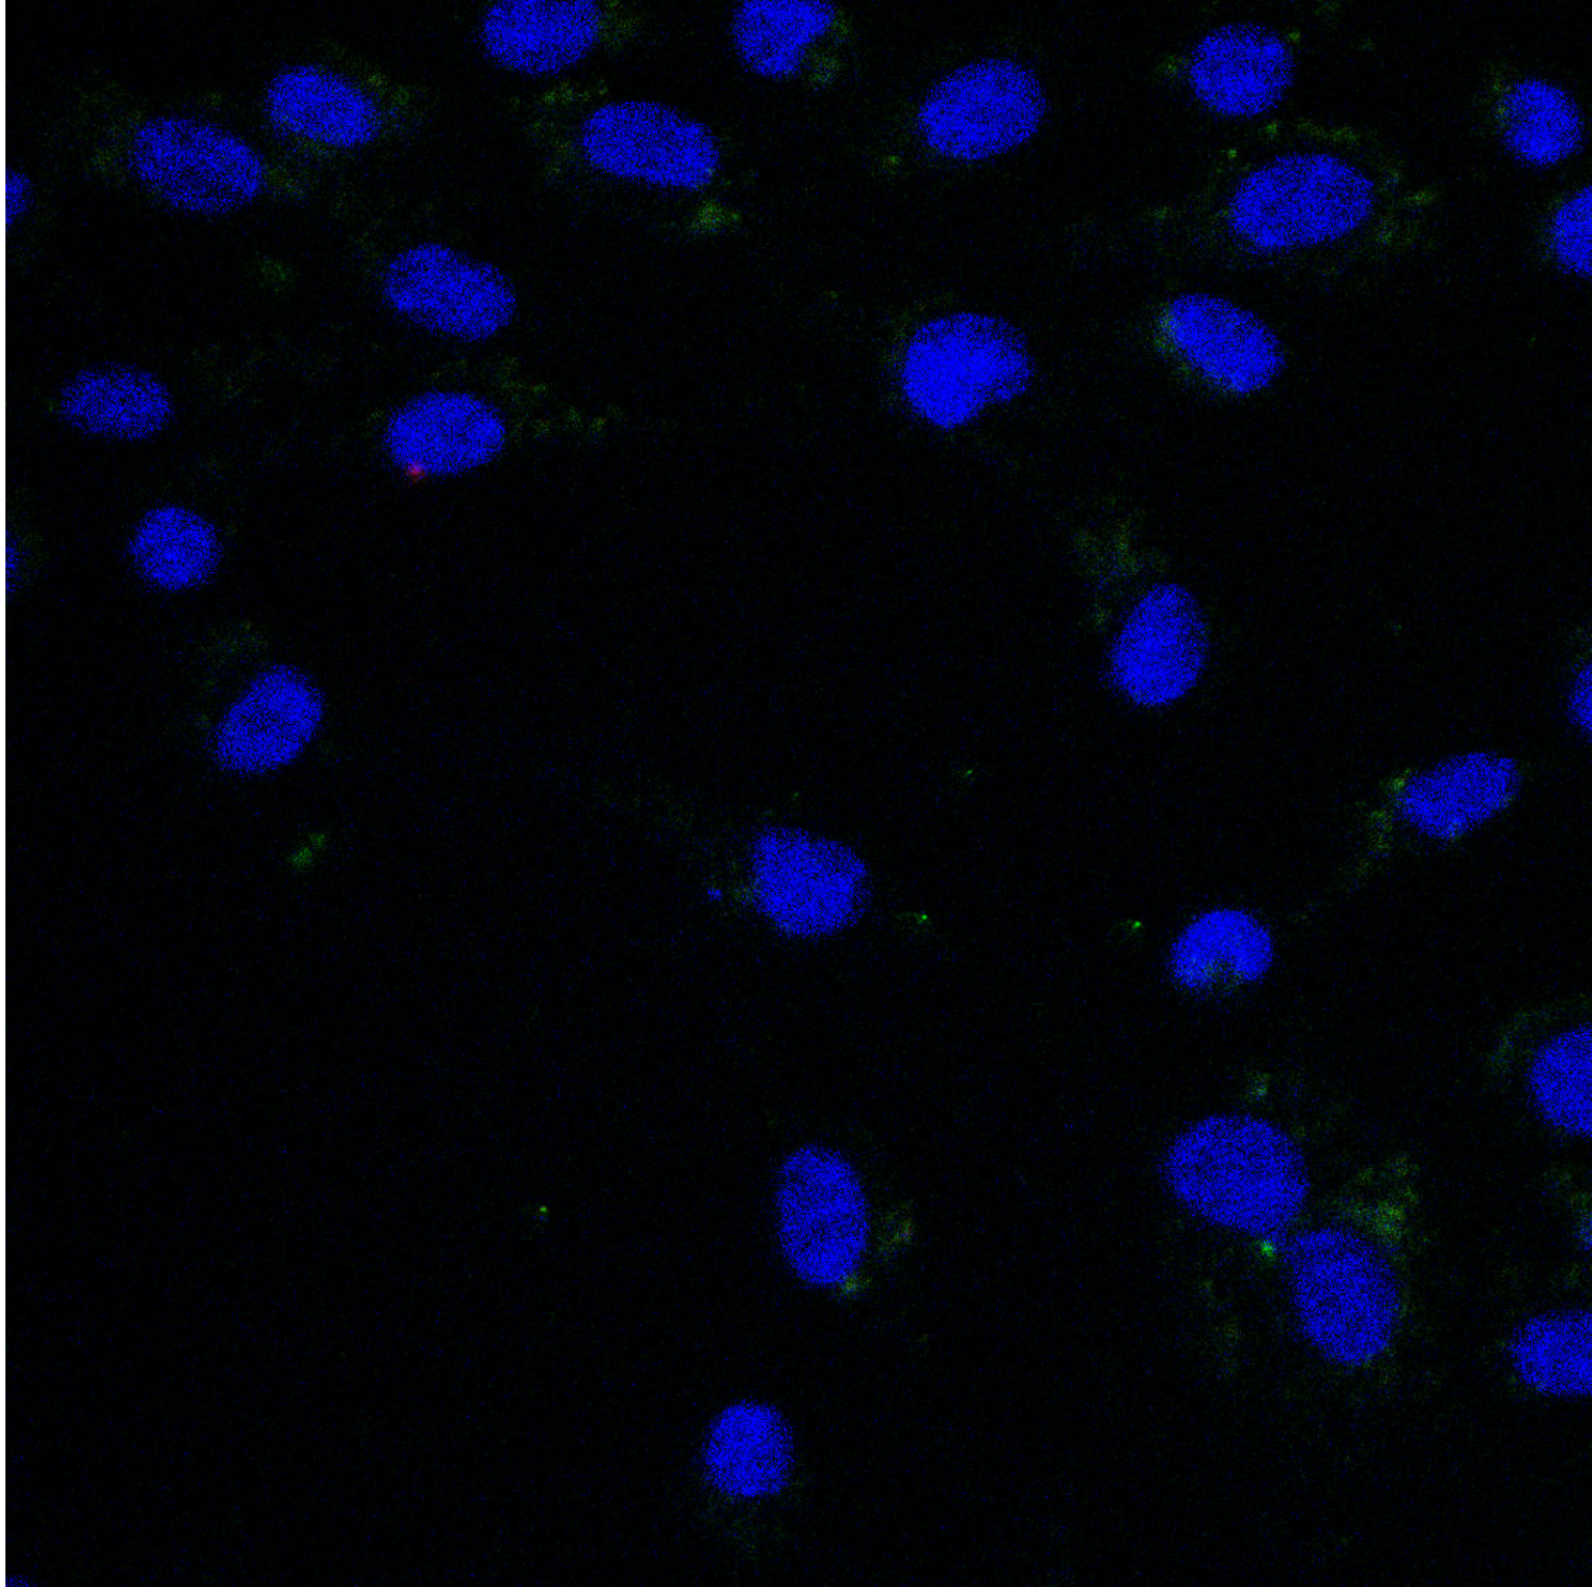



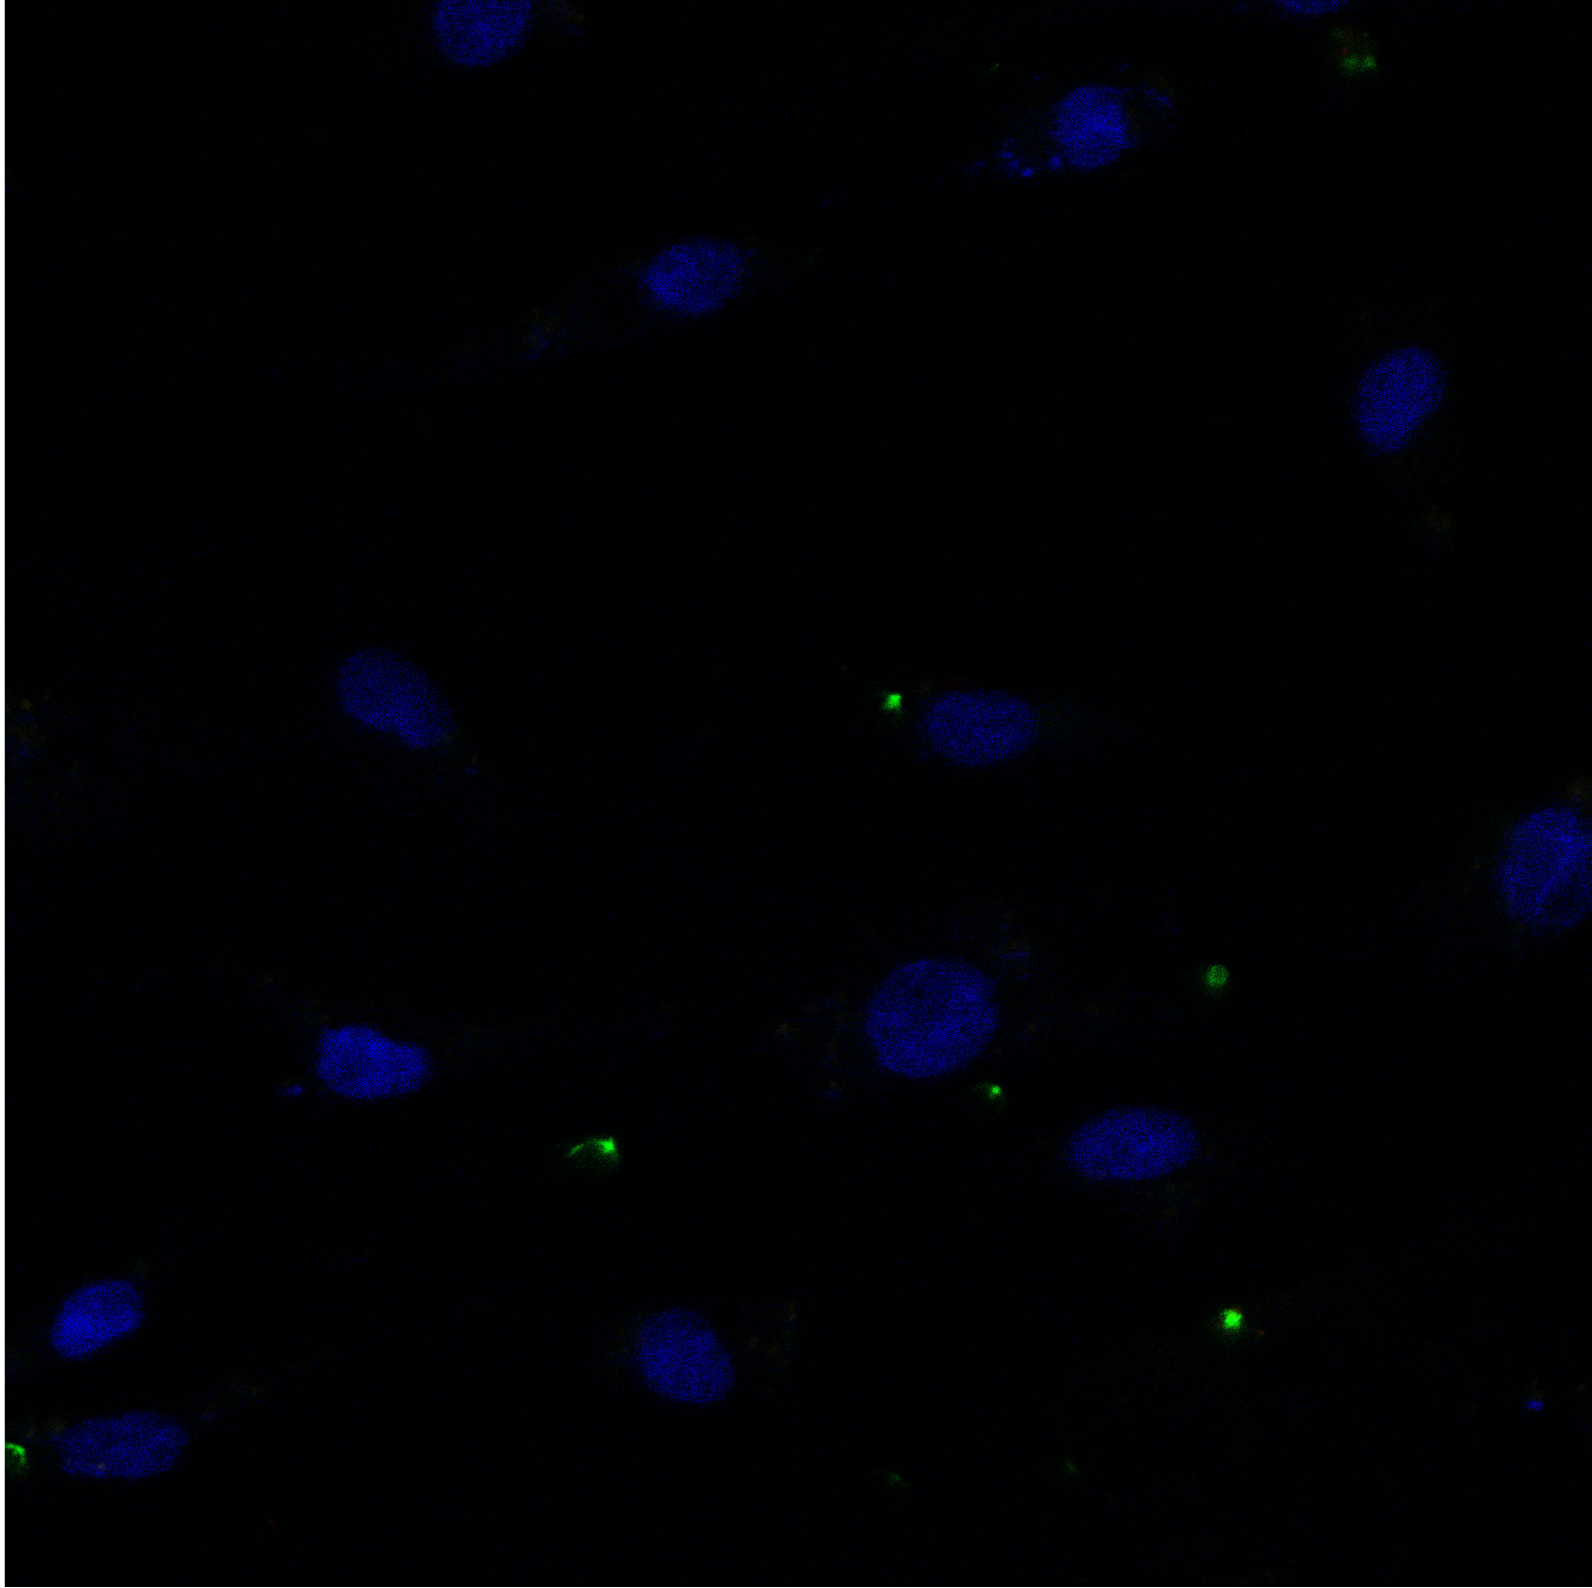

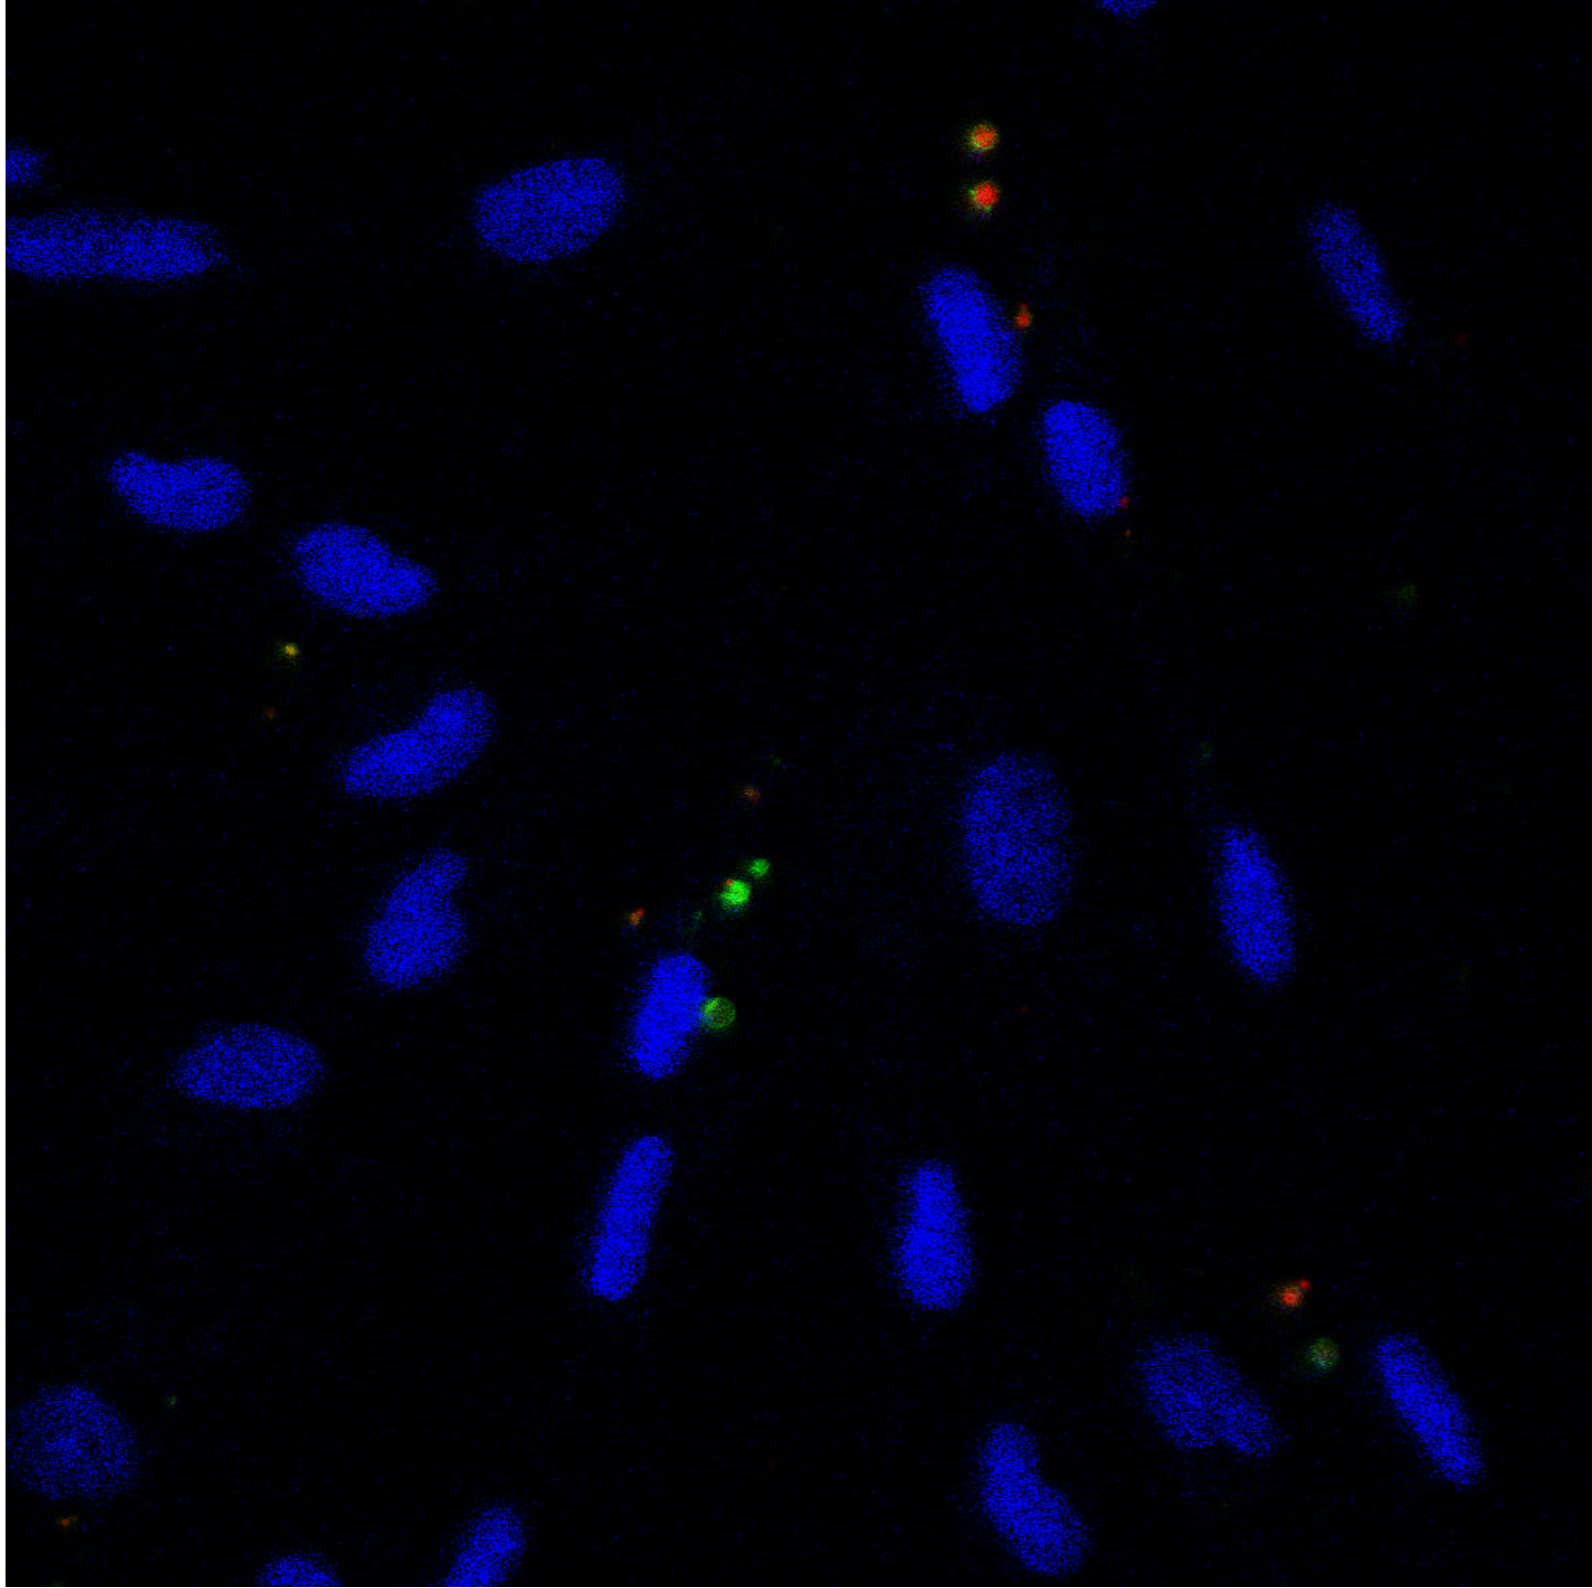



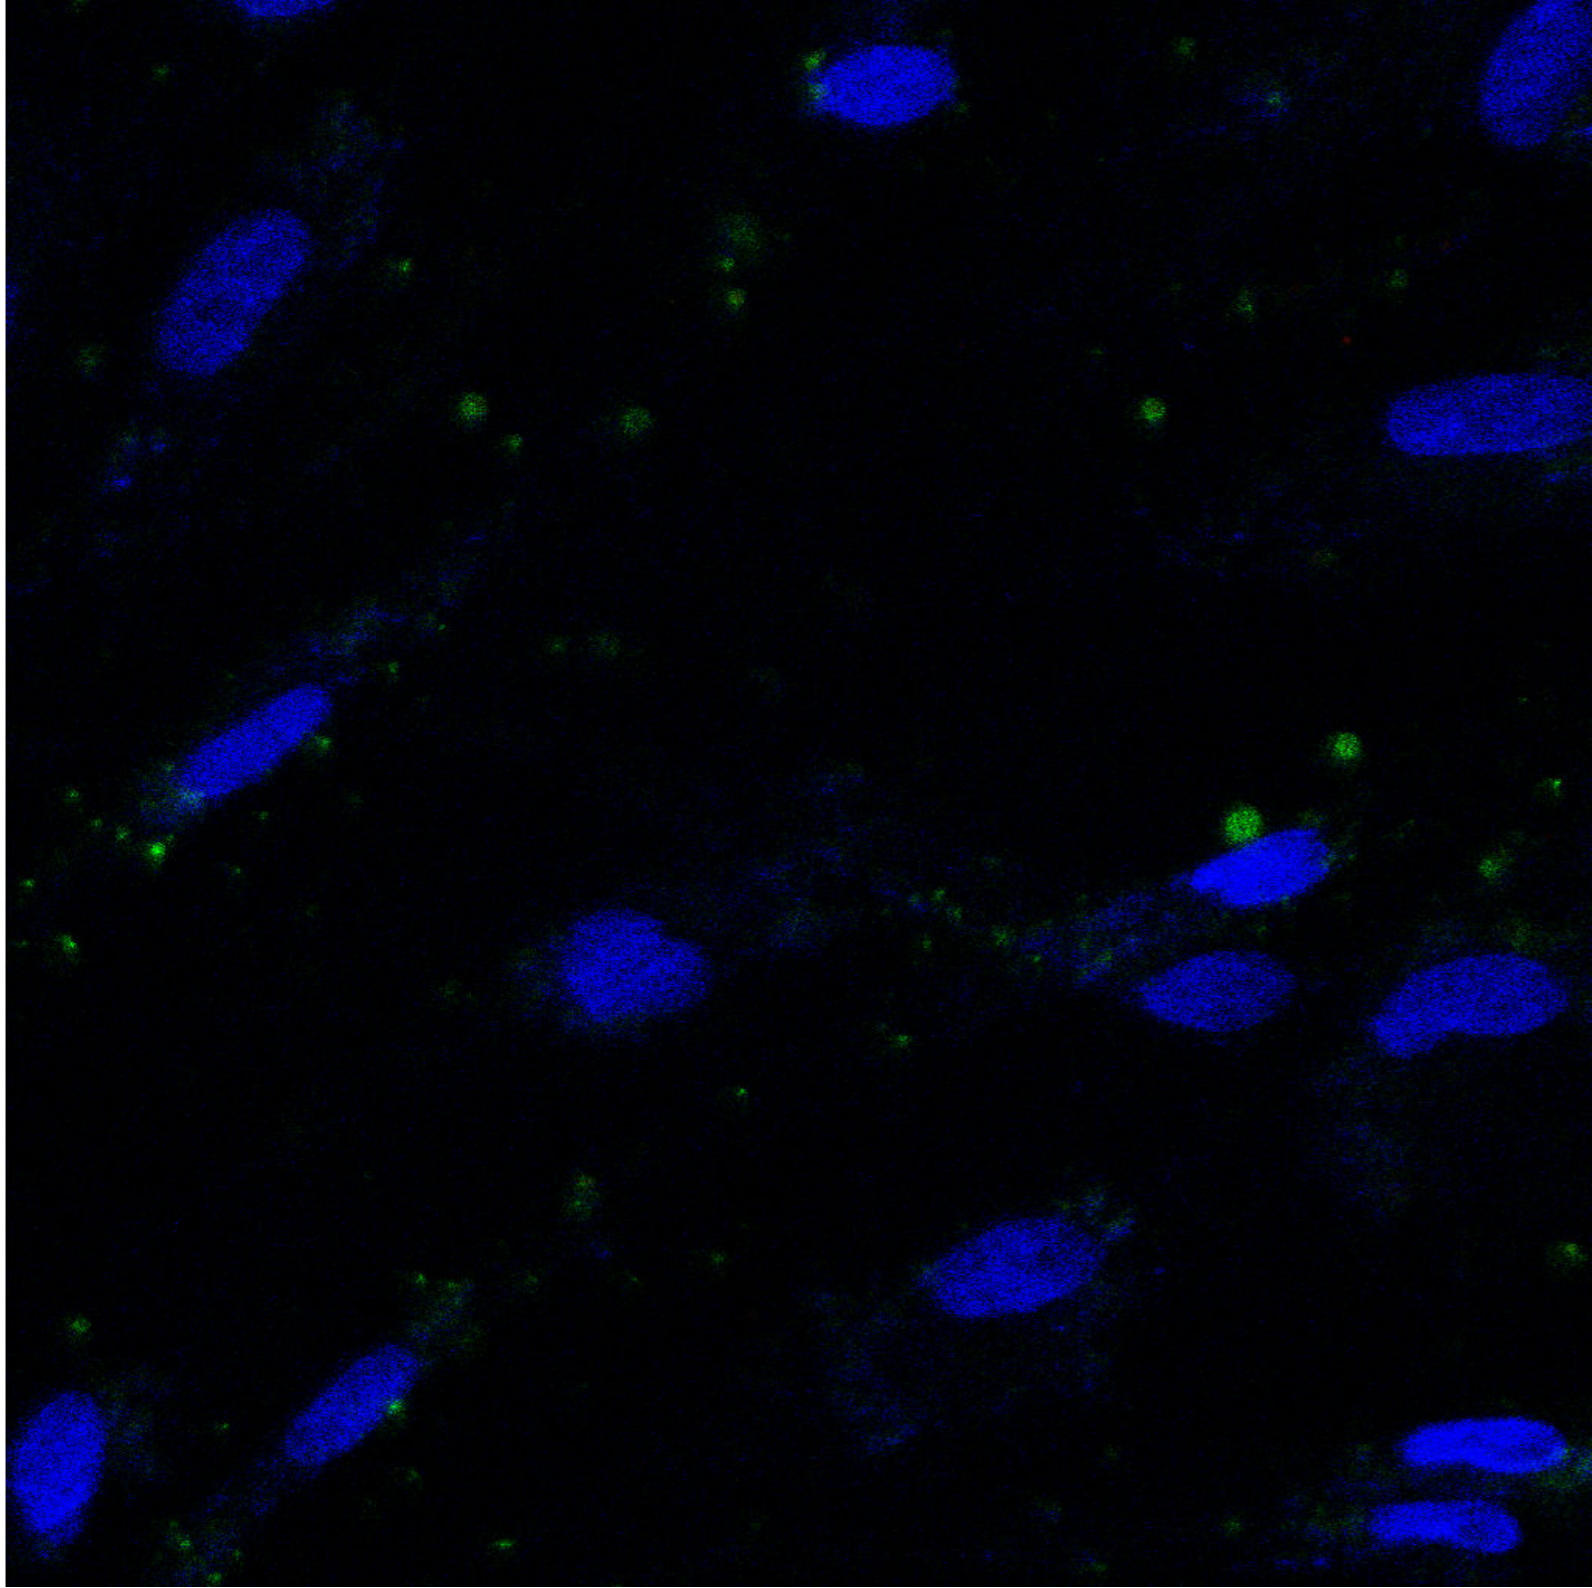



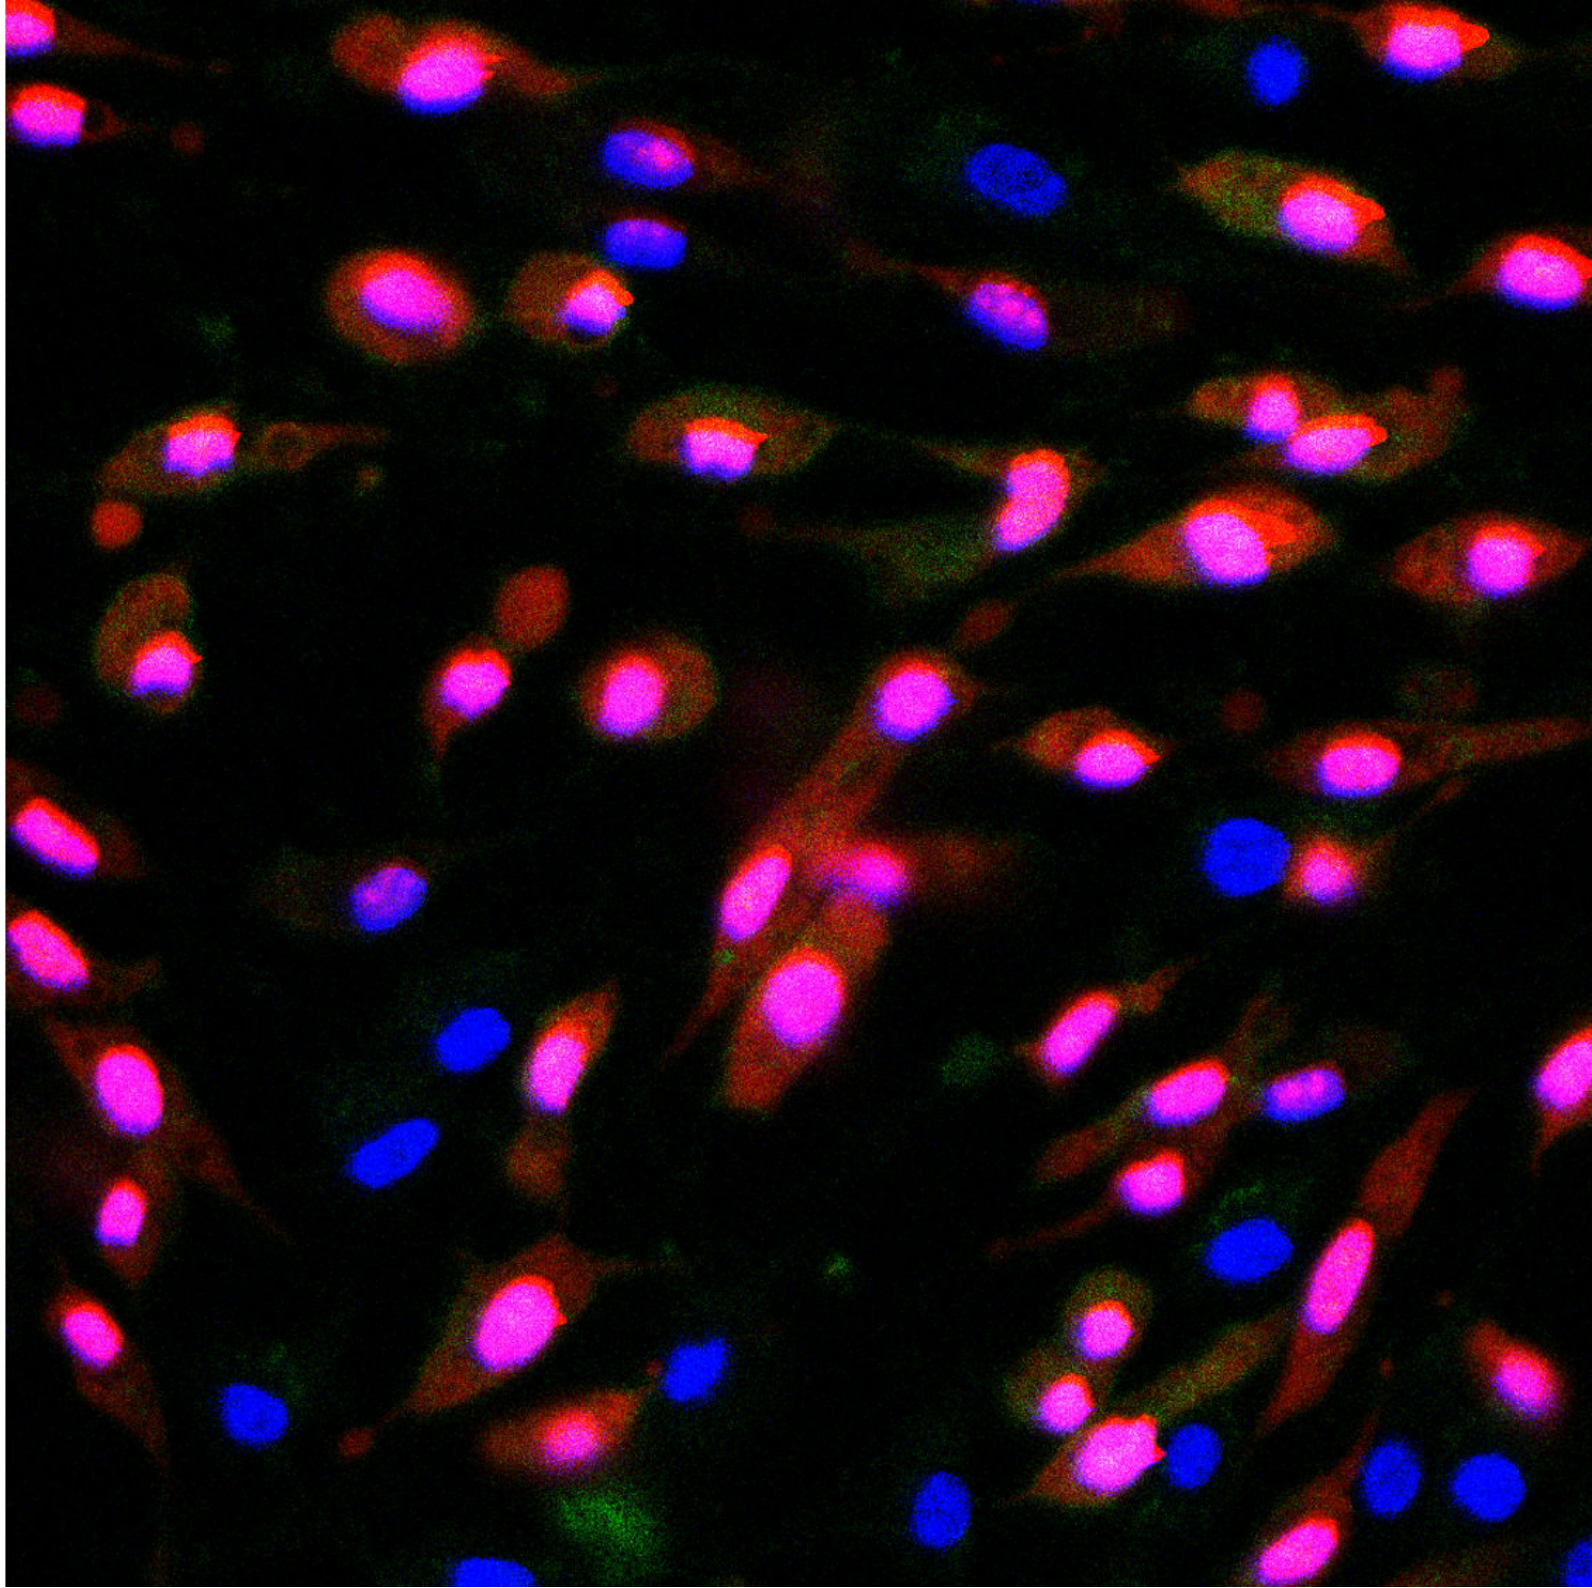



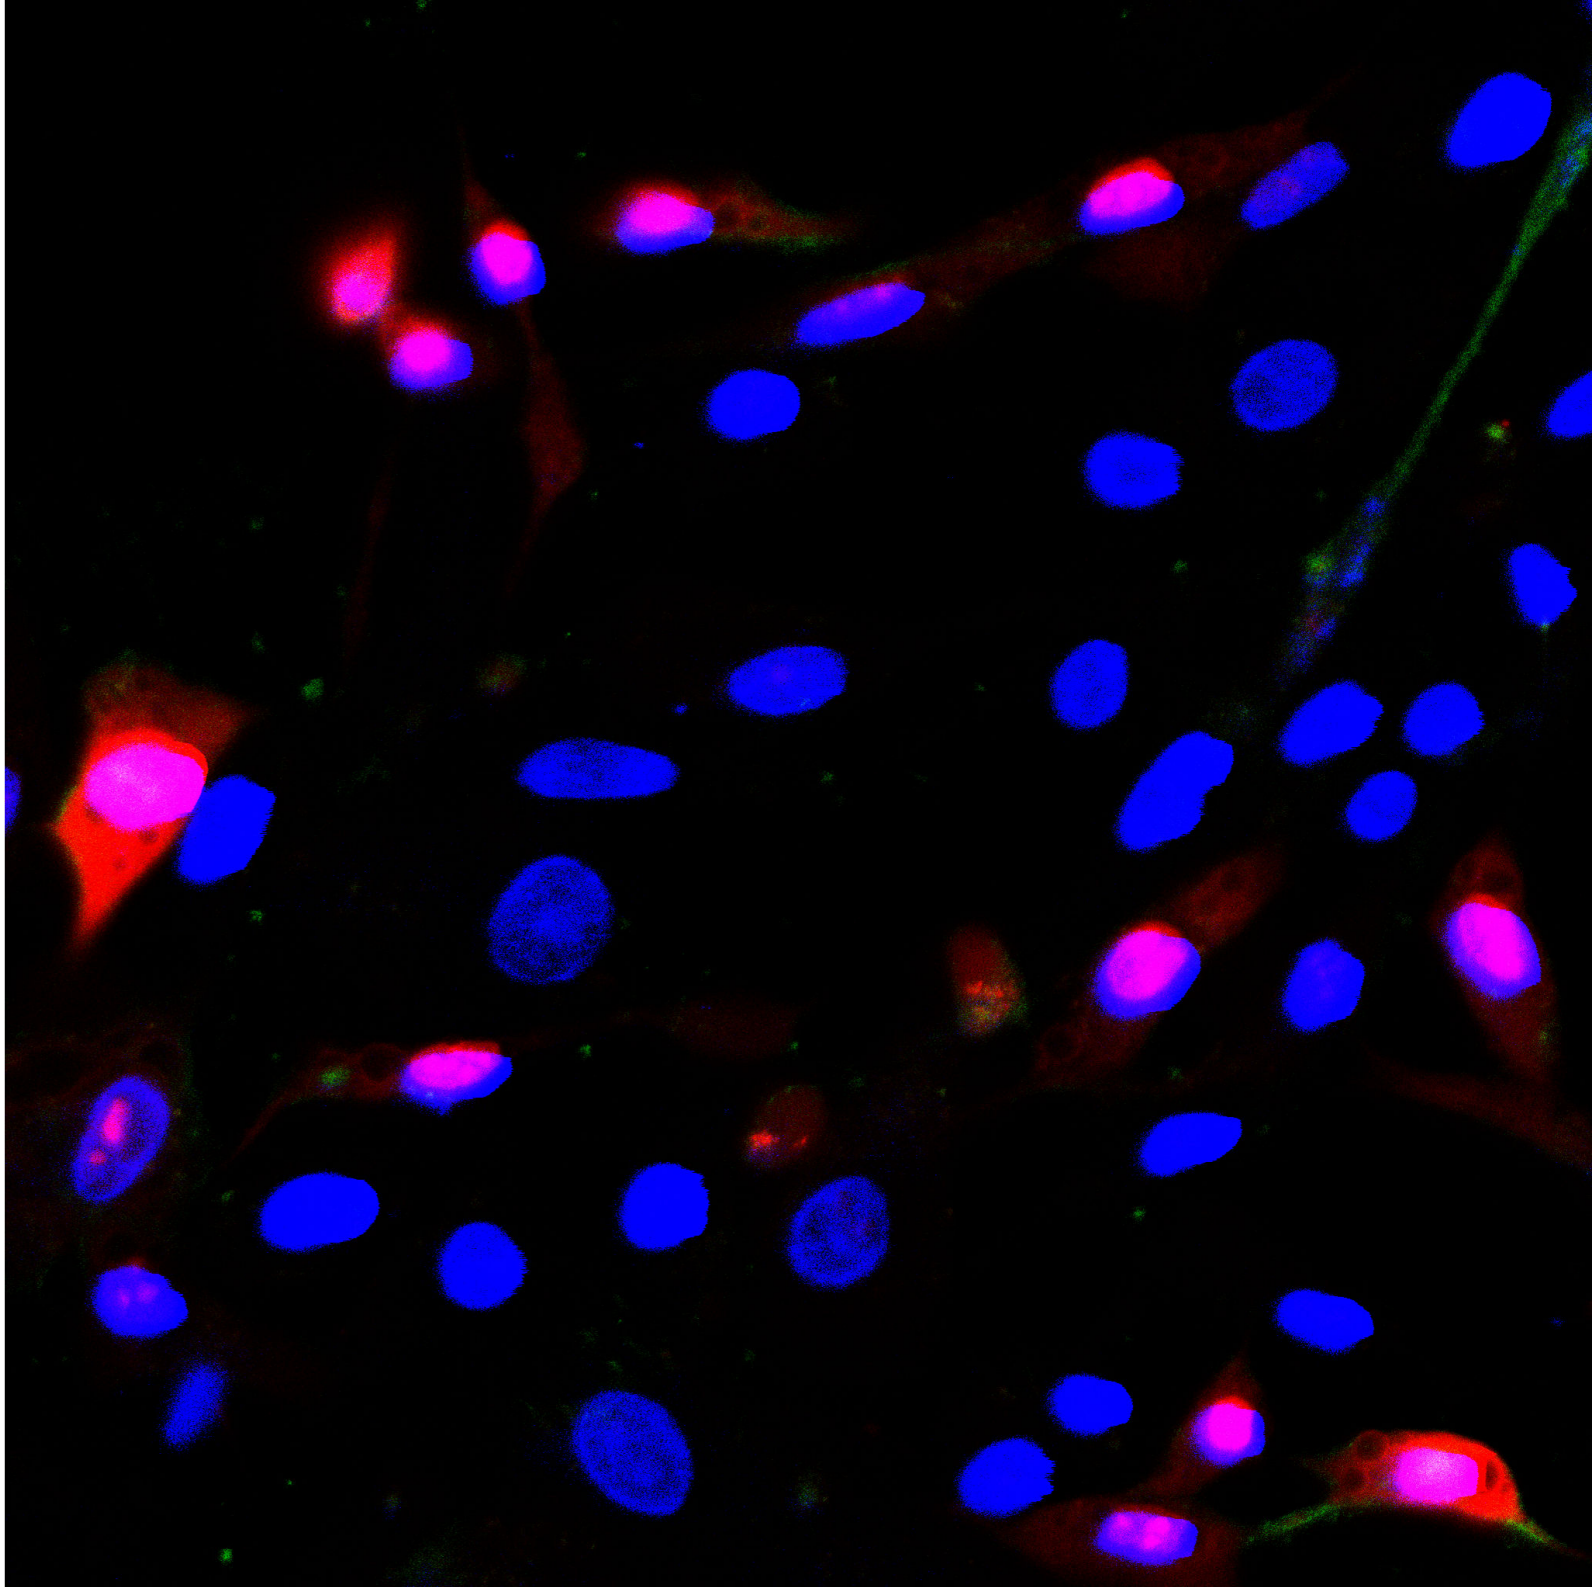



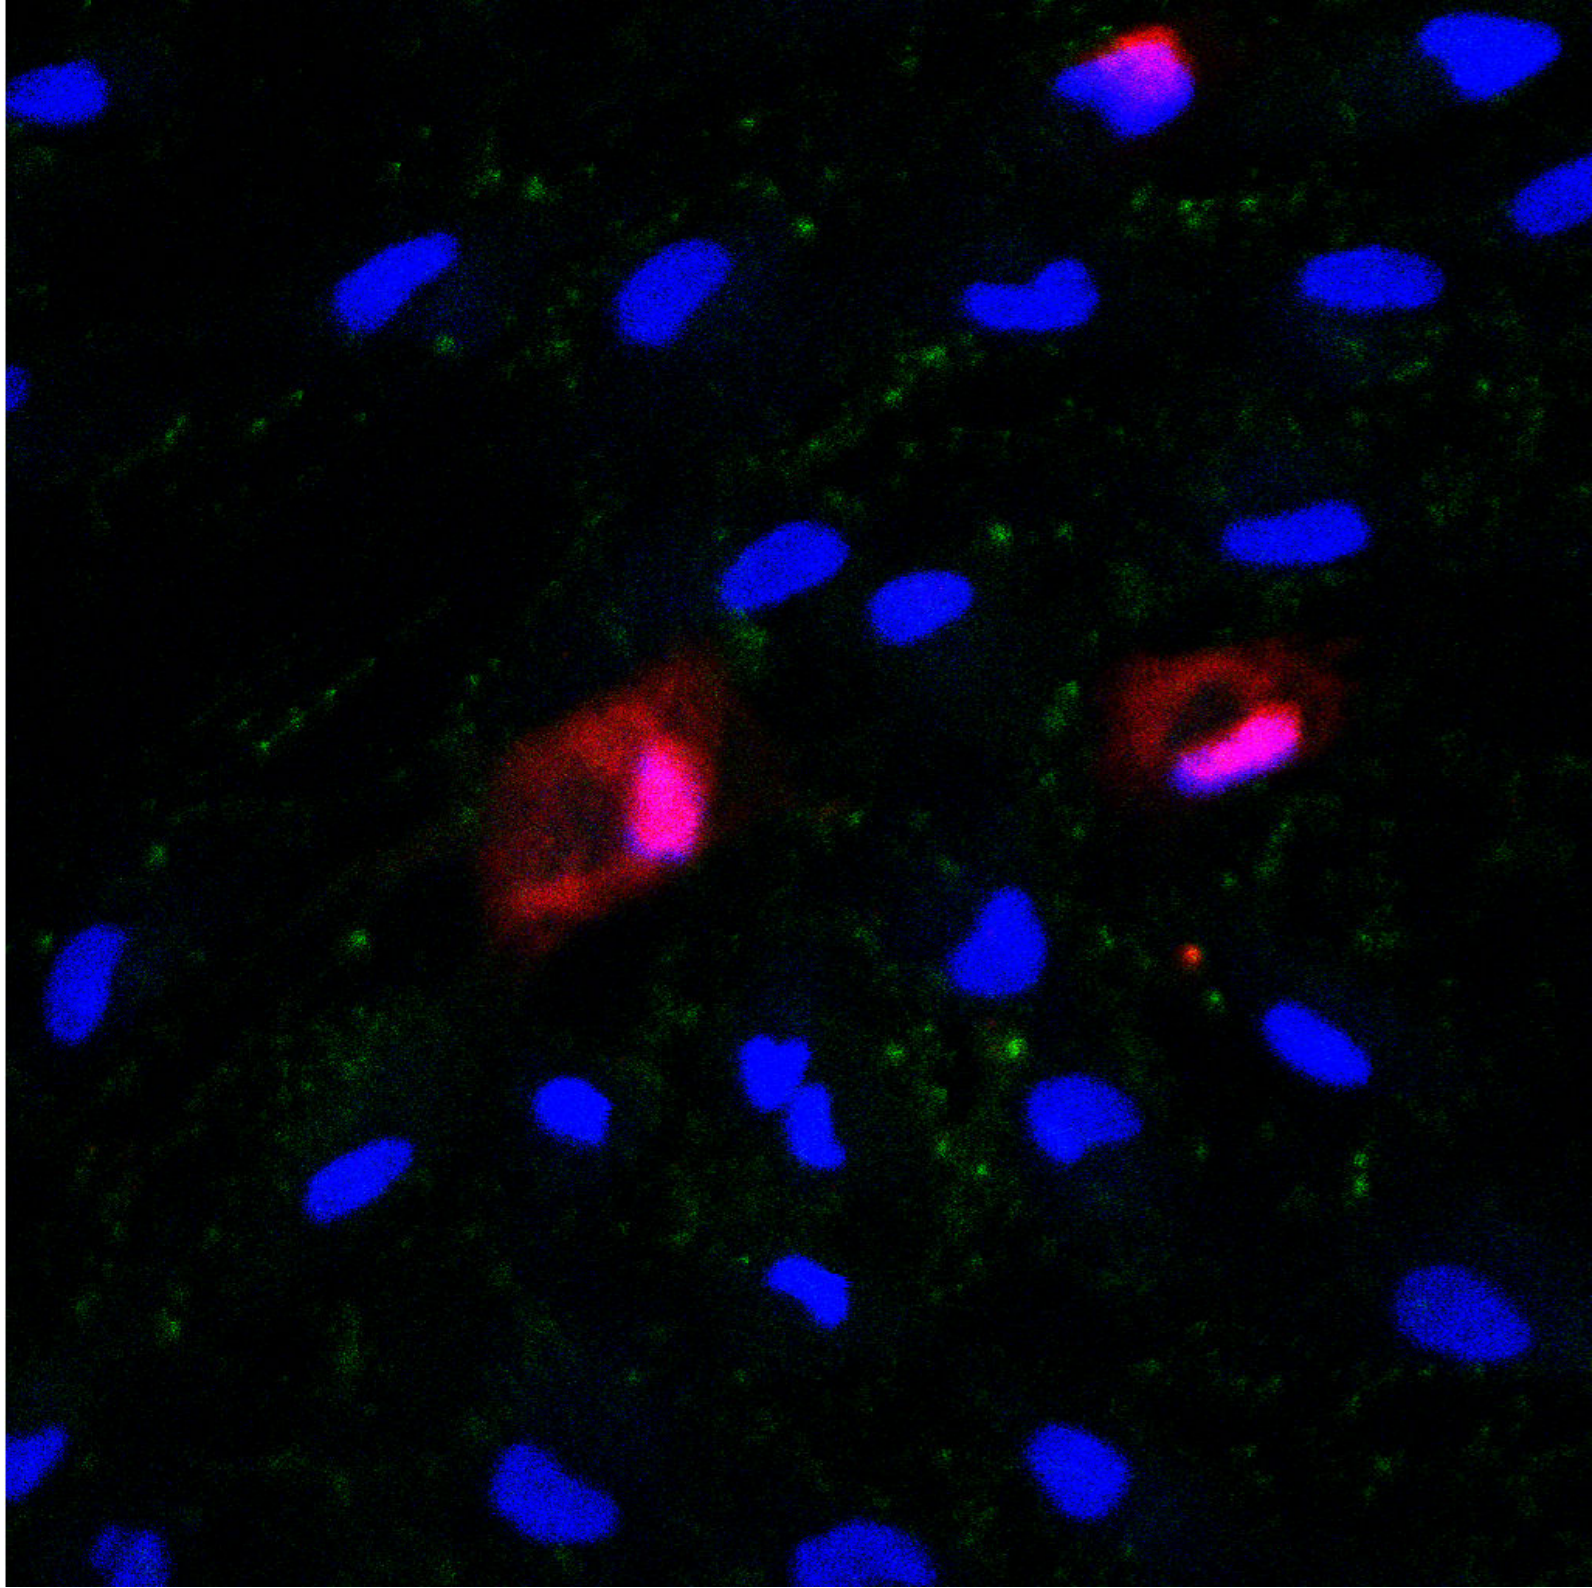



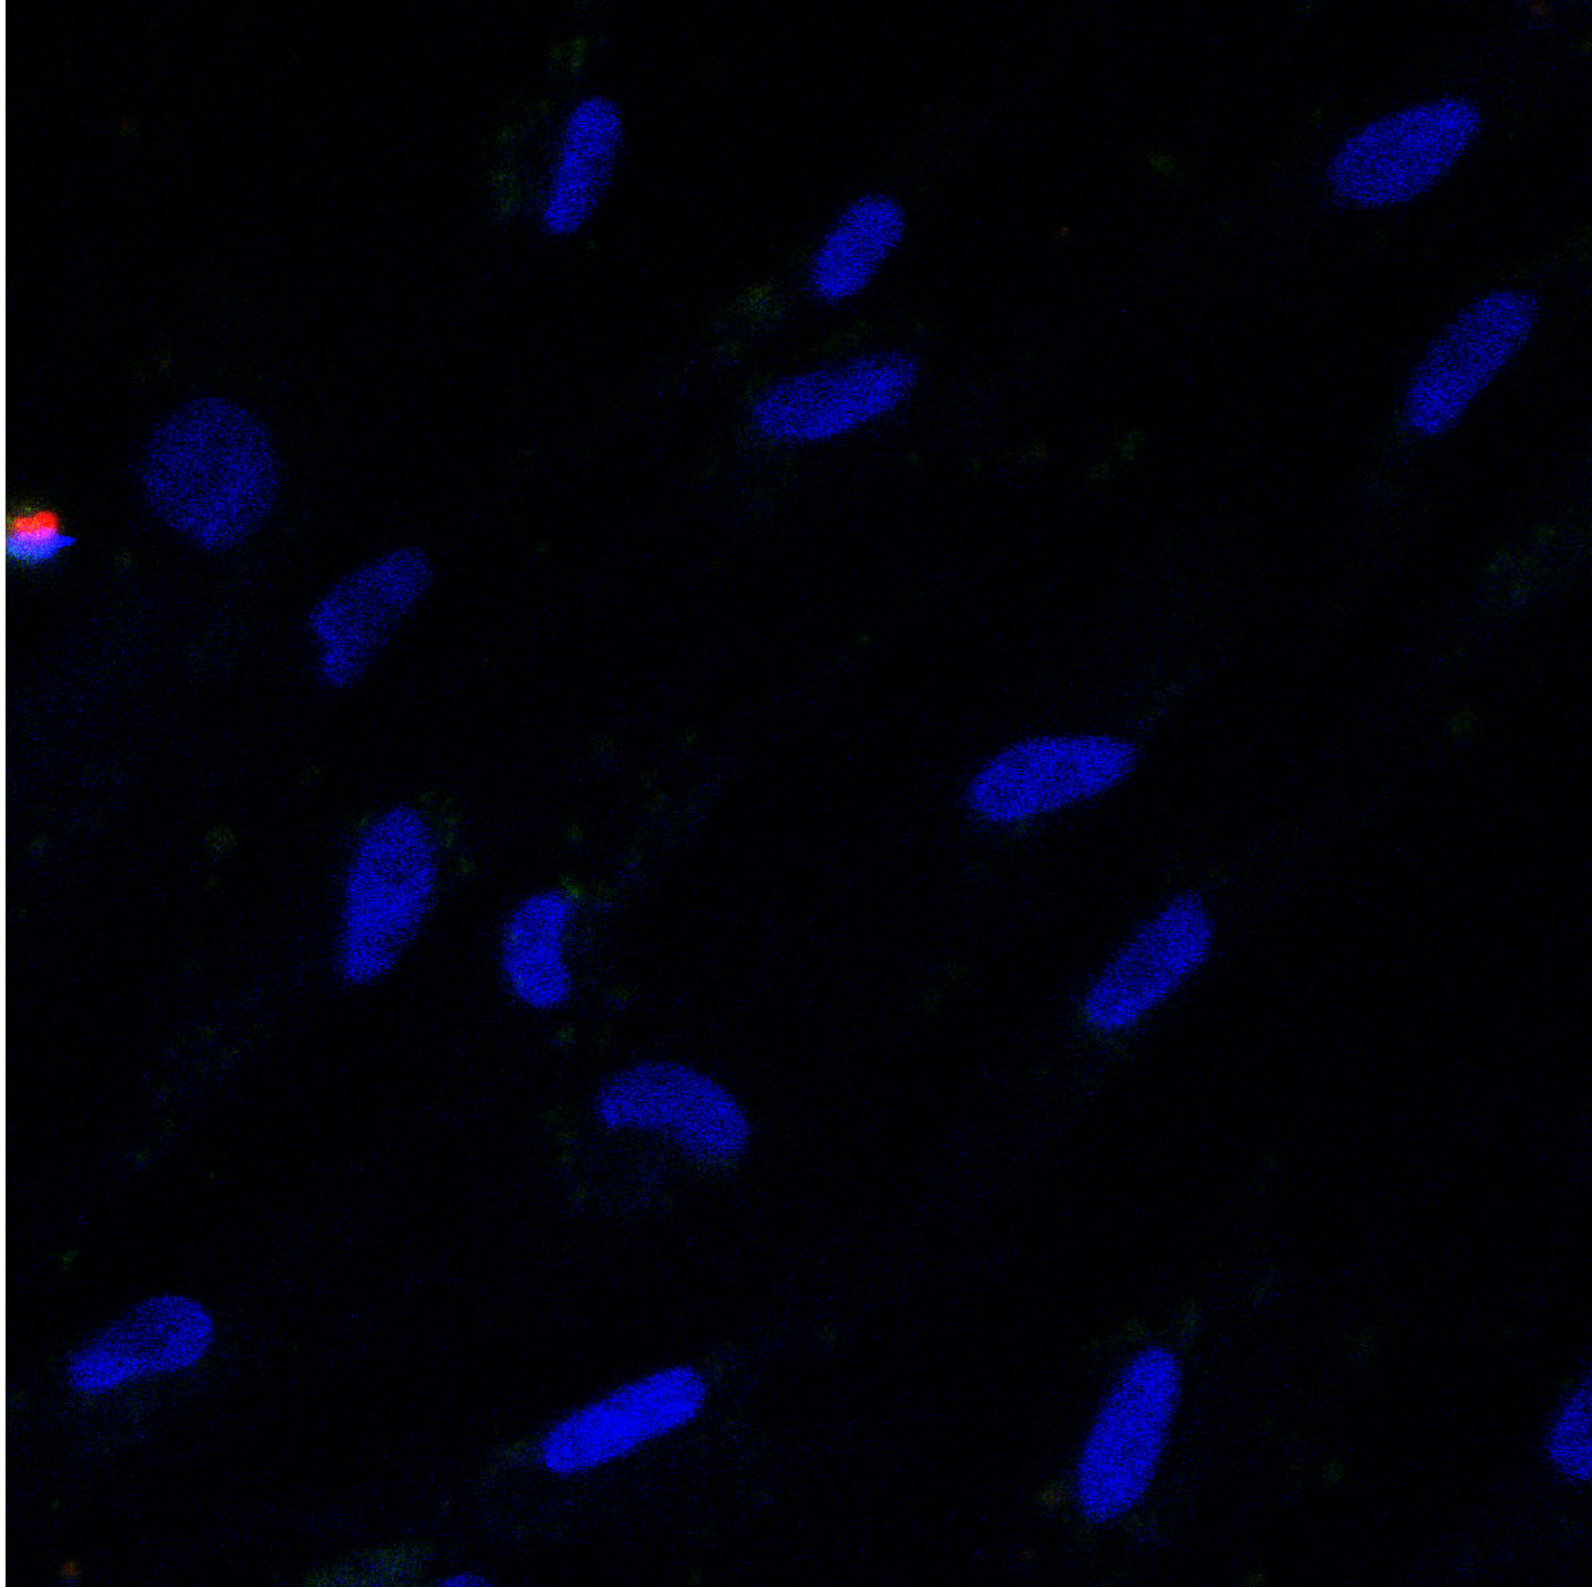

Supplement: MOESM3 [file 41419_2022_5186_MOESM3_ESM.pdf]
